# Supplementary material for: Using liquid chromatography mass spectrometry (LC-MS) to assess the effect of age, high-fat diet, and rat strain on the liver metabolome
Source: PLoS One. 2020 Jul 1;15(7):e0235338. doi: 10.1371/journal.pone.0235338 (PMC7329071; doi:10.1371/journal.pone.0235338)
Supplement: S1 Data — (XLSX) [file pone.0235338.s003.xlsx]

## Sheet: Strain
# Notes : Created from Advanced Analysis operation: significance Analysis.
#Entitylist : New ID
#Interpretation : Diet - Time Point - Strain (Non-averaged)
#Experiment: NIOSH JA
#corrected p-value cut-off:0.05
#Selected Test : 3way ANOVA
#p-value computation: Asymptotic
#Multiple Testing Correction: Bonferroni FWER
#
# Technology : MassHunterQual.IDENTIFIED_UNIDENTIFIED_COMPOUNDS.NIOSH JA_2017_Dec_21_07_22_35
# Owner : gxuser
# Created On : Fri Jun 29 14:52:44 EDT 2018
Compound	SS(Time Point)	SS(Time Point-Diet)	SS(Time Point-Diet-Strain)	SS(Time Point-Strain)	SS(Diet)	SS(Diet-Strain)	SS(Strain)	p (Time Point)	p (Time Point-Diet)	p (Time Point-Diet-Strain)	p (Time Point-Strain)	p (Diet)	p (Diet-Strain)	p (Strain)	p (Corr) (Time Point)	p (Corr) (Time Point-Diet)	p (Corr) (Time Point-Diet-Strain)	p (Corr) (Time Point-Strain)	p (Corr) (Diet)	p (Corr) (Diet-Strain)	p (Corr) (Strain)	FC ([High Fat-12 Weeks-Brown-Norway] vs [Regular Diet-4 Weeks-Sprague-Dawley])	Log FC ([High Fat-12 Weeks-Brown-Norway] vs [Regular Diet-4 Weeks-Sprague-Dawley])	FC (abs) ([High Fat-12 Weeks-Brown-Norway] vs [Regular Diet-4 Weeks-Sprague-Dawley])	Regulation ([High Fat-12 Weeks-Brown-Norway] vs [Regular Diet-4 Weeks-Sprague-Dawley])	FC ([High Fat-12 Weeks-Sprague-Dawley] vs [Regular Diet-4 Weeks-Sprague-Dawley])	Log FC ([High Fat-12 Weeks-Sprague-Dawley] vs [Regular Diet-4 Weeks-Sprague-Dawley])	FC (abs) ([High Fat-12 Weeks-Sprague-Dawley] vs [Regular Diet-4 Weeks-Sprague-Dawley])	Regulation ([High Fat-12 Weeks-Sprague-Dawley] vs [Regular Diet-4 Weeks-Sprague-Dawley])	FC ([High Fat-24 Weeks-Brown-Norway] vs [Regular Diet-4 Weeks-Sprague-Dawley])	Log FC ([High Fat-24 Weeks-Brown-Norway] vs [Regular Diet-4 Weeks-Sprague-Dawley])	FC (abs) ([High Fat-24 Weeks-Brown-Norway] vs [Regular Diet-4 Weeks-Sprague-Dawley])	Regulation ([High Fat-24 Weeks-Brown-Norway] vs [Regular Diet-4 Weeks-Sprague-Dawley])	FC ([High Fat-24 Weeks-Sprague-Dawley] vs [Regular Diet-4 Weeks-Sprague-Dawley])	Log FC ([High Fat-24 Weeks-Sprague-Dawley] vs [Regular Diet-4 Weeks-Sprague-Dawley])	FC (abs) ([High Fat-24 Weeks-Sprague-Dawley] vs [Regular Diet-4 Weeks-Sprague-Dawley])	Regulation ([High Fat-24 Weeks-Sprague-Dawley] vs [Regular Diet-4 Weeks-Sprague-Dawley])	FC ([High Fat-4 Weeks-Brown-Norway] vs [Regular Diet-4 Weeks-Sprague-Dawley])	Log FC ([High Fat-4 Weeks-Brown-Norway] vs [Regular Diet-4 Weeks-Sprague-Dawley])	FC (abs) ([High Fat-4 Weeks-Brown-Norway] vs [Regular Diet-4 Weeks-Sprague-Dawley])	Regulation ([High Fat-4 Weeks-Brown-Norway] vs [Regular Diet-4 Weeks-Sprague-Dawley])	FC ([High Fat-4 Weeks-Sprague-Dawley] vs [Regular Diet-4 Weeks-Sprague-Dawley])	Log FC ([High Fat-4 Weeks-Sprague-Dawley] vs [Regular Diet-4 Weeks-Sprague-Dawley])	FC (abs) ([High Fat-4 Weeks-Sprague-Dawley] vs [Regular Diet-4 Weeks-Sprague-Dawley])	Regulation ([High Fat-4 Weeks-Sprague-Dawley] vs [Regular Diet-4 Weeks-Sprague-Dawley])	FC ([Regular Diet-12 Weeks-Brown-Norway] vs [Regular Diet-4 Weeks-Sprague-Dawley])	Log FC ([Regular Diet-12 Weeks-Brown-Norway] vs [Regular Diet-4 Weeks-Sprague-Dawley])	FC (abs) ([Regular Diet-12 Weeks-Brown-Norway] vs [Regular Diet-4 Weeks-Sprague-Dawley])	Regulation ([Regular Diet-12 Weeks-Brown-Norway] vs [Regular Diet-4 Weeks-Sprague-Dawley])
(+)-artemisinic acid	363.108	72.9589	298.997	309.574	539.991	1005.77	872.573	0.016214	0.420456	0.0324797	0.028936	0.000571909	5.25559e-06	1.875e-05	1	1	1	1	0.735475	0.00675868	0.0241125	306102	18.2237	306102	up	1.7694	0.823261	1.7694	up	243190	17.8917	243190	up	51.5686	5.68842	51.5686	up	8409.11	13.0377	8409.11	up	3.67799	1.87892	3.67799	up	4.75143	2.24836	4.75143	up
(2-Naphthyl)methanol	5.48798	1.63838	52.0774	39.4831	22.0402	40.0909	4206.84	0.900754	0.969247	0.375312	0.474545	0.362202	0.22018	4.15108e-20	1	1	1	1	1	1	5.33828e-17	-1554.17	-10.6019	1554.17	down	-1.13857	-0.187226	1.13857	down	-5551.64	-12.4387	5551.64	down	6.72722	2.75001	6.72722	up	-2960.32	-11.5315	2960.32	down	3.51684	1.81428	3.51684	up	-35405.6	-15.1117	35405.6	down
(2-Naphthyl)methanol nullnullnull 9.478012	543.669	54.9497	564.991	133.061	0.260264	6.16721	1354.2	0.00501417	0.564677	0.00413489	0.254415	0.941318	0.720204	1.0564e-06	1	1	1	1	1	1	0.00135853	15613.6	13.9305	15613.6	up	1.7694	0.823261	1.7694	up	207.99	7.70037	207.99	up	1.6457	0.718699	1.6457	up	764.14	9.57769	764.14	up	113.784	6.83016	113.784	up	1645.75	10.6845	1645.75	up
(Gal?1-4GlcNAc?)2-Sp	522.464	16.4133	206.727	182.755	291.142	138.154	839.561	5.29238e-06	0.637577	0.00499255	0.00888625	0.000145963	0.00728105	2.37434e-09	0.006806	1	1	1	0.187708	1	3.0534e-06	30.1944	4.91621	30.1944	up	14533.1	13.8271	14533.1	up	1.28242	0.358864	1.28242	up	2265.34	11.1455	2265.34	up	1.08287	0.114864	1.08287	up	183.745	7.52156	183.745	up	1.32542	0.406449	1.32542	up
10-Methyl-9-hexadecenoic acid	87.8318	265.971	136.789	301.754	33.6866	0.245084	1310.94	0.275175	0.0229334	0.13666	0.0142	0.31882	0.932007	2.35733e-08	1	1	1	1	1	1	3.03153e-05	-4.3907	-2.13445	4.3907	down	1.03677	0.0520897	1.03677	up	-103.379	-6.6918	103.379	down	3.51468	1.81339	3.51468	up	-122.429	-6.9358	122.429	down	111.18	6.79675	111.18	up	-100.025	-6.64421	100.025	down
14:1 Cholesteryl ester	48.2489	69.1561	73.5232	87.4208	127.301	35.6864	3373.18	0.19778	0.100149	0.0870175	0.0558342	0.00418175	0.121752	2.3776e-24	1	1	1	1	1	1	3.0576e-21	-2083.65	-11.0249	2083.65	down	1.19345	0.255144	1.19345	up	-49059.3	-15.5822	49059.3	down	-1.06809	-0.095036	1.06809	down	-58099.5	-15.8262	58099.5	down	1.02253	0.0321486	1.02253	up	-47467.6	-15.5347	47467.6	down
2-Hexyldecanoic acid null 1.6970016	53.4186	17.6554	80.1966	5.39	53.9047	4.13317	3462.16	0.162844	0.543403	0.0677514	0.829211	0.0565002	0.593163	7.71324e-25	1	1	1	1	1	1	9.91923e-22	-71.0084	-6.14992	71.0084	down	14.0733	3.81489	14.0733	up	-1671.89	-10.7073	1671.89	down	16.9315	4.08164	16.9315	up	-1979.97	-10.9513	1979.97	down	27.9464	4.80459	27.9464	up	-1617.64	-10.6597	1617.64	down
2-Hexyldecanoic acid null 1.6970016 :48	13.5823	26.1475	31.7064	32.2672	6.4395	7.68034	4073.26	0.26557	0.081187	0.048642	0.0462102	0.261541	0.220519	2.9727e-41	1	1	1	1	1	1	3.82291e-38	-1325.83	-10.3727	1325.83	down	-1.32616	-0.40725	1.32616	down	-31216.6	-14.93	31216.6	down	-1.0015	-0.0021652	1.0015	down	-36968.9	-15.174	36968.9	down	1.47475	0.56047	1.47475	up	-30203.7	-14.8824	30203.7	down
2-Hexyldecanoic acid null 5.066001	113.475	542.51	1093.42	4.00916	212.324	85.7918	1993.92	0.205794	0.000906074	2.33861e-06	0.94456	0.0163092	0.12238	1.04882e-10	1	1	0.00300745	1	1	1	1.34878e-07	18.7871	4.23167	18.7871	up	60.73	5.92434	60.73	up	-1.25325	-0.325671	1.25325	down	57389.3	15.8085	57389.3	up	-1.48418	-0.569671	1.48418	down	183200	17.4831	183200	up	-1.21258	-0.278086	1.21258	down
2-Hexyldecanoic acid nullnullnull 4.969998	156.173	721.226	336.986	19.3728	100.764	229.469	1580.1	0.141985	0.000260557	0.0167579	0.780444	0.112026	0.0176725	1.49928e-08	1	0.335076	1	1	1	1	1.92807e-05	112.625	6.81538	112.625	up	1.16495	0.220272	1.16495	up	3.54899	1.82741	3.54899	up	-801.158	-9.64594	801.158	down	4.5372	2.1818	4.5372	up	-79762.2	-16.2834	79762.2	down	5.44601	2.4452	5.44601	up
2-Hexyldecanoic acid nullnullnull 7.0640078	23.874	937.287	251.368	5.51098	5.56334	52.6765	2889.5	0.751336	5.43269e-05	0.0548331	0.935948	0.715612	0.264091	3.29879e-12	1	0.0698644	1	1	1	1	4.24224e-09	2300.25	11.1676	2300.25	up	6.21788	2.63642	6.21788	up	96.2771	6.58912	96.2771	up	-543.136	-9.08517	543.136	down	73.9005	6.20751	73.9005	up	-1167.29	-10.1889	1167.29	down	18.5354	4.21221	18.5354	up
2-Methyl-tetradecanoic acid nullnullnull 5.2030025	356.5	365.196	219.501	279.58	34.5437	170.983	1564.44	0.015463	0.0140478	0.0725912	0.0365477	0.357926	0.0431294	2.73284e-08	1	1	1	1	1	1	3.51443e-05	410.311	8.68057	410.311	up	-21.8004	-4.44628	21.8004	down	21.9035	4.45309	21.9035	up	-10.9811	-3.45695	10.9811	down	2.14671	1.10213	2.14671	up	-7560.72	-12.8843	7560.72	down	31.4646	4.97566	31.4646	up
2-Methyl-tetradecanoic acid nullnullnull 5.4580064	30.5931	100.067	166.14	372.187	25.5981	455.659	1015	0.670158	0.274399	0.11972	0.0101088	0.414515	0.000898898	1.9884e-06	1	1	1	1	1	1	0.00255708	76.2771	6.25318	76.2771	up	-184.832	-7.53007	184.832	down	5.61705	2.48981	5.61705	up	-215.074	-7.74869	215.074	down	9.35383	3.22556	9.35383	up	-285.909	-8.15941	285.909	down	8.25962	3.04607	8.25962	up
3,4,3',4'-Tetrahydrospirilloxanthin	278.703	0.297595	110.358	339.536	3.59916	11.6405	901.758	0.0105764	0.994841	0.154175	0.0042072	0.724555	0.526662	3.57663e-07	1	1	1	1	1	1	0.000459954	-128.023	-7.00025	128.023	down	-45.3375	-5.50263	45.3375	down	-3014.28	-11.5576	3014.28	down	-207.447	-7.6966	207.447	down	-3569.73	-11.8016	3569.73	down	1.46718	0.553042	1.46718	up	-2916.48	-11.51	2916.48	down
34:5(19Z,22Z,25Z,28Z,31Z)	512.494	40.8434	82.2621	454.379	23.7494	58.8608	1950.51	0.00013922	0.452717	0.206193	0.000344112	0.337608	0.132935	5.54265e-13	0.179037	1	1	0.442528	1	1	7.12785e-10	4797.52	12.2281	4797.52	up	1.7694	0.823261	1.7694	up	25.3137	4.66184	25.3137	up	1.6457	0.718699	1.6457	up	1802.51	10.8158	1802.51	up	3.67799	1.87892	3.67799	up	53175.3	15.6985	53175.3	up
6E,8E,12E,14E-Hexadecatetraen-10-ynoic acid nullnullnull 9.559006	146.002	145.184	130.401	151.678	11.9567	0.434424	4091.49	0.201254	0.203029	0.238068	0.189359	0.605949	0.921601	1.5073e-14	1	1	1	1	1	1	1.93839e-11	2.24092e+06	21.0957	2.24092e+06	up	1.7694	0.823261	1.7694	up	5413.3	12.4023	5413.3	up	1.6457	0.718699	1.6457	up	7795.98	12.9285	7795.98	up	3.67799	1.87892	3.67799	up	39214.9	15.2591	39214.9	up
6E,8E,12E,14E-Hexadecatetraen-10-ynoic acid nullnullnull 9.586002	157.001	331.797	41.2333	480.509	10.5288	82.0379	6167.09	0.0927391	0.0077888	0.52746	0.0010725	0.567683	0.113374	3.44564e-22	1	1	1	1	1	1	4.4311e-19	55978924	25.7384	55978924	up	1.7694	0.823261	1.7694	up	213446	17.7035	213446	up	8.5937	3.10328	8.5937	up	1.64697e+06	20.6514	1.64697e+06	up	3.67799	1.87892	3.67799	up	2.71465e+06	21.3723	2.71465e+06	up
all-trans-4-Hydroxyretinoic acid	33.6589	117.225	190.514	22.4391	0.674295	13.1037	2387.99	0.63992	0.216171	0.085637	0.742144	0.893654	0.5561	1.51417e-11	1	1	1	1	1	1	1.94722e-08	5680.68	12.4718	5680.68	up	1.7694	0.823261	1.7694	up	9105.73	13.1526	9105.73	up	1.6457	0.718699	1.6457	up	240.073	7.90733	240.073	up	3.67799	1.87892	3.67799	up	14719.8	13.8455	14719.8	up
C10 H13 N2 nullnullnull 4.5700054	19.769	800.164	413.435	151.4	73.4546	35.5261	2903.46	0.866033	0.00446513	0.0552465	0.337111	0.304143	0.474007	8.45311e-09	1	1	1	1	1	1	1.08707e-05	12609.8	13.6223	12609.8	up	8.57233	3.09969	8.57233	up	56.5043	5.82029	56.5043	up	-79.4669	-6.31228	79.4669	down	4146.17	12.0176	4146.17	up	-35.557	-5.15206	35.557	down	12.9619	3.6962	12.9619	up
C10 H13 O4	287.51	238.069	190.12	183.148	103.556	115.696	442.828	3.31513e-06	2.17714e-05	0.000148935	0.000198692	0.00152027	0.000842036	2.30168e-09	0.00426326	0.027998	0.19153	0.255518	1	1	2.95996e-06	18.4229	4.20343	18.4229	up	-1.05744	-0.0805788	1.05744	down	3.95695	1.98439	3.95695	up	1.40384	0.489378	1.40384	up	3.30098	1.72289	3.30098	up	-12943.8	-13.66	12943.8	down	5.49979	2.45938	5.49979	up
C10 H14 N6 O7	91.1449	217.035	588.14	5.51705	115.156	29.3991	1639.56	0.22133	0.0303894	0.000152658	0.911121	0.0523452	0.322238	1.5612e-10	1	1	0.196319	1	1	1	2.0077e-07	5.59595	2.48438	5.59595	up	27.2751	4.76951	27.2751	up	-4.2075	-2.07296	4.2075	down	2825.15	11.4641	2825.15	up	-4.98282	-2.31696	4.98282	down	5461.96	12.4152	5461.96	up	-4.07098	-2.02538	4.07098	down
C10 H25 N2 O	42.578	44.169	65.3965	32.8543	118.884	0.470963	2680.13	0.411629	0.398365	0.258051	0.503177	0.0281362	0.888269	1.72743e-16	1	1	1	1	1	1	2.22148e-13	-259.607	-8.02018	259.607	down	6.51207	2.70312	6.51207	up	-264.932	-8.04948	264.932	down	9.55799	3.25671	9.55799	up	-700.557	-9.45236	700.557	down	10.7517	3.4265	10.7517	up	-5914.11	-12.5299	5914.11	down
C10 H3 N2	38.6009	139.61	203.072	294.262	26.2045	331.654	2210.84	0.716798	0.304181	0.179324	0.0850326	0.502506	0.0190695	3.1773e-08	1	1	1	1	1	1	4.08601e-05	58690.2	15.8408	58690.2	up	2.50357	1.32399	2.50357	up	270.782	8.08099	270.782	up	1.81073	0.856575	1.81073	up	12.9186	3.69138	12.9186	up	76.718	6.26149	76.718	up	11255	13.4583	11255	up
C10 H31 N8 O2	62.5716	58.5528	302.15	15.9397	191.333	72.6473	4246.19	0.400571	0.424523	0.0146992	0.79038	0.0199123	0.146752	1.54528e-17	1	1	1	1	1	1	1.98723e-14	-55.1822	-5.78613	55.1822	down	24.0424	4.58751	24.0424	up	-1299.26	-10.3435	1299.26	down	182.595	7.5125	182.595	up	-1538.68	-10.5875	1538.68	down	1192.03	10.2192	1192.03	up	-1257.11	-10.2959	1257.11	down
C10 H4 N O10 S2	49.8504	158.151	344.401	7.39896	66.4763	8.09028	2213.82	0.486563	0.106661	0.00901291	0.897785	0.167855	0.628458	1.19156e-11	1	1	1	1	1	1	1.53234e-08	-1.13105	-0.177665	1.13105	down	29.5282	4.88402	29.5282	up	-26.6305	-4.73501	26.6305	down	119.607	6.90216	119.607	up	-31.5378	-4.97901	31.5378	down	2949.79	11.5264	2949.79	up	-25.7665	-4.68742	25.7665	down
C10 N O8 S	26.6724	6.50155	75.4195	20.3695	29.661	19.8475	3168.66	0.388696	0.792468	0.0734465	0.48488	0.148814	0.236498	3.98035e-24	1	1	1	1	1	1	5.11874e-21	-1031.96	-10.0112	1031.96	down	-4.37254	-2.12847	4.37254	down	-24297.4	-14.5685	24297.4	down	-1.32934	-0.410712	1.32934	down	-3459.76	-11.7565	3459.76	down	1.62277	0.698462	1.62277	up	-23509	-14.5209	23509	down
C11 H13 N2 O14	79.0846	448.08	164.903	5.72867	125.455	254.951	2261.7	0.257226	0.000824848	0.0622726	0.904774	0.0396415	0.00383935	2.92763e-13	1	1	1	1	1	1	3.76494e-10	208.637	7.70485	208.637	up	-8.21238	-3.0378	8.21238	down	11.9477	3.57866	11.9477	up	-2257.43	-11.1405	2257.43	down	6.61431	2.72559	6.61431	up	-17398.3	-14.0867	17398.3	down	12.6848	3.66502	12.6848	up
C11 H17 N O2 S	60.5526	190.685	35.1885	4.31668	110.64	201.23	1278.46	0.483913	0.106612	0.65471	0.949115	0.10598	0.0304294	4.12324e-07	1	1	1	1	1	1	0.000530249	103.604	6.69493	103.604	up	-13.1494	-3.71693	13.1494	down	6.59018	2.72032	6.59018	up	-208.958	-7.70707	208.958	down	3.45937	1.79051	3.45937	up	-1557.3	-10.6048	1557.3	down	7.69852	2.94458	7.69852	up
C11 H17 N O2 S nullnullnull 4.877007	187.14	387.085	132.606	14.2814	193.666	308.889	1535.68	0.0278003	0.000860608	0.0761933	0.751147	0.00669535	0.000735043	2.57802e-11	1	1	1	1	1	0.945266	3.31534e-08	104.53	6.70777	104.53	up	-3.21909	-1.68665	3.21909	down	6.6526	2.73392	6.6526	up	-888.51	-9.79524	888.51	down	3.48139	1.79966	3.48139	up	-33949.1	-15.0511	33949.1	down	7.82477	2.96805	7.82477	up
C11 H29 N5 O2	122.231	49.782	96.1023	94.8773	37.8356	80.0991	768.897	0.0750561	0.340641	0.12858	0.131892	0.201488	0.0647353	1.51723e-07	1	1	1	1	1	1	0.000195116	108.242	6.75812	108.242	up	1.7694	0.823261	1.7694	up	22.0699	4.46401	22.0699	up	1.6457	0.718699	1.6457	up	25.9169	4.69582	25.9169	up	3.67799	1.87892	3.67799	up	1727.25	10.7543	1727.25	up
C11 O16 S	12.3157	11.2359	29.5627	19.0515	29.6356	31.2154	5490.09	0.794363	0.810513	0.57684	0.700812	0.295244	0.282819	6.09678e-23	1	1	1	1	1	1	7.84046e-20	1.8699e+06	20.8345	1.8699e+06	up	1.7694	0.823261	1.7694	up	333911	18.3491	333911	up	1.6457	0.718699	1.6457	up	157368	17.2638	157368	up	3.67799	1.87892	3.67799	up	103549	16.66	103549	up
C11 O16 S nullnullnull 1.5460008	162.325	226.575	292.151	352.92	20.8513	172.195	5124.92	0.0060745	0.000966537	0.00016214	3.34009e-05	0.239357	0.0010647	2.06079e-29	1	1	0.208513	0.0429536	1	1	2.65018e-26	9788007	23.2226	9788007	up	1.7694	0.823261	1.7694	up	533207	19.0243	533207	up	1.6457	0.718699	1.6457	up	191490	17.5469	191490	up	3.67799	1.87892	3.67799	up	774246	19.5624	774246	up
C12 H11 N	120.507	232.136	207.001	174.086	78.9237	5.27511	1900.71	0.163978	0.0331563	0.0472335	0.075471	0.123518	0.688247	6.48336e-11	1	1	1	1	1	1	8.3376e-08	255.143	7.99516	255.143	up	-5.51147	-2.46244	5.51147	down	18.0647	4.1751	18.0647	up	-15.7511	-3.97738	15.7511	down	7.85212	2.97308	7.85212	up	-59.7631	-5.90118	59.7631	down	15.4625	3.9507	15.4625	up
C12 H11 N null 5.467	91.8871	58.5797	154.759	164.449	25.2259	26.8896	2109.01	0.265378	0.426867	0.109998	0.0962159	0.39191	0.376807	2.41707e-11	1	1	1	1	1	1	3.10835e-08	-2.92495	-1.54841	2.92495	down	183.56	7.52011	183.56	up	-11.7591	-3.55571	11.7591	down	1072.91	10.0673	1072.91	up	-7.73763	-2.95189	7.73763	down	330.525	8.36862	330.525	up	-11.9137	-3.57455	11.9137	down
C12 H27 N2 O2	1.91724	64.4763	74.9195	85.9378	26.4552	0.0273905	2343.36	0.964754	0.304903	0.252447	0.207071	0.322852	0.974538	3.81605e-14	1	1	1	1	1	1	4.90744e-11	-58.1155	-5.86085	58.1155	down	-1.07207	-0.100396	1.07207	down	-1368.33	-10.4182	1368.33	down	1.21766	0.284112	1.21766	up	-1620.47	-10.6622	1620.47	down	31.5458	4.97937	31.5458	up	-1323.93	-10.3706	1323.93	down
C12 H29 N8 O4	156.389	180.119	81.2978	9.93954	19.2418	67.313	2639.03	0.179083	0.138908	0.40487	0.894262	0.512418	0.222178	4.94401e-11	1	1	1	1	1	1	6.358e-08	3067.62	11.5829	3067.62	up	-1.11302	-0.154482	1.11302	down	188.776	7.56053	188.776	up	-17.359	-4.11761	17.359	down	115.38	6.85025	115.38	up	-666.517	-9.3805	666.517	down	229.269	7.8409	229.269	up
C12 H31 N8 O2	141.414	16.2034	28.2238	170.092	252.457	268.274	2711.66	0.111254	0.77227	0.638296	0.0723957	0.00579639	0.00451551	4.75564e-14	1	1	1	1	1	1	6.11575e-11	-2346.21	-11.1961	2346.21	down	-1.04357	-0.0615289	1.04357	down	-816.944	-9.67409	816.944	down	1.29676	0.374908	1.29676	up	-7.69016	-2.94301	7.69016	down	-1.29484	-0.372774	1.29484	down	-278692	-18.0883	278692	down
C12 H35 N8 O2	40.5691	76.1699	59.8365	18.9248	54.8015	54.5562	1309.39	0.508285	0.283543	0.370181	0.728157	0.178515	0.179478	4.80924e-09	1	1	1	1	1	1	6.18468e-06	-412.99	-8.68996	412.99	down	-1.50409	-0.588892	1.50409	down	-288.344	-8.17165	288.344	down	-1.01732	-0.0247705	1.01732	down	-5.67546	-2.50474	5.67546	down	1.33097	0.412483	1.33097	up	-1457.46	-10.5092	1457.46	down
C12 H6 N nullnullnull 7.5029945	71.422	106.364	86.6484	132.842	73.1256	66.108	1460.27	0.410465	0.267583	0.340437	0.194129	0.178452	0.200509	5.19702e-08	1	1	1	1	1	1	6.68337e-05	-60.2512	-5.91292	60.2512	down	1.3108	0.390448	1.3108	up	-100.244	-6.64737	100.244	down	1.88391	0.913733	1.88391	up	-81.9959	-6.35748	81.9959	down	-1.15076	-0.202592	1.15076	down	-4013.78	-11.9707	4013.78	down
C12 H7 N2 nullnullnull 13.515012	663.602	53.2904	113.291	3205.99	30.3579	111.395	2729.5	9.63784e-06	0.341282	0.105533	4.88016e-17	0.26854	0.0360573	2.25919e-16	0.0123943	1	1	6.27588e-14	1	1	2.90532e-13	52189584	25.6373	52189584	up	1.7694	0.823261	1.7694	up	336804	18.3616	336804	up	1243027	20.2454	1243027	up	1751306	20.74	1751306	up	3.67799	1.87892	3.67799	up	4286255	22.0313	4286255	up
C12 O9 S2	6.12024	108.1	397.935	122.602	53.1005	3.01678	2188.7	0.928834	0.27735	0.0109551	0.234302	0.26117	0.787988	3.27671e-10	1	1	1	1	1	1	4.21384e-07	453.74	8.82572	453.74	up	1.7694	0.823261	1.7694	up	10413.5	13.3462	10413.5	up	1.6457	0.718699	1.6457	up	2396	11.2264	2396	up	3.67799	1.87892	3.67799	up	371688	18.5037	371688	up
C13 H11 N2 O14	344.398	350.521	148.221	432.14	0.621137	14.2095	2445.64	0.00167778	0.00151196	0.0556697	0.000388184	0.87433	0.450215	3.03166e-15	1	1	1	0.499205	1	1	3.89871e-12	3202.58	11.645	3202.58	up	-7.52478	-2.91165	7.52478	down	208.698	7.70527	208.698	up	8.39543	3.0696	8.39543	up	116.058	6.8587	116.058	up	-660.559	-9.36754	660.559	down	205.735	7.68465	205.735	up
C13 H24 N S	307.782	176.218	78.5442	85.7054	258.08	60.5496	1668.03	0.0341685	0.13929	0.409926	0.378321	0.0173053	0.241919	3.14673e-08	1	1	1	1	1	1	4.04669e-05	-1077.25	-10.0731	1077.25	down	-1.15744	-0.210939	1.15744	down	-25363.8	-14.6305	25363.8	down	-1.04459	-0.0629356	1.04459	down	-275.776	-8.10735	275.776	down	-1.1327	-0.179767	1.1327	down	-24540.9	-14.5829	24540.9	down
C13 H25 N O3 S	116.585	212.147	48.6912	157.066	549.952	65.7759	894.46	0.265419	0.0926556	0.57129	0.169318	0.000636058	0.220935	2.07047e-05	1	1	1	1	0.817971	1	0.0266262	6728.82	12.7161	6728.82	up	25.072	4.648	25.072	up	8353.99	13.0282	8353.99	up	17236.8	14.0732	17236.8	up	2561.55	11.3228	2561.55	up	14.3247	3.84043	14.3247	up	2531.86	11.306	2531.86	up
C13 H27 N14	86.0094	6.17317	141.012	131.043	105.684	49.0954	2423.9	0.27271	0.909541	0.121644	0.140626	0.0755225	0.223072	9.03624e-13	1	1	1	1	1	1	1.16206e-09	-19.861	-4.31187	19.861	down	115.791	6.85538	115.791	up	-467.626	-8.86921	467.626	down	128.562	7.00632	128.562	up	-54.5455	-5.76939	54.5455	down	24.4902	4.61413	24.4902	up	-452.454	-8.82163	452.454	down
C13 H27 N6 O3	200.158	38.1446	166.925	115.543	71.5365	35.6168	4173.78	0.00623349	0.359247	0.0138129	0.0489608	0.052238	0.168018	4.10041e-24	1	1	1	1	1	1	5.27313e-21	202678	17.6288	202678	up	1.7694	0.823261	1.7694	up	154458	17.2369	154458	up	1.6457	0.718699	1.6457	up	190.879	7.57652	190.879	up	3.67799	1.87892	3.67799	up	182847	17.4803	182847	up
C13 H33 N4 S	245.844	1.15818	125.867	543.785	8.24063	66.906	1459.81	0.00292018	0.970638	0.0448565	7.14646e-06	0.516861	0.0674937	7.77248e-13	1	1	1	0.00919034	1	1	9.99541e-10	-115.406	-6.85058	115.406	down	-1948.12	-10.9279	1948.12	down	-2717.24	-11.4079	2717.24	down	6.08958	2.60634	6.08958	up	-3217.95	-11.6519	3217.95	down	-3.04434	-1.60613	3.04434	down	-2629.07	-11.3603	2629.07	down
C13 H6 O17 S2	49.5363	363.887	832.238	9.58288	137.32	41.0802	1624.55	0.449103	0.00405406	9.55896e-06	0.855358	0.0375543	0.250392	3.06219e-10	1	1	0.0122928	1	1	1	3.93797e-07	4.16246	2.05744	4.16246	up	6.05182	2.59737	6.05182	up	-5.65649	-2.49991	5.65649	down	1968.05	10.9426	1968.05	up	-6.69882	-2.74391	6.69882	down	21048.6	14.3614	21048.6	up	-5.47296	-2.45232	5.47296	down
C13 N O10 S	62.0125	18.9964	70.8633	3.10973	65.848	7.87206	4046.44	0.152913	0.556777	0.117867	0.908004	0.0467382	0.486486	2.37213e-25	1	1	1	1	1	1	3.05055e-22	-169.929	-7.40879	169.929	down	19.448	4.28155	19.448	up	-4000.98	-11.9661	4000.98	down	10.6332	3.4105	10.6332	up	-4738.24	-12.2101	4738.24	down	30.315	4.92196	30.315	up	-3871.17	-11.9186	3871.17	down
C13 N O10 S null 1.5399988	14.2805	93.229	284.031	33.0804	14.8755	2.10855	3059.18	0.780019	0.20348	0.00957079	0.563867	0.473425	0.78691	6.15426e-16	1	1	1	1	1	1	7.91437e-13	-25.8683	-4.69311	25.8683	down	1.30392	0.382854	1.30392	up	-609.068	-9.25046	609.068	down	18.384	4.20038	18.384	up	-721.301	-9.49446	721.301	down	225.936	7.81977	225.936	up	-589.306	-9.20287	589.306	down
C13 N O10 S null 2.5989993	239.377	205.381	168.792	153.966	47.0305	2.39915	1354.8	0.0449448	0.0687363	0.109194	0.13194	0.263023	0.799621	5.57928e-08	1	1	1	1	1	1	7.17495e-05	-3.26089	-1.70527	3.26089	down	59.4696	5.89408	59.4696	up	-76.7775	-6.26261	76.7775	down	-12.1575	-3.60378	12.1575	down	-90.9254	-6.50661	90.9254	down	433.681	8.76049	433.681	up	-74.2864	-6.21503	74.2864	down
C14 H32 O2	16.5578	22.0957	43.9189	9.48255	72.0624	3.32192	4247.19	0.754824	0.687385	0.476466	0.850997	0.121273	0.737388	5.28291e-19	1	1	1	1	1	1	6.79382e-16	-965.909	-9.91574	965.909	down	5.85719	2.55021	5.85719	up	-4263.18	-12.0577	4263.18	down	7.2685	2.86166	7.2685	up	-2681.47	-11.3888	2681.47	down	56.0284	5.80809	56.0284	up	-3989.22	-11.9619	3989.22	down
C14 H32 O2 null 1.6710011	180.305	131.871	334.035	40.2731	209.218	83.8216	2569.07	0.016458	0.047438	0.000691227	0.383566	0.00218726	0.0480849	2.1851e-17	1	1	0.888918	1	1	1	2.81004e-14	4.7187	2.23839	4.7187	up	1569.47	10.6161	1569.47	up	-4.98971	-2.31896	4.98971	down	7582.09	12.8884	7582.09	up	-5.90917	-2.56296	5.90917	down	13079.1	13.675	13079.1	up	-4.82781	-2.27137	4.82781	down
C14 H32 O2 null 4.4079957	87.6237	0.255497	33.483	66.0232	110.253	7.77026	2956.96	0.189087	0.995044	0.524427	0.283095	0.0419082	0.584161	1.18873e-16	1	1	1	1	1	1	1.52871e-13	-567.796	-9.14923	567.796	down	3.40391	1.76719	3.40391	up	-2712.8	-11.4056	2712.8	down	-1.92425	-0.944298	1.92425	down	-1967.26	-10.942	1967.26	down	4.03481	2.0125	4.03481	up	-12935	-13.659	12935	down
C14 H32 O2 null 5.2919936	30.5798	37.2339	46.8615	39.4782	3.06479	1.01222	3787.75	0.618364	0.557419	0.479963	0.538285	0.756364	0.858453	4.65728e-17	1	1	1	1	1	1	5.98927e-14	-21365.4	-14.383	21365.4	down	-1.11094	-0.151778	1.11094	down	-2133.5	-11.059	2133.5	down	-1.03584	-0.0508075	1.03584	down	-45986.5	-15.4889	45986.5	down	1.86307	0.897683	1.86307	up	-80476.4	-16.2963	80476.4	down
C14 H32 O2 null 5.757997	297.685	365.793	223.563	83.3224	0.168223	3.5043	1408.5	0.1103	0.0678298	0.188633	0.532276	0.95972	0.817724	1.51229e-05	1	1	1	1	1	1	0.0194481	40550.8	15.3074	40550.8	up	5.51393	2.46308	5.51393	up	5188	12.341	5188	up	1.2892	0.366472	1.2892	up	7.32741	2.8733	7.32741	up	2.77233	1.4711	2.77233	up	133.534	7.06106	133.534	up
C14 H32 O2 null 7.2420034	0.313293	29.9573	103.531	146.174	242.407	0.000863272	4186.88	0.995069	0.625183	0.202244	0.106804	0.00718349	0.99585	4.81218e-18	1	1	1	1	1	1	6.18846e-15	-143.369	-7.16359	143.369	down	238.08	7.8953	238.08	up	-119.038	-6.89528	119.038	down	163.028	7.34898	163.028	up	-43.3316	-5.43735	43.3316	down	323.886	8.33934	323.886	up	-3266.08	-11.6733	3266.08	down
C14 H32 O2 nullnullnull 5.5289965	6.92036	153.45	118.521	194.06	211.349	494.157	1925.26	0.935985	0.237051	0.327333	0.163471	0.0480098	0.00295984	5.22817e-08	1	1	1	1	1	1	6.72343e-05	638.993	9.31966	638.993	up	-139.022	-7.11917	139.022	down	20.7584	4.37562	20.7584	up	-1109.21	-10.1153	1109.21	down	26.0893	4.70538	26.0893	up	-328.023	-8.35765	328.023	down	68.0419	6.08835	68.0419	up
C14 H32 O2 nullnullnull 5.5419936	88.2803	281.605	362.505	389.141	18.2702	134.387	4330.44	0.33659	0.0345374	0.0138719	0.0103238	0.500934	0.0706656	4.41121e-16	1	1	1	1	1	1	5.67282e-13	338661	18.3695	338661	up	1.49171	0.576963	1.49171	up	60362.7	15.8814	60362.7	up	-2.17372	-1.12017	2.17372	down	104890	16.6785	104890	up	-1.02406	-0.0342941	1.02406	down	60394.1	15.8821	60394.1	up
C14 H32 O2 nullnullnull 5.5830064	33.1058	196.296	201.334	237.995	2.04419	51.744	5219.85	0.642913	0.0785202	0.0737241	0.0467566	0.815428	0.242355	1.17834e-18	1	1	1	1	1	1	1.51535e-15	4729024	22.1731	4729024	up	5.88037	2.55591	5.88037	up	255041	17.9604	255041	up	1.62433	0.699848	1.62433	up	254654	17.9582	254654	up	3.91581	1.96931	3.91581	up	270801	18.0469	270801	up
C14 H32 O2 nullnullnull 5.710999	42.1201	160.213	404.965	700.624	7.10902	241.757	1846.21	0.66537	0.217401	0.0237393	0.00193397	0.711058	0.0333676	7.17996e-08	1	1	1	1	1	1	9.23343e-05	2445.26	11.2558	2445.26	up	6.56496	2.71479	6.56496	up	33149.2	15.0167	33149.2	up	7.14556	2.83705	7.14556	up	1123300	20.0993	1123300	up	3.67799	1.87892	3.67799	up	26526.7	14.6952	26526.7	up
C14 H33 N7	3.91001	46.2364	75.7487	25.4099	153.319	130.29	1917.99	0.933401	0.446293	0.269128	0.640451	0.022801	0.0353492	5.27864e-12	1	1	1	1	1	1	6.78834e-09	-772.28	-9.59298	772.28	down	1.58473	0.664238	1.58473	up	-127.208	-6.99105	127.208	down	1.40939	0.495071	1.40939	up	-19.7425	-4.30323	19.7425	down	-1.41245	-0.498199	1.41245	down	-3322.46	-11.698	3322.46	down
C14 H35 N4 O	62.2316	3.16491	66.8637	4.70293	96.974	1.40296	4598.72	0.148102	0.905218	0.12898	0.86254	0.0157682	0.76706	3.98499e-27	1	1	1	1	1	1	5.12469e-24	-338.013	-8.40093	338.013	down	22.9533	4.52063	22.9533	up	-1693.98	-10.7262	1693.98	down	17.3608	4.11776	17.3608	up	-9425.01	-13.2023	9425.01	down	30.8859	4.94888	30.8859	up	-7700.27	-12.9107	7700.27	down
C14 H35 N4 O null 5.390996	246.307	793.656	771.702	573.199	154.639	50.7859	505.462	0.00409824	2.10724e-07	2.98641e-07	8.21097e-06	0.00794684	0.122109	4.90689e-06	1	0.000270991	0.000384052	0.0105593	1	1	0.00631026	108.242	6.75812	108.242	up	6.75496	2.75595	6.75496	up	4.59726	2.20078	4.59726	up	213.086	7.73529	213.086	up	3.88193	1.95678	3.88193	up	1.1462e+06	20.1284	1.1462e+06	up	4.75143	2.24836	4.75143	up
C14 H35 N4 O null 9.075993	141.594	367.097	810.057	64.4039	80.5794	13.4516	563.234	0.049378	0.000649308	4.60148e-07	0.246817	0.0628407	0.442681	3.89416e-06	1	0.83501	0.00059175	1	1	1	0.00500789	26.2247	4.71285	26.2247	up	5.05405	2.33744	5.05405	up	1.11381	0.155508	1.11381	up	95.3786	6.57559	95.3786	up	-1.06326	-0.0884914	1.06326	down	17571.9	14.101	17571.9	up	1.15116	0.203094	1.15116	up
C14 H35 N4 O nullnullnull 1.6119996	224.096	84.4056	55.9221	197.073	77.3439	68.841	2654.05	0.000203846	0.032158	0.0989621	0.000514501	0.0122081	0.0177977	4.3864e-24	0.262146	1	1	0.661648	1	1	5.64092e-21	-1237.93	-10.2737	1237.93	down	-1.00409	-0.00588465	1.00409	down	-29147	-14.8311	29147	down	-1.00438	-0.00630438	1.00438	down	-8.00323	-3.00058	8.00323	down	1.5899	0.668937	1.5899	up	-28201.3	-14.7835	28201.3	down
C14 H35 N4 O nullnullnull 7.234005	62.0719	44.6107	77.7078	4.09742	12.5566	0.0298226	1673.83	0.354779	0.473447	0.274523	0.933029	0.516371	0.974734	1.07572e-10	1	1	1	1	1	1	1.38338e-07	-2852.93	-11.4782	2852.93	down	-1.41239	-0.498136	1.41239	down	-2544.39	-11.3131	2544.39	down	-1.85757	-0.893417	1.85757	down	-54.4345	-5.76645	54.4345	down	-1.0388	-0.0549226	1.0388	down	-593.294	-9.2126	593.294	down
C14 O18 S	171.012	95.2674	188.227	160.59	3.00519	1.13464	5676.44	0.00994984	0.0713825	0.00645046	0.0129674	0.678936	0.799165	1.19738e-28	1	1	1	1	1	1	1.53984e-25	11674969	23.4769	11674969	up	1.7694	0.823261	1.7694	up	270615	18.0459	270615	up	1.6457	0.718699	1.6457	up	2570.01	11.3276	2570.01	up	3.67799	1.87892	3.67799	up	895411	19.7722	895411	up
C15 H30 O2	43.4768	852.175	517.854	104.396	1.76958	30.2588	2855.1	0.533938	2.30253e-05	0.00105634	0.225616	0.821073	0.351033	1.1228e-13	1	0.0296105	1	1	1	1	1.44392e-10	99.1341	6.63131	99.1341	up	-4.87738	-2.28611	4.87738	down	4.92372	2.29975	4.92372	up	-2822.09	-11.4625	2822.09	down	2.84406	1.50795	2.84406	up	-33489.3	-15.0314	33489.3	down	4.84136	2.27541	4.84136	up
C15 H30 O2 null 7.244996	135.656	23.8899	114.234	5.88701	109.948	2.32081	4209.12	0.0259181	0.511514	0.0450614	0.846755	0.0148376	0.717978	1.0709e-24	1	1	1	1	1	1	1.37718e-21	-40.0903	-5.32518	40.0903	down	137.294	7.10112	137.294	up	-175.02	-7.45138	175.02	down	128.345	7.00389	128.345	up	-1117.86	-10.1265	1117.86	down	145.032	7.18023	145.032	up	-913.297	-9.83494	913.297	down
C15 H32 N2 O	62.605	77.8896	364.457	40.9426	154.779	50.8663	2942.05	0.37901	0.300234	0.0049076	0.528665	0.0306122	0.210251	1.33239e-14	1	1	1	1	1	1	1.71345e-11	-23.636	-4.56292	23.636	down	4.80513	2.26458	4.80513	up	-556.509	-9.12026	556.509	down	75.4712	6.23785	75.4712	up	-659.057	-9.36426	659.057	down	626.932	9.29217	626.932	up	-538.452	-9.07268	538.452	down
C15 H35 N14 O	192.135	362.772	943.496	411.018	127.213	62.3462	2058.5	0.0661934	0.00695653	8.00501e-06	0.00377021	0.0572426	0.180385	3.77902e-11	1	1	0.0102944	1	1	1	4.85983e-08	-8362.11	-13.0297	8362.11	down	-4.41125	-2.14119	4.41125	down	-36751.4	-15.1655	36751.4	down	-1.07894	-0.109618	1.07894	down	-20117.5	-14.2962	20117.5	down	-27.7204	-4.79288	27.7204	down	-190497	-17.5394	190497	down
C15 N O19	33.992	317.458	297.633	137.312	152.8	5.40075	906.676	0.668035	0.0272014	0.0337251	0.201306	0.0601009	0.720609	1.43213e-05	1	1	1	1	1	1	0.0184172	3.90547	1.9655	3.90547	up	1.50018	0.585132	1.50018	up	-6.02871	-2.59185	6.02871	down	142.562	7.15544	142.562	up	1.24034	0.310733	1.24034	up	11816.3	13.5285	11816.3	up	-5.8331	-2.54426	5.8331	down
C15 N O19 null 1.5449985	54.1774	297.768	749.317	104.48	21.4814	0.454494	1660.29	0.45672	0.0163565	6.90246e-05	0.223901	0.430591	0.908535	1.19454e-09	1	1	0.0887657	1	1	1	1.53618e-06	-6.57686	-2.7174	6.57686	down	-19.9192	-4.31609	19.9192	down	-154.852	-7.27475	154.852	down	15.6458	3.96771	15.6458	up	-183.387	-7.51874	183.387	down	726.47	9.50476	726.47	up	-149.828	-7.22716	149.828	down
C16 H20 N null 6.7969975	21.9546	58.9082	145.341	185.358	27.6751	2.34914	2059.49	0.697775	0.383786	0.0983883	0.0532775	0.342806	0.781652	5.04901e-12	1	1	1	1	1	1	6.49302e-09	-3.22663	-1.69003	3.22663	down	107.385	6.74665	107.385	up	-75.9708	-6.24737	75.9708	down	99.3319	6.63419	99.3319	up	-9.16308	-3.19583	9.16308	down	104.42	6.70625	104.42	up	-73.5058	-6.19979	73.5058	down
C16 H30 N5 O13	166.421	18.3041	57.3638	123.942	35.715	0.437266	1796.03	0.0449183	0.701539	0.333007	0.0967513	0.242224	0.896565	2.95463e-12	1	1	1	1	1	1	3.79965e-09	-75.5613	-6.23958	75.5613	down	2.17674	1.12217	2.17674	up	-446.525	-8.8026	446.525	down	-1.97702	-0.983328	1.97702	down	-2106.92	-11.0409	2106.92	down	5.3542	2.42067	5.3542	up	-433.231	-8.75899	433.231	down
C16 H32 O2	4.0683	42.1165	29.9678	50.5697	28.4677	25.5797	3503.41	0.928638	0.468006	0.581657	0.402612	0.311843	0.337542	1.08813e-17	1	1	1	1	1	1	1.39934e-14	-1263.11	-10.3028	1263.11	down	4.74213	2.24553	4.74213	up	-1090.55	-10.0908	1090.55	down	3.68214	1.88055	3.68214	up	-3431.62	-11.7447	3431.62	down	-1.1817	-0.240864	1.1817	down	-28775	-14.8125	28775	down
C16 H32 O2 null 4.9630065	63.5858	210.742	560.267	84.9843	33.1276	0.199538	3899.17	0.380667	0.044706	0.000434425	0.276596	0.3159	0.937744	4.51046e-17	1	1	0.558671	1	1	1	5.80045e-14	-11.981	-3.58268	11.981	down	1.48595	0.571384	1.48595	up	-282.092	-8.14002	282.092	down	1560.35	10.6077	1560.35	up	-334.074	-8.38402	334.074	down	1515.93	10.566	1515.93	up	-272.94	-8.09244	272.94	down
C16 H33 N4 O	266.32	15.0229	70.3536	84.5149	6.26249	7.87623	2141.17	0.0152209	0.779353	0.315675	0.251378	0.649261	0.610096	2.05912e-12	1	1	1	1	1	1	2.64803e-09	-3.01293	-1.59117	3.01293	down	81.0078	6.33999	81.0078	up	-70.9393	-6.14851	70.9393	down	77.5345	6.27677	77.5345	up	-84.0113	-6.39251	84.0113	down	4.52148	2.1768	4.52148	up	-68.6376	-6.10093	68.6376	down
C16 H34 O2 null 7.432006	143.545	505.874	907.518	111.43	214.895	87.4287	555.451	0.0799472	0.000269307	1.19191e-06	0.1386	0.00656044	0.0784032	2.52138e-05	1	0.346329	0.0015328	1	1	1	0.032425	108.242	6.75812	108.242	up	37.8326	5.24156	37.8326	up	4.59726	2.20078	4.59726	up	174.418	7.4464	174.418	up	3.88193	1.95678	3.88193	up	1.15067e+06	20.134	1.15067e+06	up	4.75143	2.24836	4.75143	up
C16 H40 N7 O2 S	672.439	38.5896	744.516	328.591	247.893	400.949	1033.61	0.000377007	0.605617	0.000177701	0.0171657	0.0129694	0.00180469	1.74419e-06	0.484831	1	0.228524	1	1	1	0.00224303	12.726	3.66971	12.726	up	5119.98	12.3219	5119.98	up	-32.6547	-5.02922	32.6547	down	206.297	7.68858	206.297	up	-3.95312	-1.98299	3.95312	down	2641.49	11.3671	2641.49	up	-31.5952	-4.98163	31.5952	down
C16 N O12 S	82.9924	26.1149	176.339	10.4975	65.805	7.85721	3981.4	0.162143	0.558611	0.0232211	0.790422	0.0896836	0.554142	2.52597e-21	1	1	1	1	1	1	3.2484e-18	-39.4275	-5.30113	39.4275	down	24.7317	4.62829	24.7317	up	-928.319	-9.85848	928.319	down	138.293	7.11159	138.293	up	-1099.38	-10.1025	1099.38	down	115.662	6.85377	115.662	up	-898.199	-9.81089	898.199	down
C16 N O12 S null 1.5390011	133.553	80.2952	286.972	50.3186	64.0446	7.25672	3330.31	0.070339	0.198111	0.00415694	0.35955	0.108468	0.586047	1.92674e-18	1	1	1	1	1	1	2.47778e-15	-3.91378	-1.96856	3.91378	down	48.0238	5.58568	48.0238	up	-92.1498	-6.52591	92.1498	down	1162.37	10.1828	1162.37	up	-109.13	-6.76991	109.13	down	573.459	9.16355	573.459	up	-89.1599	-6.47832	89.1599	down
C17 H28 N8 O14	316.851	4.8164	163.032	193.322	21.7547	0.415722	1189.48	0.00431826	0.914708	0.0548684	0.032791	0.372159	0.901552	4.81257e-09	1	1	1	1	1	1	6.18897e-06	-17.4333	-4.12378	17.4333	down	2.08932	1.06303	2.08932	up	-410.467	-8.68112	410.467	down	-7.07206	-2.82213	7.07206	down	-486.104	-8.92512	486.104	down	5.86238	2.55149	5.86238	up	-397.149	-8.63354	397.149	down
C17 H29	349.908	19.7704	4.67003	59.1056	272.803	82.4032	3550.81	0.00528146	0.728167	0.927575	0.390513	0.00408414	0.107473	1.32947e-16	1	1	1	1	1	1	1.70969e-13	-8989.99	-13.1341	8989.99	down	-1.42945	-0.515457	1.42945	down	-5647.5	-12.4634	5647.5	down	-1.93392	-0.951526	1.93392	down	-84.6285	-6.40307	84.6285	down	8.45758	3.08025	8.45758	up	-922949	-19.8159	922949	down
C17 H30 O3	11.5436	47.7122	13.4453	40.2388	39.2305	12.3999	2319.86	0.731652	0.279582	0.69512	0.34036	0.148466	0.414285	1.439e-17	1	1	1	1	1	1	1.85056e-14	-319.259	-8.31858	319.259	down	-2.10664	-1.07494	2.10664	down	-7516.93	-12.8759	7516.93	down	-1.90643	-0.930871	1.90643	down	-1129.43	-10.1414	1129.43	down	1.30052	0.379093	1.30052	up	-7273.04	-12.8283	7273.04	down
C17 H32 N14 O null 5.414001	202.391	129.536	372.907	63.0799	475.766	119.43	3392.91	0.0582454	0.158028	0.00623432	0.402484	0.000377765	0.0657715	3.06569e-15	1	1	1	1	0.485805	1	3.94247e-12	-12.7753	-3.67529	12.7753	down	356.686	8.47851	356.686	up	-300.794	-8.23263	300.794	down	1285.62	10.3282	1285.62	up	-27.2239	-4.7668	27.2239	down	1503.55	10.5542	1503.55	up	-291.034	-8.18505	291.034	down
C17 H33 N O2 S	37.2374	32.6829	305.375	73.0502	76.9111	10.8918	1474.25	0.550337	0.591733	0.00974191	0.312695	0.11909	0.55468	1.56263e-09	1	1	1	1	1	1	2.00954e-06	-2.76689	-1.46826	2.76689	down	1.00574	0.00825119	1.00574	up	-13.4585	-3.75045	13.4585	down	232.9	7.86357	232.9	up	-77.1508	-6.26961	77.1508	down	334.92	8.38767	334.92	up	-63.0325	-5.97802	63.0325	down
C17 H35 N18	19.8903	89.9507	81.1348	85.8361	9.82396	3.41257	3880.5	0.497464	0.0470561	0.0627922	0.0538232	0.406732	0.624315	1.81577e-26	1	1	1	1	1	1	2.33508e-23	-1166.8	-10.1883	1166.8	down	-2.54504	-1.34769	2.54504	down	-114379	-16.8035	114379	down	-3.32932	-1.73523	3.32932	down	-135456	-17.0475	135456	down	-1.6596	-0.730835	1.6596	down	-110668	-16.7559	110668	down
C17 H35 N20	172.365	494.684	944.294	179.847	0.313022	22.5575	505.299	0.017952	2.69106e-05	1.50935e-08	0.0152235	0.901467	0.295051	3.93848e-06	1	0.034607	1.94102e-05	1	1	1	0.00506489	5.55034	2.47258	5.55034	up	-11.0218	-3.46228	11.0218	down	-4.24207	-2.08477	4.24207	down	1.22384	0.291417	1.22384	up	-5.02376	-2.32877	5.02376	down	8354.69	13.0284	8354.69	up	-4.10444	-2.03718	4.10444	down
C17 H42 N19	106.014	41.7015	42.8221	148.857	11.6869	3.57341	1436.68	0.119739	0.427559	0.418021	0.0525319	0.4898	0.702222	5.23502e-11	1	1	1	1	1	1	6.73223e-08	-68.5652	-6.09941	68.5652	down	-2.60601	-1.38184	2.60601	down	-1614.36	-10.6568	1614.36	down	-29.2002	-4.86791	29.2002	down	-1911.85	-10.9008	1911.85	down	5.89196	2.55875	5.89196	up	-1561.99	-10.6092	1561.99	down
C17 O20 S	151.073	8.59412	73.2003	219.606	29.497	30.18	5691.39	0.0267935	0.805877	0.165519	0.00579804	0.226777	0.221528	5.44404e-27	1	1	1	1	1	1	7.00104e-24	13213139	23.6555	13213139	up	1.7694	0.823261	1.7694	up	70910	16.1137	70910	up	1.6457	0.718699	1.6457	up	186897	17.5119	186897	up	3.67799	1.87892	3.67799	up	652211	19.315	652211	up
C18 H12 N8 O10	119.588	373.522	168.016	61.2874	31.301	0.118559	1713.35	0.173117	0.00540807	0.087099	0.402797	0.335354	0.95257	4.92888e-10	1	1	1	1	1	1	6.33854e-07	2020.4	10.9804	2020.4	up	6.72685	2.74993	6.72685	up	101.476	6.66499	101.476	up	2.62912	1.39458	2.62912	up	60.9839	5.93036	60.9839	up	-236.441	-7.88534	236.441	down	111.232	6.79743	111.232	up
C18 H35 N O2	38.613	528.857	148.045	189.411	58.8468	464.213	875.03	0.600185	0.00159873	0.146647	0.0872857	0.214639	0.000757444	7.39825e-06	1	1	1	1	1	0.974074	0.00951415	-538.872	-9.0738	538.872	down	-1.15409	-0.206757	1.15409	down	-2063.93	-11.0112	2063.93	down	-1418.7	-10.4704	1418.7	down	-673.629	-9.39581	673.629	down	-11240.2	-13.4564	11240.2	down	-43023.7	-15.3928	43023.7	down
C18 H35 N2 S	30.4853	8.14642	10.8462	25.4857	59.496	64.7518	3869.87	0.57132	0.860332	0.818603	0.625887	0.142145	0.125937	6.96285e-19	1	1	1	1	1	1	8.95423e-16	-4064.02	-11.9887	4064.02	down	-1.18655	-0.246771	1.18655	down	-15566.8	-13.9262	15566.8	down	1.05951	0.0834017	1.05951	up	-984.161	-9.94275	984.161	down	1.27354	0.348841	1.27354	up	-92582.6	-16.4985	92582.6	down
C18 H39 N O2	48.5459	42.6435	288.126	159.625	350.211	179.693	1045.25	0.435528	0.48136	0.00930704	0.069617	0.000842101	0.0148656	6.50319e-08	1	1	1	1	1	1	8.3631e-05	-3.66474	-1.87371	3.66474	down	1.23108	0.299927	1.23108	up	-86.2861	-6.43106	86.2861	down	79.5217	6.31328	79.5217	up	-102.186	-6.67506	102.186	down	459.104	8.84268	459.104	up	-83.4865	-6.38347	83.4865	down
C18 H43 N17 S2	29.8645	528.393	322.129	28.4969	1.718	59.8773	1340.7	0.75737	0.00976127	0.0554983	0.767034	0.858314	0.293702	3.74571e-06	1	1	1	1	1	1	0.00481698	20.5733	4.3627	20.5733	up	-8.48148	-3.08432	8.48148	down	-1.36663	-0.450626	1.36663	down	-53.1982	-5.7333	53.1982	down	5.06618	2.3409	5.06618	up	-22314.3	-14.4457	22314.3	down	-1.20585	-0.270051	1.20585	down
C18 H43 N17 S2 nullnullnull 4.5429997	67.6915	33.3816	184.302	331.649	22.534	231.964	1377.52	0.594645	0.77317	0.247037	0.083845	0.556762	0.062163	1.63777e-05	1	1	1	1	1	1	0.0210617	168.697	7.39829	168.697	up	-5976.2	-12.545	5976.2	down	-1.15075	-0.20258	1.15075	down	-38.1961	-5.25535	38.1961	down	42.4281	5.40695	42.4281	up	-21.5784	-4.43151	21.5784	down	6.81284	2.76826	6.81284	up
C18 H43 N17 S2 nullnullnull 4.5769978	84.1385	336.895	294.341	366.835	228.946	302.046	2778.42	0.320339	0.0127914	0.0215738	0.00889459	0.014344	0.00519652	5.75484e-13	1	1	1	1	1	1	7.40072e-10	11273.4	13.4606	11273.4	up	-510.68	-8.99628	510.68	down	399.368	8.64157	399.368	up	-97.5079	-6.60745	97.5079	down	2791.85	11.447	2791.85	up	5.69492	2.50968	5.69492	up	3154.51	11.6232	3154.51	up
C18 H44 N5 O4 S	100.47	39.4223	79.8085	140.009	291.948	138.71	2364.45	0.275189	0.599454	0.35749	0.167658	0.0072479	0.0608061	2.55298e-11	1	1	1	1	1	1	3.28313e-08	-1.42144	-0.50735	1.42144	down	172.083	7.42696	172.083	up	-33.4676	-5.0647	33.4676	down	3969.56	11.9548	3969.56	up	-39.6348	-5.3087	39.6348	down	978.446	9.93435	978.446	up	-32.3818	-5.01711	32.3818	down
C18 N O21	112.967	125.976	322.197	6.32623	112.95	28.2902	2240.75	0.190223	0.157882	0.0105973	0.909411	0.0694456	0.35948	5.74803e-12	1	1	1	1	1	1	7.39196e-09	-1.05807	-0.0814285	1.05807	down	118.283	6.88609	118.283	up	-24.9121	-4.63877	24.9121	down	107.087	6.74264	107.087	up	-29.5027	-4.88277	29.5027	down	3588.55	11.8092	3588.55	up	-24.1038	-4.59119	24.1038	down
C19 H2 O19 S null 1.5440011	84.8383	367.686	745.131	15.7041	63.8285	7.1841	1497.5	0.259334	0.00400757	2.94711e-05	0.775987	0.154611	0.63086	1.19993e-09	1	1	0.0378998	1	1	1	1.54311e-06	19.3324	4.27295	19.3324	up	25.8115	4.68994	25.8115	up	-1.2179	-0.2844	1.2179	down	2608.72	11.3491	2608.72	up	-1.44233	-0.528399	1.44233	down	31806.4	14.957	31806.4	up	-1.17839	-0.236815	1.17839	down
C19 H26 N8 O3	10.6483	3.99996	26.3327	6.87059	93.6564	20.7418	3826.12	0.780728	0.91103	0.543843	0.852225	0.0400807	0.328528	2.71245e-21	1	1	1	1	1	1	3.48821e-18	-2997.66	-11.5496	2997.66	down	1.25028	0.322248	1.25028	up	-2483.76	-11.2783	2483.76	down	-1.05207	-0.0732312	1.05207	down	-7149.08	-12.8035	7149.08	down	4.76378	2.25211	4.76378	up	-68289.7	-16.0594	68289.7	down
C19 H32 N4 O20	271.562	12.9382	159.064	127.163	73.2734	10.5692	1535.56	0.00544614	0.766441	0.0431583	0.0793496	0.0862627	0.511054	1.67026e-11	1	1	1	1	1	1	2.14795e-08	-5.71075	-2.51368	5.71075	down	25.5492	4.67521	25.5492	up	-134.459	-7.07103	134.459	down	1.48735	0.572747	1.48735	up	-159.236	-7.31503	159.236	down	68.2752	6.09329	68.2752	up	-130.097	-7.02344	130.097	down
C19 H34 N11 O2 null 7.3980064	104.635	75.2995	92.0212	102.342	346.488	1.60015	2757.98	0.212236	0.325602	0.25496	0.219415	0.00181029	0.826432	1.03409e-13	1	1	1	1	1	1	1.32983e-10	-1115.76	-10.1238	1115.76	down	5.11157	2.35377	5.11157	up	-794.619	-9.63412	794.619	down	4.61723	2.20703	4.61723	up	-216.891	-7.76083	216.891	down	4.07575	2.02706	4.07575	up	-25418.1	-14.6336	25418.1	down
C19 H38 N8 O3 null 5.414001	41.944	23.8615	63.6334	3.47545	117.339	0.505862	6284.87	0.376749	0.572048	0.229718	0.921378	0.021333	0.877658	2.03757e-27	1	1	1	1	1	1	2.62031e-24	-6264.97	-12.6131	6264.97	down	7.82178	2.9675	7.82178	up	-147508	-17.1704	147508	down	7.32346	2.87253	7.32346	up	-9847.07	-13.2655	9847.07	down	10.517	3.39465	10.517	up	-142722	-17.1229	142722	down
C19 H38 N8 O3 null 5.4149985	77.565	670.458	1228.54	35.0375	374.241	197.019	1125.86	0.365067	0.000367353	1.52324e-06	0.632147	0.00243939	0.0256394	6.60981e-07	1	0.472416	0.00195889	1	1	1	0.000850022	108.242	6.75812	108.242	up	69.9854	6.12898	69.9854	up	4.59726	2.20078	4.59726	up	18577.6	14.1813	18577.6	up	3.88193	1.95678	3.88193	up	5.07701e+06	22.2755	5.07701e+06	up	4.75143	2.24836	4.75143	up
C19 H38 N8 O3 nullnullnull 4.8500023	15.1554	12.8487	24.055	23.9832	186.459	96.7477	4225.04	0.796902	0.824844	0.697898	0.698644	0.0205761	0.0924185	1.22992e-17	1	1	1	1	1	1	1.58168e-14	-1111.06	-10.1177	1111.06	down	5.23563	2.38836	5.23563	up	-598.668	-9.22561	598.668	down	4.36039	2.12446	4.36039	up	-910.339	-9.83026	910.339	down	8.13427	3.02401	8.13427	up	-124443	-16.9251	124443	down
C19 H39 N3	36.4659	42.9636	47.9087	545.601	28.4896	31.1782	1014.91	0.682178	0.637503	0.605525	0.0047871	0.440793	0.420097	1.57659e-05	1	1	1	1	1	1	0.0202749	-13.8858	-3.79554	13.8858	down	23.6727	4.56515	23.6727	up	-213.454	-7.73778	213.454	down	24.2717	4.6012	24.2717	up	8.86732	3.1485	8.86732	up	-1.0472	-0.0665407	1.0472	down	-50.3075	-5.6527	50.3075	down
C19 H41 N O2 S null 1.2539991	21.3318	21.8514	75.1827	1.21733	35.6577	0.598903	3721.13	0.572315	0.564647	0.145141	0.968432	0.17453	0.859452	2.23456e-22	1	1	1	1	1	1	2.87364e-19	-538.129	-9.07181	538.129	down	4.55419	2.1872	4.55419	up	-2400.7	-11.2292	2400.7	down	5.71436	2.51459	5.71436	up	-15005	-13.8732	15005	down	4.70338	2.2337	4.70338	up	-12259.1	-13.5816	12259.1	down
C19 H46 N6 O2 S2	205.299	252.381	631.621	437.696	11.3695	0.409869	1317.57	0.144322	0.0938996	0.00350136	0.0181377	0.640296	0.929251	3.12659e-06	1	1	1	1	1	1	0.0040208	2386.95	11.221	2386.95	up	205.339	7.68187	205.339	up	186169	17.5063	186169	up	1.6457	0.718699	1.6457	up	406.647	8.66763	406.647	up	21.2975	4.41261	21.2975	up	26.1451	4.70847	26.1451	up
C20 H34 N	340.817	165.448	5.32927	463.516	506.185	295.483	581.016	0.000573656	0.0220651	0.878742	5.45689e-05	4.45454e-06	0.000308074	1.11894e-06	0.737722	1	1	0.0701756	0.00572853	0.396183	0.00143895	-12.7085	-3.66772	12.7085	down	18.5223	4.21119	18.5223	up	-299.221	-8.22507	299.221	down	-15.3405	-3.93927	15.3405	down	-354.359	-8.46907	354.359	down	115.062	6.84626	115.062	up	-289.513	-8.17748	289.513	down
C20 H35 N18 O6	105.978	11.7426	42.6003	112.223	7.44068	0.00503845	6372.4	0.0368373	0.683286	0.255868	0.0306	0.488303	0.985588	7.41897e-32	1	1	1	1	1	1	9.54079e-29	7987474	22.9293	7987474	up	1.7694	0.823261	1.7694	up	494244	18.9149	494244	up	1.6457	0.718699	1.6457	up	25754.9	14.6526	25754.9	up	3.67799	1.87892	3.67799	up	664715	19.3424	664715	up
C20 H35 N19	247.786	514.363	225.184	17.1241	106.924	141.478	1204.17	0.0201515	0.000459484	0.0282929	0.753001	0.0632901	0.0333166	1.78056e-08	1	0.590897	1	1	1	1	2.2898e-05	49.8971	5.64089	49.8971	up	1.05492	0.0771358	1.05492	up	4.94643	2.30639	4.94643	up	-138.155	-7.11014	138.155	down	1.15446	0.207216	1.15446	up	-57876.7	-15.8207	57876.7	down	7.21145	2.85029	7.21145	up
C20 O22 S	37.0622	28.482	36.7518	44.2806	1.34388	20.5447	3913.03	0.623271	0.694984	0.625727	0.568846	0.853144	0.469958	2.30088e-15	1	1	1	1	1	1	2.95893e-12	140844	17.1037	140844	up	1.7694	0.823261	1.7694	up	70088.9	16.0969	70088.9	up	1.6457	0.718699	1.6457	up	29838.5	14.8649	29838.5	up	3.67799	1.87892	3.67799	up	105040	16.6806	105040	up
C21 H42 N21 O3	93.4892	125.732	353.658	103.936	95.745	20.0344	1142.41	0.298695	0.1987	0.012594	0.261611	0.11699	0.470381	5.78456e-07	1	1	1	1	1	1	0.000743894	-1.08435	-0.116837	1.08435	down	3.4927	1.80434	3.4927	up	-25.5311	-4.67418	25.5311	down	6.02916	2.59196	6.02916	up	-30.2357	-4.91818	30.2357	down	2639.23	11.3659	2639.23	up	-24.7027	-4.6266	24.7027	down
C21 H46 N23 O	29.9703	56.2736	117.264	35.5154	10.032	0.135854	6248.9	0.361324	0.151284	0.0216918	0.300216	0.408505	0.923197	2.45928e-32	1	1	1	1	1	1	3.16263e-29	7189149	22.7774	7189149	up	1.7694	0.823261	1.7694	up	412782	18.655	412782	up	1.6457	0.718699	1.6457	up	29318.9	14.8395	29318.9	up	3.67799	1.87892	3.67799	up	87326.4	16.4141	87326.4	up
C21 H6 N2 O20 S3	25.2383	16.5625	43.8657	3.51535	28.3621	23.9884	4265.35	0.2333	0.382267	0.0826135	0.813643	0.0718163	0.0972211	1.92336e-34	1	1	1	1	1	1	2.47344e-31	-3386.43	-11.7256	3386.43	down	-1.12629	-0.171582	1.12629	down	-79733.5	-16.2829	79733.5	down	-1.3687	-0.452804	1.3687	down	-9785.68	-13.2565	9785.68	down	-1.35464	-0.437906	1.35464	down	-77146.4	-16.2353	77146.4	down
C21 H6 N2 O20 S3 nullnullnull 1.5630022	116.341	17.7673	47.4694	43.6641	94.9898	94.8164	3391.14	0.0305311	0.574134	0.231289	0.259535	0.0168934	0.0169901	2.29338e-23	1	1	1	1	1	1	2.94928e-20	-5441.3	-12.4097	5441.3	down	-1.67134	-0.741003	1.67134	down	-27233.9	-14.7331	27233.9	down	-2.21908	-1.14996	2.21908	down	-182.775	-7.51392	182.775	down	-1.40723	-0.49286	1.40723	down	-123958	-16.9195	123958	down
C22 H2 O21 S	117.163	659.791	336.943	261.108	434.212	30.4829	1696.31	0.11182	1.82805e-05	0.00253788	0.00896796	0.000109396	0.281958	9.70916e-12	1	0.0235088	1	1	0.140683	1	1.2486e-08	108.242	6.75812	108.242	up	20297.2	14.309	20297.2	up	4.59726	2.20078	4.59726	up	49371.3	15.5914	49371.3	up	392.522	8.61663	392.522	up	443263	18.7578	443263	up	4.75143	2.24836	4.75143	up
C22 H2 O21 S null 1.5599986	5.10021	313.737	307.494	72.5028	375.772	78.3842	817.724	0.934499	0.0192638	0.0207551	0.386194	0.00228984	0.153105	1.37403e-05	1	1	1	1	1	1	0.01767	23.2301	4.53792	23.2301	up	36.0364	5.17138	36.0364	up	-1.01355	-0.0194244	1.01355	down	2329.67	11.1859	2329.67	up	9.26607	3.21196	9.26607	up	80392.8	16.2948	80392.8	up	1.01971	0.028161	1.01971	up
C22 H2 O21 S null 2.311998	45.7376	114.464	346.816	231.436	134.224	39.395	968.403	0.574394	0.253589	0.0181709	0.0656908	0.0742855	0.329824	6.43048e-06	1	1	1	1	1	1	0.0082696	-1.40211	-0.487601	1.40211	down	-4.1321	-2.04688	4.1321	down	-33.0126	-5.04495	33.0126	down	19.9733	4.32	19.9733	up	-39.0959	-5.28895	39.0959	down	3544.32	11.7913	3544.32	up	-31.9415	-4.99736	31.9415	down
C22 H2 O21 S null 2.3150017	135.604	43.9935	206.398	10.146	16.2685	7.75408	2334.2	0.208458	0.59683	0.0943628	0.887204	0.537173	0.669871	1.67145e-10	1	1	1	1	1	1	2.14948e-07	-186.438	-7.54255	186.438	down	-5.92297	-2.56632	5.92297	down	-4389.68	-12.0999	4389.68	down	-1.34308	-0.42555	1.34308	down	-454.354	-8.82767	454.354	down	28.2487	4.82011	28.2487	up	-4247.25	-12.0523	4247.25	down
C22 H33 N17 O4	408.947	73.1756	249.016	181.229	87.5807	0.909918	4416.71	0.00109504	0.267912	0.013564	0.0416278	0.077319	0.855595	3.32095e-20	1	1	1	1	1	1	4.27074e-17	1.13555e+06	20.115	1.13555e+06	up	1.7694	0.823261	1.7694	up	471556	18.8471	471556	up	1.6457	0.718699	1.6457	up	265.106	8.05043	265.106	up	3.67799	1.87892	3.67799	up	432766	18.7232	432766	up
C22 H33 N8	14.5266	15.2108	126.255	21.1075	373.546	111.342	1735.95	0.840875	0.834057	0.227754	0.777591	0.00381126	0.107009	1.10026e-08	1	1	1	1	1	1	1.41493e-05	-5.69606	-2.50996	5.69606	down	104.093	6.70173	104.093	up	-5.06055	-2.3393	5.06055	down	105.434	6.7202	105.434	up	-158.827	-7.31131	158.827	down	574.587	9.16638	574.587	up	-129.762	-7.01972	129.762	down
C22 H35 N19	385.643	64.5769	24.8113	96.2601	39.9225	1.68107	2368.06	0.0741424	0.638391	0.841062	0.513246	0.457329	0.878559	1.90342e-07	1	1	1	1	1	1	0.00024478	777.12	9.60199	777.12	up	-26.2849	-4.71616	26.2849	down	844.61	9.72214	844.61	up	3.95059	1.98207	3.95059	up	341.725	8.41669	341.725	up	-2.06492	-1.04609	2.06492	down	163.214	7.35062	163.214	up
C22 H39 N19	191.114	850.584	650.932	483.922	3.6884	51.8809	3015.3	0.0667982	2.14303e-05	0.00020413	0.00150623	0.742891	0.220817	3.12114e-14	1	0.0275594	0.262511	1	1	1	4.01378e-11	48.3458	5.59532	48.3458	up	-22.2197	-4.47377	22.2197	down	1.71753	0.780335	1.71753	up	-55136.3	-15.7507	55136.3	down	-4.22745	-2.07979	4.22745	down	-115326	-16.8154	115326	down	2.65023	1.40612	2.65023	up
C22 H45 N11 S null 7.4030104	122.236	23.6599	175.6	537.819	5.18324	41.3847	1577.58	0.375023	0.825386	0.246399	0.0160687	0.772371	0.414641	2.96072e-06	1	1	1	1	1	1	0.00380749	-11.5303	-3.52736	11.5303	down	1.11563	0.157865	1.11563	up	-42.4043	-5.40614	42.4043	down	211.122	7.72193	211.122	up	-1.75941	-0.815094	1.75941	down	22.9815	4.5224	22.9815	up	-262.673	-8.03712	262.673	down
C22 H48 N19 O3	100.842	28.9229	115.981	338.915	213.831	86.7508	900.21	0.276933	0.688729	0.22926	0.0158074	0.0212566	0.138061	7.30773e-06	1	1	1	1	1	1	0.00939775	-5.60893	-2.48773	5.60893	down	-3.88964	-1.95964	3.88964	down	-132.062	-7.04507	132.062	down	3.93419	1.97607	3.93419	up	-156.397	-7.28907	156.397	down	642.041	9.32652	642.041	up	-127.777	-6.99749	127.777	down
C22 H49 N5 O5 S nullnullnull 4.5440044	27.2009	20.8761	20.8965	27.8828	2.28546	11.6894	203.077	0.0898171	0.155108	0.154833	0.0847209	0.519642	0.147678	4.63057e-08	1	1	1	1	1	1	5.95491e-05	83.1654	6.37791	83.1654	up	-1.6088	-0.685981	1.6088	down	3.07667	1.62137	3.07667	up	-1.47731	-0.562977	1.47731	down	3.50748	1.81043	3.50748	up	-1.62442	-0.699927	1.62442	down	5.20308	2.37936	5.20308	up
C22 H50 N22 O6	514.587	92.4167	197.496	359.004	450.911	65.1002	645.085	0.00094602	0.258609	0.0589151	0.00677571	0.000463402	0.167776	3.82015e-05	1	1	1	1	0.595935	1	0.0491272	4.81941	2.26886	4.81941	up	15549.8	13.9246	15549.8	up	-1.05258	-0.0739346	1.05258	down	705.907	9.46334	705.907	up	1.39644	0.481755	1.39644	up	2.94892	1.56019	2.94892	up	-4.72692	-2.2409	4.72692	down
C23 H27 N2	121.435	89.8511	276.546	369.03	0.153555	32.4993	571.014	0.110017	0.192862	0.00786703	0.0017789	0.939742	0.273414	1.57929e-05	1	1	1	1	1	1	0.0203097	-9.19942	-3.20154	9.19942	down	-562.77	-9.1364	562.77	down	-216.6	-7.75889	216.6	down	-11.6606	-3.54358	11.6606	down	-256.513	-8.00289	256.513	down	56.6902	5.82503	56.6902	up	-209.572	-7.7113	209.572	down
C23 H29 N2 O	35.3426	21.764	197.093	27.2946	81.1996	13.7057	3635.01	0.489652	0.643156	0.0220426	0.575404	0.0728157	0.456956	2.95303e-19	1	1	1	1	1	1	3.7976e-16	-112.16	-6.80942	112.16	down	3.52814	1.81891	3.52814	up	-2640.81	-11.3668	2640.81	down	17.834	4.15656	17.834	up	-3127.43	-11.6108	3127.43	down	113.256	6.82344	113.256	up	-2555.12	-11.3192	2555.12	down
C23 H29 N2 O2	16.8076	1.1248	87.5897	64.686	0.51368	7.25338	1271.92	0.814153	0.986299	0.346804	0.456104	0.910922	0.67437	3.76754e-07	1	1	1	1	1	1	0.000484506	-41.3497	-5.36981	41.3497	down	-3.90594	-1.96567	3.90594	down	-226.543	-7.82364	226.543	down	-3.76008	-1.91076	3.76008	down	-1152.98	-10.1712	1152.98	down	5.47592	2.4531	5.47592	up	-207.163	-7.69462	207.163	down
C23 H31 N2 O	32.8368	4.93915	213.165	116.7	5.3284	17.0297	2445.73	0.583496	0.921695	0.0346217	0.152661	0.675952	0.455498	1.93321e-13	1	1	1	1	1	1	2.4861e-10	-98.4398	-6.62117	98.4398	down	-4.44333	-2.15164	4.44333	down	-2317.76	-11.1785	2317.76	down	16.6215	4.05498	16.6215	up	-2744.86	-11.4225	2744.86	down	23.1233	4.53127	23.1233	up	-2242.56	-11.1309	2242.56	down
C23 H31 N8	68.6296	307.81	604.661	332.117	95.9686	12.3119	2535.63	0.345791	0.010689	0.000216408	0.00764273	0.0867924	0.536025	2.59574e-13	1	1	0.278301	1	1	1	3.33812e-10	1.04507e+06	19.9952	1.04507e+06	up	-14.3473	-3.84271	14.3473	down	44097.5	15.4284	44097.5	up	811.266	9.66403	811.266	up	37970.1	15.2126	37970.1	up	12764.6	13.6399	12764.6	up	54509	15.7342	54509	up
C23 H31 N8 nullnullnull 7.1950064	553.322	97.0617	332.197	554.203	58.7432	4.91608	3469.2	0.000802617	0.257881	0.0117515	0.000794384	0.200164	0.709499	3.36462e-15	1	1	1	1	1	1	4.3269e-12	26087858	24.6369	26087858	up	1.7694	0.823261	1.7694	up	1.08725e+06	20.0522	1.08725e+06	up	20802.1	14.3444	20802.1	up	972700	19.8916	972700	up	427.901	8.74113	427.901	up	200016	17.6098	200016	up
C23 H31 N8 nullnullnull 7.4199967	354.309	194.103	377.896	426.786	141.414	27.9375	899.452	0.0241514	0.124098	0.0190956	0.0117911	0.0810826	0.434269	2.90056e-05	1	1	1	1	1	1	0.0373012	82008.9	16.3235	82008.9	up	4.68834	2.22908	4.68834	up	12676.4	13.6299	12676.4	up	16426.8	14.0038	16426.8	up	87982.1	16.4249	87982.1	up	13351.2	13.7047	13351.2	up	2513.9	11.2957	2513.9	up
C23 H31 N8 nullnullnull 9.466001	31.6161	427.411	159.77	194.572	121.141	371.581	3658.37	0.496372	0.000205227	0.0330597	0.0163803	0.0226885	0.000114828	2.52316e-20	1	0.263922	1	1	1	0.147669	3.24479e-17	2724.18	11.4116	2724.18	up	-126.686	-6.98512	126.686	down	184.618	7.5284	184.618	up	-1784.89	-10.8016	1784.89	down	104.745	6.71074	104.745	up	-798.638	-9.6414	798.638	down	115.748	6.85484	115.748	up
C23 H33 N17 O2	30.0729	30.1116	133.871	384.013	12.1378	218.459	1548.24	0.659326	0.658975	0.162223	0.0067926	0.562682	0.0159691	6.52739e-09	1	1	1	1	1	1	8.39422e-06	-4368.18	-12.0928	4368.18	down	-1.16788	-0.22389	1.16788	down	-630.556	-9.30048	630.556	down	-1.48733	-0.572721	1.48733	down	-11.0349	-3.464	11.0349	down	-209.641	-7.71178	209.641	down	-17957.4	-14.1323	17957.4	down
C23 H33 N17 O2 null 4.7659965	261.539	36.4422	175.202	159.144	113.01	28.3198	3293.06	0.00313533	0.423167	0.019049	0.0269146	0.0229595	0.248631	6.89644e-20	1	1	1	1	1	1	8.86882e-17	-818.594	-9.677	818.594	down	4.28842	2.10045	4.28842	up	-19273.8	-14.2343	19273.8	down	-1.29301	-0.370737	1.29301	down	-22825.4	-14.4784	22825.4	down	3.05337	1.6104	3.05337	up	-18648.4	-14.1868	18648.4	down
C23 H33 N21	150.73	442.519	76.5971	382.269	4.24982	201.844	3589.83	0.170479	0.00695767	0.402625	0.0131676	0.750096	0.0307233	5.28481e-14	1	1	1	1	1	1	6.79627e-11	760902	19.5374	760902	up	-7.57471	-2.92119	7.57471	down	2041.1	10.9951	2041.1	up	1.75973	0.815354	1.75973	up	28979	14.8227	28979	up	-3.64403	-1.86553	3.64403	down	315.336	8.30075	315.336	up
C23 H34 N9	244.952	7.48238	39.6762	405.655	165.694	91.011	2327.77	0.023463	0.88646	0.530161	0.00243004	0.0235865	0.0908317	7.86352e-13	1	1	1	1	1	1	1.01125e-09	-3031.41	-11.5658	3031.41	down	2.03319	1.02374	2.03319	up	-2114.95	-11.0464	2114.95	down	2.84732	1.50961	2.84732	up	-3.85986	-1.94855	3.85986	down	-2.52374	-1.33556	2.52374	down	-69058.6	-16.0755	69058.6	down
C23 H35 N19 O2	103.41	276.728	190.939	29.3541	10.0669	8.36578	3130.13	0.190451	0.0138534	0.0495159	0.619743	0.567234	0.601911	1.4375e-15	1	1	1	1	1	1	1.84862e-12	7012.74	12.7758	7012.74	up	-1.80574	-0.852587	1.80574	down	11219.4	13.4537	11219.4	up	-6.8497	-2.77604	6.8497	down	205.444	7.6826	205.444	up	-3.06486	-1.61582	3.06486	down	4662.97	12.187	4662.97	up
C23 H38 N5 O4	420.867	67.2214	85.4896	353.154	37.5012	43.7998	1848.9	0.000176607	0.217616	0.145339	0.000622294	0.191565	0.158539	6.18413e-14	0.227117	1	1	0.80027	1	1	7.9528e-11	-6029.97	-12.5579	6029.97	down	-1.45427	-0.540292	1.45427	down	-7228.11	-12.8194	7228.11	down	-1.57613	-0.656387	1.57613	down	-1.47207	-0.557842	1.47207	down	-1.44198	-0.528046	1.44198	down	-1249.29	-10.2869	1249.29	down
C23 H39 N11 O3	377.121	86.2886	134.569	369.079	58.0201	65.5462	3919.78	0.000504227	0.15232	0.055364	0.00058376	0.111385	0.0909867	4.23795e-21	0.648435	1	1	0.750715	1	1	5.45e-18	-25667.8	-14.6477	25667.8	down	-1.09811	-0.13502	1.09811	down	-604348	-19.205	604348	down	-1.26765	-0.342151	1.26765	down	-13.1978	-3.72222	13.1978	down	-1.76698	-0.821284	1.76698	down	-77404.5	-16.2401	77404.5	down
C23 H42 N12 O2	275.748	46.8687	9.42646	113.8	5.81727	12.3503	3282.63	0.0738244	0.633634	0.911896	0.333487	0.73663	0.624258	1.29294e-11	1	1	1	1	1	1	1.66272e-08	624807	19.2531	624807	up	8.08894	3.01595	8.08894	up	22841.4	14.4794	22841.4	up	30.7586	4.94292	30.7586	up	3807.37	11.8946	3807.37	up	3.67799	1.87892	3.67799	up	135042	17.043	135042	up
C23 H42 N2 O5 nullnullnull 7.1580043	279.711	112.071	50.4309	25.4529	12.0353	42.5804	5916.43	0.0391929	0.263798	0.545707	0.735692	0.590905	0.313205	6.87341e-19	1	1	1	1	1	1	8.8392e-16	18308024	24.126	18308024	up	8.04102	3.00738	8.04102	up	629939	19.2649	629939	up	1.87069	0.903567	1.87069	up	47059.4	15.5222	47059.4	up	-1.44156	-0.527627	1.44156	down	599598	19.1936	599598	up
C23 H42 N2 O5 nullnullnull 7.4199967	832.166	62.9459	89.982	2538	9.25047	21.0066	2709.19	0.000738763	0.549862	0.426563	8.08401e-09	0.674995	0.527793	4.33976e-10	0.95005	1	1	1.0396e-05	1	1	5.58093e-07	962072	19.8758	962072	up	10.1872	3.34869	10.1872	up	129239	16.9797	129239	up	137632	17.0705	137632	up	9183322	23.1306	9183322	up	3.67799	1.87892	3.67799	up	1.34891e+06	20.3634	1.34891e+06	up
C23 H43 N11 O3	551.034	73.2194	88.3511	553.52	23.31	23.5694	2857.64	0.00217768	0.416344	0.348284	0.00212298	0.4548	0.452312	3.5235e-12	1	1	1	1	1	1	4.53122e-09	-128727	-16.974	128727	down	-1.06576	-0.0918779	1.06576	down	-5026.32	-12.2953	5026.32	down	-1.06426	-0.0898447	1.06426	down	-13.4359	-3.74802	13.4359	down	-1.40649	-0.492101	1.40649	down	-2.93254e+06	-21.4837	2.93254e+06	down
C23 H46 N18 O2 nullnullnull 1.1989994	138.189	72.2448	12.2374	175.102	69.8373	2.92831	2147.19	0.0897688	0.278023	0.802513	0.0483947	0.116826	0.746128	4.41927e-13	1	1	1	1	1	1	5.68318e-10	-1526.55	-10.5761	1526.55	down	-18.9866	-4.24691	18.9866	down	-35942.6	-15.1334	35942.6	down	-21.3076	-4.4133	21.3076	down	-4738.83	-12.2103	4738.83	down	1.35497	0.438261	1.35497	up	-34776.4	-15.0858	34776.4	down
C23 H46 N3	43.7249	216.248	294.721	56.2113	63.0406	115.317	3035.93	0.470509	0.0277232	0.00819562	0.380445	0.142619	0.0487235	7.58665e-16	1	1	1	1	1	1	9.75643e-13	1653.06	10.6909	1653.06	up	1.7694	0.823261	1.7694	up	126956	16.954	126956	up	1.6457	0.718699	1.6457	up	39.3136	5.29696	39.3136	up	3.67799	1.87892	3.67799	up	141003	17.1054	141003	up
C23 H46 N3 null 0.7649995	305.584	178.044	281.695	262.272	0.844959	13.8232	2243.05	0.0131705	0.0754199	0.018148	0.023601	0.87376	0.521012	5.55336e-12	1	1	1	1	1	1	7.14162e-09	31062.6	14.9229	31062.6	up	1.7694	0.823261	1.7694	up	660.128	9.3666	660.128	up	1.6457	0.718699	1.6457	up	288.944	8.17465	288.944	up	3.67799	1.87892	3.67799	up	25072.6	14.6138	25072.6	up
C23 O24 S	78.4081	46.6524	73.9903	66.8659	18.6914	2.32442	4990.97	0.272714	0.459022	0.293071	0.329249	0.429694	0.780234	1.21968e-20	1	1	1	1	1	1	1.56851e-17	485864	18.8902	485864	up	1.7694	0.823261	1.7694	up	252185	17.9441	252185	up	1.6457	0.718699	1.6457	up	25090.4	14.6148	25090.4	up	3.67799	1.87892	3.67799	up	762012	19.5395	762012	up
C23 O24 S null 1.5759999	162.435	23.2436	534.978	128.265	94.9753	22.5754	2619.95	0.0969791	0.709523	0.000761272	0.156506	0.0975118	0.415807	4.11946e-13	1	1	0.978996	1	1	1	5.29762e-10	6465.01	12.6584	6465.01	up	1.7694	0.823261	1.7694	up	94022.6	16.5207	94022.6	up	1.6457	0.718699	1.6457	up	2829.33	11.4662	2829.33	up	3.67799	1.87892	3.67799	up	18785.4	14.1973	18785.4	up
C24 H34 N9	110.773	34.6496	51.6358	98.7531	109.267	58.5887	400.448	0.054364	0.392155	0.249979	0.0737504	0.0168786	0.0774866	1.28164e-05	1	1	1	1	1	1	0.0164818	5553.61	12.4392	5553.61	up	1.7694	0.823261	1.7694	up	18.8243	4.23452	18.8243	up	1.6457	0.718699	1.6457	up	35.7	5.15785	35.7	up	3.67799	1.87892	3.67799	up	25.0587	4.64724	25.0587	up
C24 H37 N12 O4	2.94309	319.954	76.7703	226.366	63.5775	43.9039	5386.76	0.964182	0.0231413	0.390737	0.0669267	0.213245	0.300185	3.71844e-18	1	1	1	1	1	1	4.78192e-15	84474.2	16.3662	84474.2	up	-17.8989	-4.1618	17.8989	down	3311.73	11.6934	3311.73	up	-358.434	-8.48556	358.434	down	196.104	7.61548	196.104	up	-30.4682	-4.92923	30.4682	down	5640.63	12.4616	5640.63	up
C24 H38 N6 O null 4.8039947	43.8295	386.618	11.7961	330.348	77.7688	6.17818	6877.1	0.518539	0.0044179	0.83701	0.00926709	0.129472	0.666848	4.65559e-23	1	1	1	1	1	1	5.98709e-20	110664	16.7558	110664	up	-38.1531	-5.25373	38.1531	down	5769.78	12.4943	5769.78	up	-209.969	-7.71403	209.969	down	27.1126	4.76089	27.1126	up	-93.9493	-6.55381	93.9493	down	12412.5	13.5995	12412.5	up
C24 H38 N6 O nullnullnull 5.421	150.941	451.804	370.576	135.276	298.179	263.763	1040.92	0.1885	0.00837006	0.0189096	0.223356	0.0113585	0.0169946	6.71047e-06	1	1	1	1	1	1	0.00862966	4.52621	2.1783	4.52621	up	-33.1786	-5.05218	33.1786	down	-1.35735	-0.440795	1.35735	down	-41.3464	-5.36969	41.3464	down	1.03216	0.0456674	1.03216	up	-1.10313e+06	-20.0732	1.10313e+06	down	1.98533	0.989381	1.98533	up
C24 H40 N22	31.7993	48.1859	78.5878	40.9116	73.4711	75.5827	3794.76	0.399995	0.251665	0.108172	0.308915	0.0419243	0.0391632	8.32719e-24	1	1	1	1	1	1	1.07088e-20	-568.406	-9.15078	568.406	down	1.6802	0.748634	1.6802	up	-53967.2	-15.7198	53967.2	down	1.5639	0.645146	1.5639	up	-1037.42	-10.0188	1037.42	down	-2.1057	-1.0743	2.1057	down	-52216.2	-15.6722	52216.2	down
C24 H41 N12	386.492	297.633	44.4621	412.558	51.4708	0.540139	1155.75	0.0191314	0.0457747	0.620274	0.0148697	0.294905	0.914233	3.8258e-06	1	1	1	1	1	1	0.00491998	697.042	9.4451	697.042	up	-3.98937	-1.99616	3.98937	down	89.345	6.48132	89.345	up	5.53575	2.46878	5.53575	up	161.4	7.3345	161.4	up	-1.25219	-0.32445	1.25219	down	20.8086	4.37911	20.8086	up
C24 H42 N11	110.892	187.821	75.4862	140.597	35.2815	95.7455	5954.42	0.0661701	0.011251	0.154082	0.0330443	0.184612	0.0305041	1.1013e-27	1	1	1	1	1	1	1.41628e-24	2.62124e+06	21.3218	2.62124e+06	up	-2.57452	-1.36431	2.57452	down	188840	17.5268	188840	up	-2.76805	-1.46887	2.76805	down	59993.9	15.8725	59993.9	up	-1.23855	-0.308649	1.23855	down	200634	17.6142	200634	up
C24 H47 N8 O S	53.3917	412.768	205.926	30.124	6.89604	27.7609	4367.13	0.391653	0.001245	0.030504	0.587527	0.621907	0.323661	9.40764e-20	1	1	1	1	1	1	1.20982e-16	158747	17.2764	158747	up	27.6218	4.78774	27.6218	up	27294.8	14.7363	27294.8	up	-10.5579	-3.40026	10.5579	down	25153.8	14.6185	25153.8	up	-4.72409	-2.24004	4.72409	down	26682.8	14.7036	26682.8	up
C24 H47 O2	335.58	160.295	57.9859	81.8199	3.44197	100.785	1502.4	0.000468407	0.0210049	0.235733	0.132282	0.676939	0.0265687	5.73071e-13	0.602372	1	1	1	1	1	7.3697e-10	-42.1249	-5.3966	42.1249	down	9.27178	3.21285	9.27178	up	-263.329	-8.04072	263.329	down	1.82116	0.864861	1.82116	up	-1174.59	-10.1979	1174.59	down	-387.867	-8.59942	387.867	down	-959.649	-9.90636	959.649	down
C24 H48 N12 O S	189.152	730.819	256.172	668.387	161.214	151.294	6711.28	0.00943008	1.96729e-07	0.00206405	5.86168e-07	0.00475979	0.00616072	1.10953e-29	1	0.000252994	1	0.000753812	1	1	1.42685e-26	68650568	26.0328	68650568	up	1.7694	0.823261	1.7694	up	311813	18.2503	311813	up	1.6457	0.718699	1.6457	up	3.75543e+06	21.8405	3.75543e+06	up	3.67799	1.87892	3.67799	up	4.07135e+06	21.9571	4.07135e+06	up
C24 H50 N9 O S	190.559	24.4011	300.055	152.832	342.559	57.2452	2247.57	0.157789	0.785272	0.056885	0.225762	0.0109941	0.289603	3.98996e-09	1	1	1	1	1	1	5.13109e-06	48455.6	15.5644	48455.6	up	-3.46255	-1.79183	3.46255	down	2013.2	10.9753	2013.2	up	7.45008	2.89726	7.45008	up	785.967	9.61832	785.967	up	371.791	8.53835	371.791	up	91.7192	6.51915	91.7192	up
C25 H28 N22 O5	65.7828	10.3553	209.774	385.045	21.0923	116.906	3676.54	0.316909	0.83251	0.0288709	0.00190422	0.389744	0.0452769	6.47703e-18	1	1	1	1	1	1	8.32947e-15	324408	18.3074	324408	up	1.7694	0.823261	1.7694	up	33214.7	15.0195	33214.7	up	1.6457	0.718699	1.6457	up	204247	17.64	204247	up	3.67799	1.87892	3.67799	up	235932	17.848	235932	up
C25 H35 N2	15.2742	26.6475	48.8256	102.523	30.141	38.561	2050.12	0.835042	0.730569	0.563738	0.303219	0.401131	0.342609	1.20905e-09	1	1	1	1	1	1	1.55484e-06	-84.5481	-6.4017	84.5481	down	-4.29334	-2.1021	4.29334	down	-1457.4	-10.5092	1457.4	down	-4.31429	-2.10912	4.31429	down	-8808	-13.1046	8808	down	1.14459	0.194829	1.14459	up	-7196.17	-12.813	7196.17	down
C25 H35 N2 null 1.2679999	74.4627	19.5084	89.1605	1.18032	3.30706	117.129	1210.7	0.499983	0.832867	0.436721	0.98897	0.803814	0.142175	9.17322e-06	1	1	1	1	1	1	0.0117968	-18.7726	-4.23056	18.7726	down	-3.83992	-1.94108	3.83992	down	-50.8459	-5.66806	50.8459	down	1.05533	0.0776985	1.05533	up	-868.814	-9.7629	868.814	down	-3.59266	-1.84505	3.59266	down	-1205.3	-10.2352	1205.3	down
C25 H36 N9 nullnullnull 7.1580043	205.677	346.011	200.68	28.6625	7.17345	79.2241	2726.63	0.109728	0.026143	0.1156	0.728999	0.691334	0.189392	3.77925e-11	1	1	1	1	1	1	4.86011e-08	1232.29	10.2671	1232.29	up	1.32557	0.406608	1.32557	up	63.4525	5.98761	63.4525	up	-106.46	-6.73417	106.46	down	53.7392	5.7479	53.7392	up	-5192.63	-12.3422	5192.63	down	69.5356	6.11968	69.5356	up
C25 H36 N9 nullnullnull 7.2849917	47.3198	1109.95	334.68	144.777	7.08231	7.4661	3216.2	0.553824	7.27609e-06	0.0185479	0.168878	0.674061	0.665878	1.87166e-13	1	0.00935704	1	1	1	1	2.40696e-10	268.905	8.07095	268.905	up	-4.61326	-2.20579	4.61326	down	9.3619	3.2268	9.3619	up	-3102.86	-11.5994	3102.86	down	-1.45254	-0.538576	1.45254	down	-32635.2	-14.9941	32635.2	down	11.0164	3.46158	11.0164	up
C25 H36 N9 nullnullnull 7.434998	988.614	32.798	13.311	901.817	3.08987	13.1644	3713.96	1.16218e-06	0.57939	0.800525	3.20607e-06	0.748463	0.508531	1.93198e-17	0.00149457	1	1	0.00412301	1	1	2.48453e-14	296118	18.1758	296118	up	1.7694	0.823261	1.7694	up	184807	17.4957	184807	up	27203.6	14.7315	27203.6	up	980558	19.9032	980558	up	3.67799	1.87892	3.67799	up	224741	17.7779	224741	up
C25 H37 N S	64.3264	377.979	144.673	228.44	92.9799	3.20934	1288.09	0.506045	0.0216763	0.219936	0.0941003	0.162843	0.794119	1.45406e-06	1	1	1	1	1	1	0.00186992	1181.75	10.2067	1181.75	up	1.63065	0.705449	1.63065	up	194.877	7.60642	194.877	up	117.904	6.88147	117.904	up	192.713	7.59031	192.713	up	-153.231	-7.25956	153.231	down	72.2869	6.17566	72.2869	up
C25 H42 N25	52.3057	768.713	489.322	73.8465	312.573	5.18411	1252.23	0.502636	0.000123528	0.00253203	0.380049	0.00520308	0.711704	1.81768e-07	1	0.158858	1	1	1	1	0.000233754	3.50073	1.80766	3.50073	up	5.64651	2.49736	5.64651	up	-6.72573	-2.74969	6.72573	down	1735.18	10.7609	1735.18	up	107.93	6.75395	107.93	up	24620.7	14.5876	24620.7	up	-6.50751	-2.7021	6.50751	down
C25 H42 N25 nullnullnull 7.3679953	262.049	104.819	164.766	273.498	227.634	61.4704	2464.41	0.0130494	0.165637	0.0615593	0.0109184	0.00602078	0.145796	4.91287e-14	1	1	1	1	1	1	6.31795e-11	4.24885	2.08707	4.24885	up	20198.1	14.3019	20198.1	up	-1.02595	-0.0369587	1.02595	down	23102.5	14.4958	23102.5	up	1.61761	0.693864	1.61761	up	4704.64	12.1999	4704.64	up	-1.28506	-0.361839	1.28506	down
C25 H43 N8 O4	761.45	409.624	289.989	536.003	20.0137	4.92751	1303.51	0.000245327	0.00904622	0.0336174	0.00237524	0.485819	0.72914	2.871e-07	0.315491	1	1	1	1	1	0.000369211	-18295	-14.1592	18295	down	-2.06787	-1.04815	2.06787	down	-472.553	-8.88433	472.553	down	-1.37255	-0.456855	1.37255	down	2.19753	1.13588	2.19753	up	4.42791	2.14663	4.42791	up	-281245	-18.1015	281245	down
C25 H43 N8 O4 null 4.5020065	307.817	307.644	685.936	102.621	387.908	206.969	3587.24	0.0076289	0.00764848	4.1436e-05	0.182881	0.000529862	0.00990112	3.36052e-17	1	1	0.0532867	1	0.681403	1	4.32163e-14	16.5838	4.0517	16.5838	up	14438	13.8176	14438	up	-1.41975	-0.505641	1.41975	down	786820	19.5857	786820	up	-1.68137	-0.74964	1.68137	down	464286	18.8247	464286	up	-1.37369	-0.458056	1.37369	down
C25 H47 N6 O7 null 1.5210004	106.645	111.986	277.387	77.4292	97.375	87.8721	2065.47	0.296114	0.278898	0.0457418	0.411634	0.137076	0.157538	1.4432e-09	1	1	1	1	1	1	1.85596e-06	10144.1	13.3084	10144.1	up	1.7694	0.823261	1.7694	up	4581.77	12.1617	4581.77	up	1.6457	0.718699	1.6457	up	3.88193	1.95678	3.88193	up	3.67799	1.87892	3.67799	up	6247.88	12.6091	6247.88	up
C25 H47 N6 O7 null 1.524001	116.399	173.339	378.504	113.926	151.283	137.304	2677.03	0.233682	0.117136	0.0107833	0.240868	0.0534	0.0654139	4.57945e-12	1	1	1	1	1	1	5.88918e-09	55223.6	15.753	55223.6	up	1.7694	0.823261	1.7694	up	5202.33	12.3449	5202.33	up	1.6457	0.718699	1.6457	up	3.88193	1.95678	3.88193	up	3.67799	1.87892	3.67799	up	43333	15.4032	43333	up
C25 H48 N5 S2	219.392	124.953	15.8471	506.476	198.589	77.1447	808.61	0.0790862	0.230708	0.827541	0.00365612	0.0324067	0.178224	3.61478e-05	1	1	1	1	1	1	0.0464861	-186.295	-7.54144	186.295	down	-22.3346	-4.48121	22.3346	down	-4386.3	-12.0988	4386.3	down	-19.5797	-4.29129	19.5797	down	-5194.56	-12.3428	5194.56	down	2.94442	1.55799	2.94442	up	-4243.98	-12.0512	4243.98	down
C25 H50 N5 O10	60.0818	82.1796	15.8405	126.69	219.301	90.2475	2080.26	0.247352	0.149932	0.688305	0.0558222	0.0018902	0.0421525	3.4309e-15	1	1	1	1	1	1	4.41214e-12	-183.221	-7.51744	183.221	down	4.86595	2.28272	4.86595	up	-4313.94	-12.0748	4313.94	down	-1.17405	-0.231495	1.17405	down	-5108.87	-12.3188	5108.87	down	6.55196	2.71193	6.55196	up	-4173.96	-12.0272	4173.96	down
C26 H35 N5 O	405.846	4.13382	99.5784	554.408	159.474	201.661	781.634	0.00430442	0.941954	0.243187	0.000706463	0.034961	0.018174	9.63521e-06	1	1	1	0.908512	1	1	0.0123909	-12.1712	-3.6054	12.1712	down	-1.33388	-0.415625	1.33388	down	-26.9939	-4.75456	26.9939	down	5.01205	2.3254	5.01205	up	9.16123	3.19554	9.16123	up	4.23026	2.08074	4.23026	up	-5401.71	-12.3992	5401.71	down
C26 H37 N12 O4	40.8713	57.1902	57.7317	105.817	10.2665	0.561836	7849.01	0.379169	0.259268	0.256035	0.0854643	0.484505	0.86989	1.44103e-30	1	1	1	1	1	1	1.85317e-27	10138160	23.2733	10138160	up	-2.42862	-1.28013	2.42862	down	417545	18.6716	417545	up	-2.61117	-1.3847	2.61117	down	25217.9	14.6222	25217.9	up	-1.16835	-0.224478	1.16835	down	894490	19.7707	894490	up
C26 H38 N5 O4	404.468	8.14999	5.98339	254.178	112.318	142.406	4012.84	0.000348854	0.836265	0.876902	0.00550871	0.0293305	0.0145594	3.62169e-21	0.448627	1	1	1	1	1	4.65749e-18	-54399.7	-15.7313	54399.7	down	-1.94121	-0.956958	1.94121	down	-43425.4	-15.4063	43425.4	down	-3.03685	-1.60257	3.03685	down	-60.9573	-5.92973	60.9573	down	-1.22543	-0.29329	1.22543	down	-1.23928e+06	-20.2411	1.23928e+06	down
C26 H38 N5 O4 nullnullnull 1.192001	57.6657	179.045	17.5814	14.9403	135.745	21.2091	6171.64	0.254076	0.0166352	0.654944	0.697716	0.0124111	0.314211	1.61368e-27	1	1	1	1	1	1	2.07519e-24	-7845.15	-12.9376	7845.15	down	3.5809	1.84032	3.5809	up	-184714	-17.4949	184714	down	2.29284	1.19714	2.29284	up	-1402.47	-10.4538	1402.47	down	39.1552	5.29113	39.1552	up	-178721	-17.4473	178721	down
C26 H40 N3 O2	355.062	878.732	583.41	472.104	5.38595	80.6689	6225.77	0.0032654	2.74722e-06	0.000125665	0.000592995	0.665844	0.0975945	1.39539e-23	1	0.00353292	0.161605	0.762592	1	1	1.79447e-20	130.061	7.02304	130.061	up	-377.587	-8.56067	377.587	down	6.41106	2.68056	6.41106	up	-755116	-19.5263	755116	down	5.0234	2.32866	5.0234	up	-337872	-18.3661	337872	down	5.79428	2.53463	5.79428	up
C26 H40 N3 O2 nullnullnull 7.4470067	364.719	75.9748	28.2871	237.138	0.851051	90.8563	4447.05	0.0144506	0.396893	0.706948	0.0601959	0.885268	0.138931	3.51392e-16	1	1	1	1	1	1	4.5189e-13	7748669	22.8855	7748669	up	1.96034	0.971104	1.96034	up	170186	17.3767	170186	up	51.7603	5.69377	51.7603	up	124861	16.93	124861	up	-1.14384	-0.193884	1.14384	down	209645	17.6776	209645	up
C26 H40 N9	336.069	205.528	486.39	260.544	78.4259	49.9709	908.168	0.0190704	0.0844029	0.00369567	0.0447599	0.166602	0.268403	9.74392e-06	1	1	1	1	1	1	0.0125307	-122.079	-6.93167	122.079	down	-1613.17	-10.6557	1613.17	down	-2874.34	-11.489	2874.34	down	-80.6532	-6.33366	80.6532	down	-3403.99	-11.733	3403.99	down	4.55057	2.18605	4.55057	up	-529.754	-9.04918	529.754	down
C26 H43 N15 O S	9.95581	431.088	334.693	500.284	337.847	23.6608	1430.88	0.905236	0.0169066	0.0404985	0.00914564	0.01124	0.493395	9.56752e-07	1	1	1	1	1	1	0.00123038	-2.04224	-1.03015	2.04224	down	-1285.27	-10.3278	1285.27	down	-14.7798	-3.88555	14.7798	down	-45728.9	-15.4808	45728.9	down	-82.4158	-6.36485	82.4158	down	-15095.8	-13.8819	15095.8	down	1.50995	0.594499	1.50995	up
C26 H43 N7 O	126.005	171.081	381.113	205.944	34.0287	14.2628	5980.34	0.20099	0.11512	0.00954449	0.0752426	0.349682	0.544168	8.86416e-20	1	1	1	1	1	1	1.13993e-16	940.851	9.87782	940.851	up	-5363.94	-12.3891	5363.94	down	30.6214	4.93647	30.6214	up	-185.983	-7.53903	185.983	down	238.919	7.90038	238.919	up	-2580.48	-11.3334	2580.48	down	271.011	8.08221	271.011	up
C26 H45 O11	342.908	18.9094	99.5937	541.754	10.136	60.124	2776.79	0.0026013	0.701349	0.160279	0.000122792	0.53837	0.136478	9.50133e-16	1	1	1	0.157911	1	1	1.22187e-12	-8553.36	-13.0623	8553.36	down	-1.45261	-0.538652	1.45261	down	-201388	-17.6196	201388	down	-1.23043	-0.299168	1.23043	down	-8.07663	-3.01375	8.07663	down	-7.73031	-2.95053	7.73031	down	-28031.2	-14.7747	28031.2	down
C26 H46 O4 S	722.171	330.351	273.071	936.426	1.48144	9.11212	2179.67	8.79267e-06	0.00306303	0.0078423	5.11909e-07	0.813176	0.558182	1.22016e-13	0.0113074	1	1	0.000658316	1	1	1.56913e-10	2.36258e+06	21.1719	2.36258e+06	up	7.99374	2.99887	7.99374	up	360215	18.4585	360215	up	180437	17.4611	180437	up	1.89224e+06	20.8517	1.89224e+06	up	1994.68	10.9619	1994.68	up	1678283	20.6786	1678283	up
C26 H49 N2 O3 S	5.26818	11.8507	32.7812	42.4475	41.6939	17.9444	3490.99	0.873123	0.73749	0.433364	0.33989	0.146717	0.339078	2.12936e-21	1	1	1	1	1	1	2.73836e-18	-368.247	-8.52453	368.247	down	4.30947	2.10751	4.30947	up	-1450.71	-10.5025	1450.71	down	8.838	3.14372	8.838	up	-841.337	-9.71654	841.337	down	5.67848	2.50551	5.67848	up	-8389.04	-13.0343	8389.04	down
C26 H49 O14	158.363	227.862	490.066	11.781	112.06	27.8454	1143.48	0.0603336	0.0187783	0.000312679	0.805345	0.0457527	0.314351	8.96824e-09	1	1	0.402106	1	1	1	1.15331e-05	27.5151	4.78215	27.5151	up	289.722	8.17853	289.722	up	1.16862	0.224806	1.16862	up	405.095	8.66212	405.095	up	-1.01339	-0.0191936	1.01339	down	18332.1	14.1621	18332.1	up	1.20781	0.272391	1.20781	up
C26 H50 N15 O3	56.4085	70.2158	138.791	25.8889	16.2162	87.1588	1364.36	0.532899	0.457559	0.216623	0.748096	0.5476	0.165541	4.50555e-07	1	1	1	1	1	1	0.000579414	-105.087	-6.71544	105.087	down	-16.8018	-4.07054	16.8018	down	-2474.27	-11.2728	2474.27	down	-1.07747	-0.107642	1.07747	down	-2930.21	-11.5168	2930.21	down	-124.397	-6.95881	124.397	down	-2393.99	-11.2252	2393.99	down
C26 H55 N5	181.098	392.515	31.0877	125.723	13.1569	84.7136	3408.66	0.176045	0.0255917	0.737773	0.296828	0.61269	0.201087	6.36525e-12	1	1	1	1	1	1	8.18571e-09	648044	19.3057	648044	up	1.7694	0.823261	1.7694	up	17697.4	14.1112	17697.4	up	1.6457	0.718699	1.6457	up	32358	14.9818	32358	up	3.67799	1.87892	3.67799	up	28413.4	14.7943	28413.4	up
C26 H55 N5 nullnullnull 0.13899995	110.919	310.275	170.791	121.177	16.9338	292.331	4702.56	0.174007	0.00913878	0.0700283	0.148642	0.461948	0.00298096	1.64508e-19	1	1	1	1	1	1	2.11557e-16	9459598	23.1733	9459598	up	1.7694	0.823261	1.7694	up	436984	18.7372	436984	up	1.6457	0.718699	1.6457	up	376813	18.5235	376813	up	3.67799	1.87892	3.67799	up	5576.25	12.4451	5576.25	up
C26 H55 N5 nullnullnull 0.2590003	127.128	321.927	322.416	397.225	20.7168	217.454	5332.69	0.0401284	0.00047535	0.000470396	9.79255e-05	0.298686	0.00112637	8.79799e-27	1	0.6113	0.604929	0.125932	1	1	1.13142e-23	15319420	23.8689	15319420	up	1.7694	0.823261	1.7694	up	521532	18.9924	521532	up	1.6457	0.718699	1.6457	up	513300	18.9694	513300	up	3.67799	1.87892	3.67799	up	256898	17.9708	256898	up
C27 H37 N13 O	279.407	136.592	476.553	774.246	0.539032	378.596	5218.31	0.018205	0.133538	0.00137475	3.81601e-05	0.898645	0.00113976	5.98629e-20	1	1	1	0.0490739	1	1	7.69837e-17	19482060	24.2156	19482060	up	1.7694	0.823261	1.7694	up	4.37877e+06	22.0621	4.37877e+06	up	9.02853	3.17449	9.02853	up	1.6115e+06	20.62	1.6115e+06	up	3.67799	1.87892	3.67799	up	7.13707e+06	22.7669	7.13707e+06	up
C27 H37 N13 O nullnullnull 4.5440044	205.006	628.809	312.377	126.814	50.4399	140.617	1897.79	0.0579223	0.000299083	0.0141736	0.167261	0.231159	0.0474767	1.82535e-10	1	0.384621	1	1	1	1	2.34741e-07	515.78	9.01061	515.78	up	1.68192	0.750108	1.68192	up	19.6774	4.29847	19.6774	up	-18.7458	-4.22849	18.7458	down	20.5747	4.3628	20.5747	up	-54411.3	-15.7316	54411.3	down	34.1778	5.09499	34.1778	up
C27 H39 N S nullnullnull 5.002007	181.037	103.737	47.5775	122.059	148.544	2.42713	1443.17	0.107962	0.274701	0.549759	0.219676	0.0561473	0.804768	5.69033e-08	1	1	1	1	1	1	7.31776e-05	-1528.69	-10.5781	1528.69	down	-2.26839	-1.18167	2.26839	down	-192.14	-7.58601	192.14	down	-1.30629	-0.385478	1.30629	down	-153.248	-7.25973	153.248	down	1.30801	0.387371	1.30801	up	-29570.5	-14.8519	29570.5	down
C27 H39 N S nullnullnull 7.4180117	90.7559	571.119	40.6628	925.065	11.4616	29.4658	2174.99	0.405983	0.00482518	0.665882	0.000251859	0.632573	0.443887	5.36894e-09	1	1	1	0.32389	1	1	6.90445e-06	186753	17.5108	186753	up	7.08005	2.82376	7.08005	up	130.092	7.02338	130.092	up	190.764	7.57565	190.764	up	609650	19.2176	609650	up	60.931	5.9291	60.931	up	18607.2	14.1836	18607.2	up
C27 H42 N4 S nullnullnull 7.411007	243.879	635.307	999.383	651.038	77.3864	4.24971	714.669	0.00882034	1.31875e-05	7.57311e-08	1.03873e-05	0.0775385	0.67604	6.75144e-07	1	0.0169592	9.73901e-05	0.0133581	1	1	0.000868235	12289106	23.5509	12289106	up	200.532	7.64769	200.532	up	349044	18.413	349044	up	952366	19.8612	952366	up	2.53741e+06	21.2749	2.53741e+06	up	650655	19.3115	650655	up	437376	18.7385	437376	up
C27 H44 N22 O	314.056	84.624	118.243	240.407	167.326	58.1632	2334.49	0.00501458	0.222207	0.124318	0.0162323	0.0160848	0.150545	7.70985e-14	1	1	1	1	1	1	9.91486e-11	-694.408	-9.43964	694.408	down	4.95127	2.3078	4.95127	up	-16349.8	-13.997	16349.8	down	-6.80956	-2.76756	6.80956	down	-19362.6	-14.241	19362.6	down	1.00757	0.0108812	1.00757	up	-15819.3	-13.9494	15819.3	down
C27 H44 N25	144.631	151.071	133.202	3.44839	21.4801	23.4484	2590.41	0.122587	0.111956	0.144079	0.949828	0.425686	0.405337	4.47289e-13	1	1	1	1	1	1	5.75214e-10	-34.324	-5.10115	34.324	down	4.65313	2.2182	4.65313	up	-3029.29	-11.5648	3029.29	down	-5.56964	-2.47758	5.56964	down	-390.75	-8.6101	390.75	down	49.5554	5.63097	49.5554	up	-2931	-11.5172	2931	down
C27 H47 N16	315.074	409.686	228.893	248.498	236.547	235.356	4824.77	0.00506711	0.00119057	0.0199656	0.0145488	0.00462467	0.00472334	5.1255e-21	1	1	1	1	1	1	6.59139e-18	46195.5	15.4955	46195.5	up	-13.8261	-3.78933	13.8261	down	27124.5	14.7273	27124.5	up	-14.8654	-3.89389	14.8654	down	56810.9	15.7939	56810.9	up	-6.65145	-2.73367	6.65145	down	11170.3	13.4474	11170.3	up
C27 H47 N2 O6	198.672	907.417	1631.18	228.47	196.346	75.7488	2802.44	0.169245	0.000558471	3.62598e-06	0.13061	0.0618035	0.242552	5.11717e-10	1	0.718194	0.00466301	1	1	1	6.58068e-07	-5.38471	-2.42887	5.38471	down	-5.85116	-2.54872	5.85116	down	-126.783	-6.98621	126.783	down	534.903	9.06313	534.903	up	-150.145	-7.23021	150.145	down	238090	17.8611	238090	up	-122.669	-6.93863	122.669	down
C27 H47 N2 O6 null 4.513	210.787	279.006	621.558	30.1775	430.398	238.304	3672.27	0.0850341	0.0396367	0.00107376	0.695424	0.00187479	0.0188932	2.9758e-14	1	1	1	1	1	1	3.82688e-11	2.9152	1.54359	2.9152	up	6297.39	12.6205	6297.39	up	-8.07663	-3.01375	8.07663	down	17462	14.0919	17462	up	-9.56492	-3.25775	9.56492	down	585748	19.1599	585748	up	-7.81457	-2.96617	7.81457	down
C27 H47 N5 O5	291.11	241.028	117.278	621.222	142.173	36.2087	2337.01	0.178509	0.238733	0.494606	0.0277794	0.193363	0.509727	1.08045e-06	1	1	1	1	1	1	0.00138946	-2014.25	-10.976	2014.25	down	9.37089	3.22819	9.37089	up	-653.455	-9.35194	653.455	down	9.07627	3.1821	9.07627	up	-2389.78	-11.2227	2389.78	down	-888.044	-9.79449	888.044	down	-45886.6	-15.4858	45886.6	down
C27 H49 N5 O5	638.17	50.2865	1.10073	399.034	107.283	10.8398	4261.86	0.00141241	0.569977	0.987678	0.0144167	0.124332	0.622648	6.00227e-15	1	1	1	1	1	1	7.71891e-12	-124690	-16.928	124690	down	1.94708	0.96131	1.94708	up	-46168.9	-15.4946	46168.9	down	1.55355	0.635567	1.55355	up	-13.0615	-3.70724	13.0615	down	11.523	3.52644	11.523	up	-323168	-18.3019	323168	down
C27 H49 N5 O5 nullnullnull 4.5989995	439.328	153.438	205.393	505.605	11.1097	4.97107	1923.25	0.0103177	0.189496	0.109716	0.00542502	0.62108	0.740784	7.59512e-09	1	1	1	1	1	1	9.76732e-06	-4099.12	-12.0011	4099.12	down	1.47429	0.560016	1.47429	up	-60901.4	-15.8942	60901.4	down	1.1747	0.232296	1.1747	up	1.38304	0.467844	1.38304	up	-1.43311	-0.519145	1.43311	down	-48129.8	-15.5546	48129.8	down
C27 H51 N2 O13	6.57607	243.94	268.383	73.5105	9.09684	4.01208	2408.28	0.919397	0.0500526	0.0375666	0.395116	0.630922	0.749575	2.69352e-11	1	1	1	1	1	1	3.46387e-08	468.565	8.87211	468.565	up	2.18665	1.12872	2.18665	up	212.316	7.73007	212.316	up	-7.39804	-2.88714	7.39804	down	264.836	8.04895	264.836	up	-191.483	-7.58107	191.483	down	453.73	8.82569	453.73	up
C27 H56 N11 O8 S	491.652	0.836238	130.868	613.844	38.7382	0.837305	629.552	0.000891297	0.986917	0.134636	0.000188385	0.272926	0.871433	2.98575e-05	1	1	1	0.242263	1	1	0.0383967	-103.645	-6.6955	103.645	down	-74.8136	-6.22523	74.8136	down	-2440.31	-11.2529	2440.31	down	-426.411	-8.7361	426.411	down	-2889.99	-11.4969	2889.99	down	7.07348	2.82242	7.07348	up	-2361.14	-11.2053	2361.14	down
C27 H56 N4	1129.85	629.627	227.589	287.751	11.5844	394.894	4313.48	7.15681e-06	0.000851287	0.0661562	0.0333368	0.593773	0.00252923	6.07267e-16	0.00920366	1	1	1	1	1	7.80945e-13	15446732	23.8808	15446732	up	1.7694	0.823261	1.7694	up	3.92708e+06	21.905	3.92708e+06	up	7.73578	2.95155	7.73578	up	114000	16.7987	114000	up	3.67799	1.87892	3.67799	up	114826	16.8091	114826	up
C28 H29 N26 O	244.597	15.1356	61.4253	215.387	4.65717	0.41049	822.192	0.0134619	0.754387	0.322848	0.0219413	0.677701	0.901748	4.46065e-07	1	1	1	1	1	1	0.00057364	10421.2	13.3472	10421.2	up	1.7694	0.823261	1.7694	up	16.6212	4.05495	16.6212	up	1.6457	0.718699	1.6457	up	25.5296	4.6741	25.5296	up	3.67799	1.87892	3.67799	up	1105.84	10.1109	1105.84	up
C28 H33 N nullnullnull 4.364006	1.01835	7.95928	41.3015	57.2902	27.4513	30.4169	1350.78	0.990189	0.925899	0.671826	0.576616	0.468254	0.445256	2.44499e-06	1	1	1	1	1	1	0.00314425	-151.841	-7.24642	151.841	down	-1.19025	-0.25127	1.19025	down	-106.184	-6.73043	106.184	down	-1.26738	-0.341846	1.26738	down	-225.175	-7.8149	225.175	down	-1.32927	-0.410637	1.32927	down	-2638.65	-11.3656	2638.65	down
C28 H37 N2 O2	43.2183	203.413	33.9485	242.025	97.6616	253.108	5510.35	0.460233	0.0297007	0.54283	0.0158042	0.063719	0.00337153	1.33451e-22	1	1	1	1	1	1	1.71618e-19	5240.39	12.3555	5240.39	up	-2493.91	-11.2842	2493.91	down	139.482	7.12394	139.482	up	-2681.38	-11.3888	2681.38	down	194.79	7.60578	194.79	up	-1199.77	-10.2285	1199.77	down	171.74	7.42408	171.74	up
C28 H37 N4	57.7594	6.19944	14.5338	51.3059	346.268	458.261	1067.29	0.347303	0.891376	0.764137	0.390274	0.000601969	9.6621e-05	2.03143e-08	1	1	1	1	0.774132	0.124255	2.61242e-05	108.242	6.75812	108.242	up	1.7694	0.823261	1.7694	up	4.59726	2.20078	4.59726	up	1.6457	0.718699	1.6457	up	3.88193	1.95678	3.88193	up	3.67799	1.87892	3.67799	up	17326.2	14.0807	17326.2	up
C28 H52 N12 O4	653.894	270.625	62.6919	377.894	21.3599	0.215625	1670.72	3.66475e-05	0.0102703	0.328609	0.00193929	0.383087	0.929986	3.9604e-11	0.0471287	1	1	1	1	1	5.09308e-08	126124	16.9445	126124	up	2360.31	11.2048	2360.31	up	7440.6	12.8612	7440.6	up	377.482	8.56026	377.482	up	4050.61	11.9839	4050.61	up	-29.189	-4.86735	29.189	down	8555.86	13.0627	8555.86	up
C28 H56 N3	213.328	629.801	278.586	1268.27	2.73531	514.158	882.187	0.0284134	6.45898e-05	0.0102113	2.87306e-08	0.757666	6.31658e-05	4.15506e-07	1	0.0830625	1	3.69476e-05	1	0.0812312	0.000534341	6896.56	12.7517	6896.56	up	1.7694	0.823261	1.7694	up	142.686	7.1567	142.686	up	1.6457	0.718699	1.6457	up	338290	18.3679	338290	up	3.67799	1.87892	3.67799	up	25.3848	4.6659	25.3848	up
C28 H57 N2 O	15.3489	157.206	106.244	58.5581	1.66471	5.33992	4646.04	0.834031	0.162444	0.28993	0.502784	0.843083	0.723018	3.12545e-16	1	1	1	1	1	1	4.01933e-13	2808001	21.4211	2808001	up	1.7694	0.823261	1.7694	up	19355.8	14.2405	19355.8	up	1.6457	0.718699	1.6457	up	25836.3	14.6571	25836.3	up	3.67799	1.87892	3.67799	up	29002.2	14.8239	29002.2	up
C28 H63 N14 null 5.4149985	38.3784	12.0005	192.438	139.035	690.907	439.999	619.815	0.531077	0.819495	0.0465018	0.106212	8.38194e-06	0.000272438	2.16383e-05	1	1	1	1	0.0107792	0.350356	0.0278268	4.64809	2.21664	4.64809	up	40.3829	5.33567	40.3829	up	-5.06551	-2.34071	5.06551	down	635.777	9.31238	635.777	up	-5.99894	-2.58471	5.99894	down	9216.47	13.17	9216.47	up	-4.90116	-2.29312	4.90116	down
C29 H33 N15 O2	79.816	25.0955	32.9452	54.8275	6.15784	0.389523	5893.7	0.156176	0.55209	0.459374	0.276497	0.589374	0.891918	9.46934e-27	1	1	1	1	1	1	1.21776e-23	673010	19.3603	673010	up	1.7694	0.823261	1.7694	up	645296	19.2996	645296	up	6.59042	2.72037	6.59042	up	315407	18.2669	315407	up	3.67799	1.87892	3.67799	up	886172	19.7572	886172	up
C29 H41 N3 O3	74.4279	296.605	1.15815	324.589	412.088	6.64236	1626.87	0.43231	0.0394333	0.986889	0.029484	0.00305043	0.698317	4.81288e-08	1	1	1	1	1	1	6.18936e-05	-1.23345	-0.302694	1.23345	down	4021.47	11.9735	4021.47	up	-29.0414	-4.86004	29.0414	down	168.605	7.3975	168.605	up	50.5259	5.65895	50.5259	up	821.382	9.68191	821.382	up	-28.0991	-4.81245	28.0991	down
C29 H41 N8 O4	89.297	247.448	49.9243	6.04523	96.4246	221.345	1298.84	0.272924	0.0304763	0.481096	0.914495	0.095362	0.0125369	3.03064e-08	1	1	1	1	1	1	3.8974e-05	272.583	8.09055	272.583	up	-2.69768	-1.43172	2.69768	down	11.2786	3.49551	11.2786	up	-284.692	-8.15326	284.692	down	9.85222	3.30045	9.85222	up	-681.497	-9.41256	681.497	down	18.2911	4.19307	18.2911	up
C29 H47 N O11	204.689	223.27	523.789	61.9519	6.01833	317.568	1479.44	0.0879339	0.0710725	0.00267156	0.470922	0.701733	0.00666449	6.20579e-08	1	1	1	1	1	1	7.98065e-05	22.3802	4.48415	22.3802	up	-1.77313	-0.826301	1.77313	down	38.6959	5.27411	38.6959	up	-2157.2	-11.0749	2157.2	down	58.945	5.8813	58.945	up	-965.227	-9.91472	965.227	down	15.7725	3.97934	15.7725	up
C29 H47 N3 S null 4.8449984	178.147	352.417	20.0264	28.1758	12.9116	9.13224	2531	0.173408	0.0337637	0.817739	0.75369	0.611542	0.669208	5.69097e-10	1	1	1	1	1	1	7.31858e-07	-549.949	-9.10315	549.949	down	3.56726	1.83482	3.56726	up	-12948.5	-13.6605	12948.5	down	-1.77465	-0.827538	1.77465	down	-8.22008	-3.03915	8.22008	down	25.2514	4.65829	25.2514	up	-369.193	-8.52823	369.193	down
C29 H47 N3 S nullnullnull 7.206989	330.924	1.53468	158.556	462.084	17.2756	198.288	2591.15	0.051418	0.985767	0.234081	0.0169017	0.57167	0.0581423	1.24499e-09	1	1	1	1	1	1	1.60105e-06	3900.95	11.9296	3900.95	up	-4370.46	-12.0936	4370.46	down	120.384	6.9115	120.384	up	-132.779	-7.05288	132.779	down	130.79	7.03111	130.79	up	3.41745	1.77292	3.41745	up	23.939	4.58129	23.939	up
C29 H49 N4 O10	286.613	54.5428	221.096	62.7404	313.537	153.711	2333.46	0.000478748	0.205271	0.00239899	0.162743	4.96326e-05	0.00348066	1.57653e-18	0.61567	1	1	1	0.0638276	1	2.02742e-15	6.36571	2.67032	6.36571	up	12301	13.5865	12301	up	-3.69872	-1.88702	3.69872	down	7770.91	12.9239	7770.91	up	-4.38028	-2.13102	4.38028	down	5950.72	12.5388	5950.72	up	-3.57871	-1.83944	3.57871	down
C29 H57 N18	99.2799	223.107	646.273	147.513	0.83451	19.3199	1419.92	0.199556	0.0293951	8.24068e-05	0.0935102	0.868274	0.425834	1.84906e-09	1	1	0.105975	1	1	1	2.37789e-06	-71.2123	-6.15405	71.2123	down	-267.342	-8.06254	267.342	down	-1676.69	-10.7114	1676.69	down	1.02021	0.0288591	1.02021	up	-1985.66	-10.9554	1985.66	down	5.14826	2.36408	5.14826	up	-1622.29	-10.6638	1622.29	down
C29 H58 N16	144.337	147.029	755.465	37.2243	150.656	179.452	1318.25	0.103875	0.0997084	2.62837e-05	0.550126	0.0303547	0.018461	7.56662e-09	1	1	0.0338008	1	1	1	9.73068e-06	5.32009	2.41145	5.32009	up	107.706	6.75095	107.706	up	-4.42566	-2.14589	4.42566	down	1646.63	10.6853	1646.63	up	-5.24119	-2.38989	5.24119	down	11714.1	13.516	11714.1	up	-4.28207	-2.09831	4.28207	down
C3 H4 O5 S3	184.831	284.395	251.216	332.903	63.3642	106.979	5538.85	0.00119854	5.04594e-05	0.00014069	1.18474e-05	0.0274346	0.00459861	1.02295e-32	1	0.0648908	0.180927	0.0152357	1	1	1.31552e-29	7849322	22.9041	7849322	up	1.7694	0.823261	1.7694	up	475861	18.8602	475861	up	1.6457	0.718699	1.6457	up	274526	18.0666	274526	up	3.67799	1.87892	3.67799	up	1.73821e+06	20.7292	1.73821e+06	up
C3 H7 N O	105.431	16.6142	42.7606	161.733	66.7864	2.13981	1472.01	0.170511	0.752382	0.482963	0.0685884	0.133999	0.786969	6.39392e-10	1	1	1	1	1	1	8.22258e-07	-105.94	-6.7271	105.94	down	-2.48717	-1.3145	2.48717	down	-118.657	-6.89065	118.657	down	9.27865	3.21391	9.27865	up	-356.537	-8.47791	356.537	down	5.69814	2.51049	5.69814	up	-503.015	-8.97446	503.015	down
C3 H7 N O2	3.09144	18.3489	336.01	162.811	28.1766	21.2135	2389.62	0.966363	0.816592	0.0289259	0.172094	0.432121	0.49525	3.21392e-10	1	1	1	1	1	1	4.1331e-07	-7.81054	-2.96542	7.81054	down	1.39171	0.476854	1.39171	up	-112.061	-6.80815	112.061	down	57.8972	5.85542	57.8972	up	-419.002	-8.71081	419.002	down	25.0934	4.64924	25.0934	up	-676.12	-9.40114	676.12	down
C30 H35 N	80.2298	11.0796	3.2185	50.637	11.435	0.294722	1488.12	0.383723	0.874782	0.961835	0.544736	0.6005	0.932937	6.96832e-08	1	1	1	1	1	1	8.96126e-05	-36.682	-5.197	36.682	down	4.07629	2.02726	4.07629	up	-509.141	-8.99192	509.141	down	3.74882	1.90644	3.74882	up	-147.912	-7.2086	147.912	down	-1.01465	-0.0209847	1.01465	down	-98.6195	-6.6238	98.6195	down
C30 H36 N13 O4	13.2718	412.179	463.95	154.922	3.49151	155.731	989.735	0.819127	0.00322216	0.00166393	0.10397	0.74653	0.0335138	6.19189e-07	1	1	1	1	1	1	0.000796277	-1337.72	-10.3856	1337.72	down	-4.55776	-2.18833	4.55776	down	-6955.47	-12.7639	6955.47	down	-4.70726	-2.23489	4.70726	down	-575.932	-9.16976	575.932	down	-39368.6	-15.2648	39368.6	down	-30474.5	-14.8953	30474.5	down
C30 H46 N16 O2	94.9507	40.7943	165.246	141.735	110.158	67.2825	2419.51	0.22553	0.523448	0.0777687	0.110653	0.0643663	0.146467	4.38577e-13	1	1	1	1	1	1	5.6401e-10	-67.719	-6.08149	67.719	down	8.3416	3.06033	8.3416	up	-6706.58	-12.7114	6706.58	down	7.61369	2.9286	7.61369	up	-12.3467	-3.62605	12.3467	down	-2.1927	-1.13271	2.1927	down	-1153.78	-10.1722	1153.78	down
C30 H50 N16 O	170.878	116.721	281.522	456.418	71.7092	43.9716	835.967	0.111732	0.220648	0.0289077	0.00375912	0.172756	0.284498	1.19073e-05	1	1	1	1	1	1	0.0153128	-4.13741	-2.04873	4.13741	down	100.118	6.64556	100.118	up	-97.4151	-6.60607	97.4151	down	69.5893	6.12079	69.5893	up	-1.26128	-0.334888	1.26128	down	-121.763	-6.92793	121.763	down	-94.2545	-6.55849	94.2545	down
C30 H56 N5 O5 S	762.918	33.3704	334.74	638.397	140.99	0.184206	2889.62	7.90057e-05	0.625915	0.0117032	0.000315399	0.0496457	0.942677	1.58736e-13	0.101601	1	1	0.405603	1	1	2.04134e-10	189665	17.5331	189665	up	-1.91206	-0.935125	1.91206	down	226710	17.7905	226710	up	-2.05578	-1.03969	2.05578	down	1.14742	0.198389	1.14742	up	4.02688	2.00966	4.02688	up	44378.9	15.4376	44378.9	up
C30 H58 O	294.198	680.274	73.6526	153.32	0.194166	288.557	4761.8	0.121192	0.00903448	0.582811	0.327909	0.957439	0.0425314	2.64625e-12	1	1	1	1	1	1	3.40307e-09	31020708	24.8867	31020708	up	1.7694	0.823261	1.7694	up	194256	17.5676	194256	up	1.6457	0.718699	1.6457	up	299577	18.1926	299577	up	3.67799	1.87892	3.67799	up	21036.9	14.3606	21036.9	up
C30 H60 N7 O3 S	784.549	85.5951	235.06	408.127	0.701561	37.7801	1588.95	0.000101661	0.325226	0.0495201	0.00628262	0.89161	0.318945	8.40258e-09	0.130736	1	1	1	1	1	1.08057e-05	-1.26297	-0.336823	1.26297	down	185.317	7.53385	185.317	up	-29.7366	-4.89417	29.7366	down	860.829	9.74958	860.829	up	-35.2162	-5.13817	35.2162	down	-37.169	-5.21603	37.169	down	-28.7718	-4.84658	28.7718	down
C30 H64 N O14 S	382.289	50.3255	308.802	229.542	98.4623	21.2877	1663.74	0.00264467	0.43226	0.0076985	0.0252699	0.0725395	0.399642	1.27421e-10	1	1	1	1	1	1	1.63863e-07	-16.7495	-4.06605	16.7495	down	7.14258	2.83644	7.14258	up	-394.367	-8.62339	394.367	down	1.57197	0.652574	1.57197	up	-467.037	-8.86739	467.037	down	35.9674	5.16862	35.9674	up	-381.571	-8.57581	381.571	down
C31 H42 N6 O10	22.1201	9.86733	70.5057	57.2953	9.89325	54.9157	4366.48	0.604371	0.798126	0.205681	0.27519	0.502775	0.116901	1.3028e-22	1	1	1	1	1	1	1.6754e-19	-1217.64	-10.2499	1217.64	down	1.03374	0.0478752	1.03374	up	-28669.2	-14.8072	28669.2	down	7.21326	2.85065	7.21326	up	-3018.31	-11.5595	3018.31	down	-1.38752	-0.472509	1.38752	down	-27739	-14.7596	27739	down
C31 H43 N O8	137.687	159.917	494.749	89.9901	254.698	113.429	1027	0.145659	0.107722	0.00151148	0.280673	0.0084881	0.0751385	6.98277e-07	1	1	1	1	1	1	0.000897985	4.03759	2.01349	4.03759	up	22.5147	4.4928	22.5147	up	-5.83143	-2.54385	5.83143	down	124.423	6.95911	124.423	up	-6.906	-2.78785	6.906	down	12799.3	13.6438	12799.3	up	-5.64223	-2.49627	5.64223	down
C31 H47 N2 O3	353.95	259.164	98.9802	693.152	114.241	0.482773	1388.28	0.0380605	0.0887824	0.389106	0.0021374	0.141667	0.923324	1.9006e-06	1	1	1	1	1	1	0.00244417	-11.7461	-3.55411	11.7461	down	20.4518	4.35415	20.4518	up	-44.5972	-5.47888	44.5972	down	218.301	7.77018	218.301	up	91.3981	6.51409	91.3981	up	825.843	9.68972	825.843	up	-267.589	-8.06387	267.589	down
C31 H48 N6 O3	661.077	503.561	268.488	467.48	73.9472	175.253	5428.5	5.33486e-06	6.81781e-05	0.00440026	0.000125418	0.0767712	0.00723189	1.33113e-24	0.00686063	0.087677	1	0.161287	1	1	1.71184e-21	2.43449e+06	21.2152	2.43449e+06	up	1.7694	0.823261	1.7694	up	1.87047e+06	20.835	1.87047e+06	up	10.1802	3.34769	10.1802	up	3.75551e+06	21.8406	3.75551e+06	up	3.67799	1.87892	3.67799	up	84415.2	16.3652	84415.2	up
C31 H48 N6 O3 nullnullnull 7.375	503.341	663.043	167.846	486.75	73.6636	143.8	5352.6	0.000554383	6.86055e-05	0.0689043	0.000693643	0.122888	0.0324229	3.3614e-21	0.712937	0.0882267	1	0.892025	1	1	4.32276e-18	8167321	22.9614	8167321	up	1.7694	0.823261	1.7694	up	396092	18.5955	396092	up	10.2992	3.36446	10.2992	up	2.37095e+06	21.177	2.37095e+06	up	3.67799	1.87892	3.67799	up	79944.3	16.2867	79944.3	up
C31 H48 N6 O3 nullnullnull 7.3779945	274.86	166.854	359.188	625.563	19.8977	430.418	1952.44	0.0992508	0.241785	0.050262	0.00634515	0.558612	0.00786975	1.4559e-07	1	1	1	1	1	1	0.000187228	73513.1	16.1657	73513.1	up	1.7694	0.823261	1.7694	up	55913	15.7709	55913	up	10.2003	3.35053	10.2003	up	164455	17.3273	164455	up	3.67799	1.87892	3.67799	up	214.109	7.7422	214.109	up
C31 H49 O S	3.74782	38.9577	41.5835	20.048	15.6465	109.808	4200.44	0.938664	0.520655	0.498456	0.713676	0.469364	0.0579034	8.5633e-19	1	1	1	1	1	1	1.10124e-15	-2978.11	-11.5402	2978.11	down	-6.94597	-2.79618	6.94597	down	-12780.8	-13.6417	12780.8	down	-1.94437	-0.959302	1.94437	down	-6768.14	-12.7245	6768.14	down	4.01554	2.00559	4.01554	up	-67844.3	-16.0499	67844.3	down
C31 H49 O S null 6.7000074	52.1129	104.81	75.3569	110.678	66.9317	8.24964	1830.71	0.459544	0.21283	0.326591	0.195541	0.159634	0.619415	1.64442e-10	1	1	1	1	1	1	2.11473e-07	-72.484	-6.17959	72.484	down	1.14405	0.194155	1.14405	up	-1706.63	-10.7369	1706.63	down	25.8669	4.69304	25.8669	up	-2021.11	-10.9809	2021.11	down	-5.277	-2.39972	5.277	down	-1651.26	-10.6893	1651.26	down
C31 H51 N10 O2	281.972	71.1892	155.439	307.108	340.134	451.2	4089.61	0.0205942	0.360622	0.111776	0.0148521	0.00241116	0.000538669	5.67054e-17	1	1	1	1	1	0.692728	7.29232e-14	42636	15.3798	42636	up	1.7694	0.823261	1.7694	up	23263.9	14.5058	23263.9	up	1.6457	0.718699	1.6457	up	3.88193	1.95678	3.88193	up	3.67799	1.87892	3.67799	up	1.22971e+06	20.2299	1.22971e+06	up
C31 H58 N13 O2	42.4528	274.238	714.918	16.9014	18.3216	1.05798	1233.99	0.548504	0.0243339	0.000124321	0.786406	0.472017	0.862561	9.18307e-08	1	1	0.159877	1	1	1	0.000118094	1.10369	0.142331	1.10369	up	-3.24383	-1.6977	3.24383	down	-21.333	-4.41501	21.333	down	95.9253	6.58384	95.9253	up	-25.264	-4.65901	25.264	down	469.385	8.87463	469.385	up	-20.6408	-4.36743	20.6408	down
C32 H35 N null 5.4249935	103.756	457.983	479.791	51.574	240.313	300.705	1145.07	0.197715	0.00127075	0.000951745	0.442766	0.00708662	0.00275255	5.71004e-08	1	1	1	1	1	1	7.34311e-05	-67.0448	-6.06705	67.0448	down	36.3293	5.18306	36.3293	up	-1578.57	-10.6244	1578.57	down	38.0264	5.24893	38.0264	up	-1869.45	-10.8684	1869.45	down	-15.2742	-3.93303	15.2742	down	-1527.35	-10.5768	1527.35	down
C32 H35 N12 O	355.293	54.671	270.679	447.532	86.627	177.381	1382.08	0.00554296	0.427776	0.0178925	0.00161049	0.103237	0.0208924	5.92501e-09	1	1	1	1	1	1	7.61956e-06	-437.499	-8.77314	437.499	down	-1.20362	-0.267382	1.20362	down	-10300.9	-13.3305	10300.9	down	-1.34343	-0.425921	1.34343	down	6.66557	2.73673	6.66557	up	-6.94876	-2.79676	6.94876	down	-9966.67	-13.2829	9966.67	down
C32 H38 N3	19.1802	17.1773	36.0817	16.7693	23.9243	4.37859	7549.42	0.375201	0.415137	0.161569	0.423793	0.119725	0.502738	9.5353e-41	1	1	1	1	1	1	1.22624e-37	13489390	23.6853	13489390	up	1.7694	0.823261	1.7694	up	785189	19.5827	785189	up	1.6457	0.718699	1.6457	up	676060	19.3668	676060	up	3.67799	1.87892	3.67799	up	575655	19.1348	575655	up
C32 H40 N9 O11	520.869	27.0225	10.3752	249.626	49.9573	23.4489	1027.66	0.00095605	0.673545	0.85878	0.0302723	0.229385	0.409008	5.38364e-07	1	1	1	1	1	1	0.000692336	-13.8073	-3.78736	13.8073	down	-1.37099	-0.455217	1.37099	down	-4179.79	-12.0292	4179.79	down	-1.36142	-0.445117	1.36142	down	-13.4019	-3.74437	13.4019	down	-1.46398	-0.549894	1.46398	down	-139.292	-7.12197	139.292	down
C32 H42 N15	32.5054	163.276	455.016	28.2863	226.806	95.0844	1340.76	0.641327	0.113198	0.00310614	0.679184	0.0147661	0.11019	5.18082e-08	1	1	1	1	1	1	6.66253e-05	4.41969	2.14395	4.41969	up	26.0009	4.70049	26.0009	up	-5.32728	-2.4134	5.32728	down	500.033	8.96588	500.033	up	-6.30895	-2.6574	6.30895	down	19662.6	14.2632	19662.6	up	-5.15443	-2.36581	5.15443	down
C32 H49 N4 O12	40.5968	14.6967	43.7372	1.26364	158.198	11.1267	1300.63	0.471262	0.760215	0.444904	0.976624	0.0173802	0.520623	1.13929e-09	1	1	1	1	1	1	1.46512e-06	-4.81983	-2.26898	4.81983	down	25.2444	4.65789	25.2444	up	-113.483	-6.82633	113.483	down	16.4485	4.03988	16.4485	up	-21.9016	-4.45296	21.9016	down	15.7102	3.97363	15.7102	up	-109.801	-6.77874	109.801	down
C32 H62 N6 O6	529.672	337.328	311.765	198.521	271.339	124.621	763.659	0.000165761	0.00309399	0.00464927	0.0298909	0.00220388	0.0348028	1.07349e-06	0.213168	1	1	1	1	1	0.00138051	1.62365	0.699245	1.62365	up	6397.95	12.6434	6397.95	up	-14.5012	-3.8581	14.5012	down	1093.37	10.0946	1093.37	up	-17.1734	-4.1021	17.1734	down	-18.1256	-4.17996	18.1256	down	-14.0307	-3.81052	14.0307	down
C32 H66 N4	172.918	385.896	335.19	1218.77	25.4029	688.116	2654.54	0.14373	0.0150633	0.0254518	6.92352e-06	0.446684	0.000159834	3.05267e-11	1	1	1	0.00890364	1	0.205547	3.92574e-08	4.90288e+06	22.2252	4.90288e+06	up	1.7694	0.823261	1.7694	up	38444.6	15.2305	38444.6	up	6.91911	2.79059	6.91911	up	900613	19.7805	900613	up	3.67799	1.87892	3.67799	up	305878	18.2226	305878	up
C33 H46 N2 O16	45.5903	2.95615	80.5109	2.67191	37.2618	15.5528	4100.44	0.131236	0.873577	0.0298	0.884985	0.0687116	0.236476	1.67076e-30	1	1	1	1	1	1	2.14859e-27	-3472.6	-11.7618	3472.6	down	-1.46538	-0.551275	1.46538	down	-81762.1	-16.3191	81762.1	down	-1.36786	-0.451924	1.36786	down	-10880.6	-13.4095	10880.6	down	-1.41244	-0.498189	1.41244	down	-79109.2	-16.2716	79109.2	down
C33 H46 N2 O16 nullnullnull 1.1050014	664.94	18.8573	30.8079	372.234	95.0297	54.5724	905.982	4.50653e-05	0.722476	0.588845	0.00264382	0.0737712	0.173419	3.54589e-07	0.057954	1	1	1	1	1	0.000456001	-13.9635	-3.80359	13.9635	down	-1.37237	-0.456673	1.37237	down	-4181.85	-12.0299	4181.85	down	-1.36285	-0.446625	1.36285	down	-1.66424	-0.734867	1.66424	down	-1.46476	-0.55066	1.46476	down	-766.945	-9.58298	766.945	down
C33 H48 N13	31.1247	164.326	450.689	69.9525	345.464	99.5178	1129.25	0.666223	0.123083	0.00416612	0.403927	0.00357526	0.110397	6.67304e-07	1	1	1	1	1	1	0.000858153	4.32693	2.11334	4.32693	up	27.6898	4.79128	27.6898	up	-1.1865	-0.246715	1.1865	down	493.197	8.94602	493.197	up	-6.4442	-2.688	6.4442	down	22270.8	14.4429	22270.8	up	-5.26494	-2.39642	5.26494	down
C33 H48 O12	323.271	352.406	176.448	181.877	145.319	69.6597	2453.59	0.0100565	0.00682635	0.0756193	0.0700419	0.0392476	0.15038	9.37103e-13	1	1	1	1	1	1	1.20511e-09	-19632.4	-14.2609	19632.4	down	-1.30377	-0.382689	1.30377	down	-2041.73	-10.9956	2041.73	down	-1.00037	-0.00052762	1.00037	down	1.21108	0.276297	1.21108	up	7.02369	2.81223	7.02369	up	-81115.7	-16.3077	81115.7	down
C33 H53 N4 O4	36.0669	253.126	383.747	773.568	312.103	0.605534	1189.49	0.713618	0.0997916	0.0320851	0.00132017	0.0179147	0.91533	1.07439e-05	1	1	1	1	1	1	0.0138167	2908.5	11.5061	2908.5	up	1.7694	0.823261	1.7694	up	26.7945	4.74387	26.7945	up	1.6457	0.718699	1.6457	up	778.552	9.60465	778.552	up	3.67799	1.87892	3.67799	up	1565.59	10.6125	1565.59	up
C33 H56 N6 S2	381.958	609.154	123.977	224.796	109.799	17.224	1534.57	0.0190281	0.00217794	0.26351	0.0922367	0.125197	0.540896	1.59155e-07	1	1	1	1	1	1	0.000204673	-2857.29	-11.4804	2857.29	down	-6.80976	-2.7676	6.80976	down	-2072.13	-11.0169	2072.13	down	-141.901	-7.14874	141.901	down	-2957.56	-11.5302	2957.56	down	-1.74596	-0.804019	1.74596	down	-278158	-18.0855	278158	down
C33 H72 N9 O3 S	4.12578	182.215	351.976	67.0307	567.232	342.534	1333.06	0.942774	0.0807854	0.0089734	0.388362	0.000136764	0.00251824	3.40247e-08	1	1	1	1	0.175879	1	4.37557e-05	25.1948	4.65505	25.1948	up	613.509	9.26094	613.509	up	1.07007	0.0977097	1.07007	up	8169.16	12.996	8169.16	up	-1.10672	-0.14629	1.10672	down	511081	18.9632	511081	up	1.10596	0.145295	1.10596	up
C34 H38 N2	33.5614	257.974	581.106	50.9094	5.82452	60.7803	1293.5	0.723616	0.0892882	0.00534032	0.612876	0.737961	0.281554	3.74632e-06	1	1	1	1	1	1	0.00481777	3.18528	1.67142	3.18528	up	-7.79606	-2.96275	7.79606	down	3.8436	1.94246	3.8436	up	-240.961	-7.91265	240.961	down	2.04071	1.02907	2.04071	up	-12449.4	-13.6038	12449.4	down	3.5214	1.81615	3.5214	up
C34 H42 N2 null 7.2579966	220.219	59.752	159.272	153.716	138.188	41.5559	2114.77	0.115768	0.550054	0.207615	0.219071	0.0992835	0.362908	7.60633e-09	1	1	1	1	1	1	9.78174e-06	-11.5197	-3.52603	11.5197	down	35.1259	5.13446	35.1259	up	-271.23	-8.08337	271.23	down	1.14479	0.195089	1.14479	up	-321.21	-8.32737	321.21	down	790.457	9.62654	790.457	up	-262.43	-8.03579	262.43	down
C34 H43 N2 O5	439.015	123.458	46.8621	229.726	55.5249	35.8339	1589.09	0.0492974	0.418193	0.716499	0.200707	0.375931	0.476479	9.33197e-06	1	1	1	1	1	1	0.0120009	23.5182	4.5557	23.5182	up	-469.032	-8.87354	469.032	down	98.5851	6.6233	98.5851	up	-4.6798	-2.22645	4.6798	down	635.116	9.31088	635.116	up	2.11137	1.07818	2.11137	up	164.246	7.35971	164.246	up
C34 H43 N2 O5 nullnullnull 4.536995	568.269	24.316	272.616	148.311	96.5754	9.46587	942.933	0.00371272	0.772697	0.0613137	0.213267	0.155918	0.654859	2.70773e-05	1	1	1	1	1	1	0.0348214	2117.12	11.0479	2117.12	up	24.4326	4.61074	24.4326	up	77.9484	6.28445	77.9484	up	-1.07592	-0.105573	1.07592	down	78.9931	6.30365	78.9931	up	-10.2071	-3.3515	10.2071	down	156.468	7.28972	156.468	up
C34 H49 N8	184.874	106.185	205.661	203.707	62.8742	115.091	7249.39	0.00147575	0.0205497	0.000758841	0.000807382	0.030731	0.00390224	5.77915e-36	1	1	0.975869	1	1	1	7.43199e-33	6.47763e+06	22.627	6.47763e+06	up	1.7694	0.823261	1.7694	up	1925053	20.8765	1925053	up	1.6457	0.718699	1.6457	up	694.045	9.43889	694.045	up	3.67799	1.87892	3.67799	up	3.4491e+06	21.7178	3.4491e+06	up
C35 H44 N2 O8	13.4631	60.9228	47.8659	12.1851	71.815	1.74355	4350.55	0.656278	0.154392	0.228589	0.682906	0.0368986	0.741412	2.08027e-26	1	1	1	1	1	1	2.67523e-23	-660.362	-9.36711	660.362	down	3.13671	1.64925	3.13671	up	-15548.2	-13.9245	15548.2	down	4.16482	2.05825	4.16482	up	-2325.36	-11.1832	2325.36	down	28.4993	4.83286	28.4993	up	-15043.7	-13.8769	15043.7	down
C35 H68 O	209.067	204.351	236.546	146.824	66.7434	48.8008	3724.75	0.242417	0.250141	0.202032	0.367541	0.339966	0.414137	4.91916e-10	1	1	1	1	1	1	6.32604e-07	491278	18.9062	491278	up	1.7694	0.823261	1.7694	up	92889.8	16.5032	92889.8	up	1.6457	0.718699	1.6457	up	9910.37	13.2747	9910.37	up	3.67799	1.87892	3.67799	up	74260.2	16.1803	74260.2	up
C36 H68 N12 O2	55.9243	720.208	1328.35	115.52	120.596	32.1792	1457.77	0.461294	0.000137289	3.01371e-07	0.205858	0.0703625	0.345935	1.40743e-08	1	0.176553	0.000387564	1	1	1	1.80996e-05	3.75905	1.91037	3.75905	up	-3.28341	-1.7152	3.28341	down	-6.26353	-2.64698	6.26353	down	638.339	9.31818	638.339	up	-7.41772	-2.89098	7.41772	down	253714	17.9528	253714	up	-6.0603	-2.59939	6.0603	down
C36 H74 N5 O7	118.126	176	37.1083	210.811	29.1342	0.00785946	3340.45	0.0872149	0.0279442	0.456567	0.0143298	0.268282	0.985432	7.635e-19	1	1	1	1	1	1	9.81861e-16	-2041.38	-10.9953	2041.38	down	-1.1714	-0.228239	1.1714	down	-48064.1	-15.5527	48064.1	down	-109.212	-6.77098	109.212	down	-56921	-15.7967	56921	down	9.03646	3.17576	9.03646	up	-46504.7	-15.5051	46504.7	down
C36 H76 N7 O6	39.7165	59.4572	45.1117	10.5334	4.88278	0.0124822	3564.1	0.163406	0.068595	0.128631	0.613074	0.501325	0.972837	6.27724e-29	1	1	1	1	1	1	8.07253e-26	-383.447	-8.58288	383.447	down	3.89042	1.95993	3.89042	up	-9028.24	-13.1402	9028.24	down	1.72486	0.786479	1.72486	up	-10691.9	-13.3842	10691.9	down	3.4842	1.80083	3.4842	up	-8735.31	-13.0926	8735.31	down
C37 H45 N11 O2	77.8731	23.4169	186.065	0.431865	388.525	207.42	789.586	0.379397	0.745164	0.102864	0.994568	0.00250918	0.0250741	2.88343e-05	1	1	1	1	1	1	0.0370809	21.0944	4.39879	21.0944	up	626.034	9.2901	626.034	up	-1.11617	-0.158555	1.11617	down	2094.27	11.0322	2094.27	up	-1.32185	-0.402554	1.32185	down	3563.64	11.7991	3563.64	up	-1.07995	-0.11097	1.07995	down
C37 H50 N O10	500.654	51.2531	292.957	408.793	102.327	269.202	1803.42	0.0085569	0.596346	0.0572302	0.0195907	0.153633	0.0220989	5.60731e-08	1	1	1	1	1	1	7.21101e-05	83359.2	16.3471	83359.2	up	-46.1055	-5.52687	46.1055	down	140.698	7.13646	140.698	up	-11.7522	-3.55486	11.7522	down	421.768	8.7203	421.768	up	4.30585	2.1063	4.30585	up	206.459	7.68971	206.459	up
C37 H79 N9 S	218.106	163.772	370.419	186.075	343.136	174.635	2809.75	0.00676665	0.0220667	0.000297894	0.0135205	0.000104389	0.00454683	1.72778e-18	1	1	0.383092	1	0.134244	1	2.22192e-15	-663.962	-9.37496	663.962	down	2.68236	1.42351	2.68236	up	-15633	-13.9323	15633	down	7.26441	2.86085	7.26441	up	-18513.7	-14.1763	18513.7	down	4.92875	2.30122	4.92875	up	-15125.7	-13.8847	15125.7	down
C38 H70 N3 O2 S	74.449	14.5139	83.9999	7.07663	0.414544	21.7632	3043.38	0.181342	0.712354	0.1465	0.847241	0.889424	0.315402	7.34645e-19	1	1	1	1	1	1	9.44753e-16	-293.171	-8.1956	293.171	down	-1.02256	-0.0321875	1.02256	down	-6902.69	-12.7529	6902.69	down	3.29102	1.71853	3.29102	up	-8174.66	-12.9969	8174.66	down	-4.06757	-2.02417	4.06757	down	-6678.72	-12.7054	6678.72	down
C38 H78 N4 O7	281.921	238.44	191.092	129.457	74.682	118.158	3506.79	0.0124811	0.0237336	0.0484169	0.125124	0.120536	0.0519458	1.00579e-16	1	1	1	1	1	1	1.29345e-13	-18644.8	-14.1865	18644.8	down	-2.21011	-1.14412	2.21011	down	-306005	-18.2232	306005	down	-5.01437	-2.32607	5.01437	down	-13.0908	-3.71048	13.0908	down	-1.39043	-0.47553	1.39043	down	-316747	-18.273	316747	down
C38 H78 N4 O7 nullnullnull 4.196997	228.822	104.322	73.317	124.412	88.5623	134.877	2522.83	0.0576132	0.264768	0.391029	0.206109	0.13387	0.0653928	9.51371e-12	1	1	1	1	1	1	1.22346e-08	-11111.2	-13.4397	11111.2	down	-2.16537	-1.11461	2.16537	down	-5638.22	-12.461	5638.22	down	-4.95202	-2.30802	4.95202	down	-12.8142	-3.67967	12.8142	down	-1.37653	-0.461037	1.37653	down	-262407	-18.0014	262407	down
C38 H81 N8 O3 S	407.423	0.0590356	106.785	364.242	39.7139	0.98593	1513.11	0.000111169	0.998503	0.0732163	0.000263806	0.159914	0.823607	5.16342e-13	0.142964	1	1	0.339255	1	1	6.64016e-10	-134.898	-7.07572	134.898	down	-1.63325	-0.707748	1.63325	down	-3176.16	-11.6331	3176.16	down	-69.6039	-6.1211	69.6039	down	-3761.43	-11.8771	3761.43	down	6.91563	2.78986	6.91563	up	-3073.1	-11.5855	3073.1	down
C39 H53 N3 O2 nullnullnull 7.1779943	239.269	537.623	314.831	496.008	114.953	168.59	6141.01	0.000485325	2.17333e-07	5.87086e-05	5.8061e-07	0.00558876	0.000910688	1.6927e-32	0.624128	0.00027949	0.0754992	0.000746664	1	1	2.17682e-29	23147630	24.4644	23147630	up	1.7694	0.823261	1.7694	up	657629	19.3269	657629	up	1.6457	0.718699	1.6457	up	1.40288e+06	20.42	1.40288e+06	up	3.67799	1.87892	3.67799	up	1.90048e+06	20.8579	1.90048e+06	up
C39 H73 O5	19.7552	121.582	228.987	31.6461	10.7018	4.15182	3206.52	0.648119	0.07496	0.0087746	0.500446	0.493941	0.66975	9.14561e-19	1	1	1	1	1	1	1.17613e-15	-25.2686	-4.65927	25.2686	down	3.32235	1.7322	3.32235	up	-594.947	-9.21662	594.947	down	10.3623	3.37327	10.3623	up	-704.579	-9.46062	704.579	down	236.44	7.88533	236.44	up	-575.644	-9.16903	575.644	down
C39 H80 N5 O7	396.733	314.523	72.9975	658.526	110.249	26.9465	1985.61	0.00266946	0.00844266	0.311908	8.54342e-05	0.0625903	0.352929	1.2629e-11	1	1	1	0.109868	1	1	1.62409e-08	-2058.32	-11.0073	2058.32	down	-6.8702	-2.78035	6.8702	down	-48463	-15.5646	48463	down	-1790.78	-10.8064	1790.78	down	-57393.4	-15.8086	57393.4	down	19.8965	4.31444	19.8965	up	-46890.6	-15.517	46890.6	down
C4 H N2 O S	84.673	19.7052	126.28	365.458	7.47077	81.3677	2288.59	0.102976	0.581692	0.0354204	0.000131698	0.522014	0.037128	1.27163e-17	1	1	1	0.169364	1	1	1.63532e-14	-1356.43	-10.4056	1356.43	down	-1.4194	-0.505281	1.4194	down	-6621.71	-12.693	6621.71	down	-1.12251	-0.166728	1.12251	down	-37822.2	-15.2069	37822.2	down	1.15279	0.205132	1.15279	up	-11.0652	-3.46795	11.0652	down
C4 H2 N2 O S2	78.7388	1.19697	27.3179	103.536	80.3422	33.3247	2044.06	0.263009	0.979539	0.625676	0.174427	0.0999724	0.286781	2.45071e-12	1	1	1	1	1	1	3.15161e-09	-460.037	-8.84561	460.037	down	4.29558	2.10285	4.29558	up	-18.424	-4.20351	18.424	down	3.19394	1.67533	3.19394	up	-132.446	-7.04926	132.446	down	5.16518	2.36882	5.16518	up	-10480.1	-13.3554	10480.1	down
C4 H4 N O6 S2 nullnullnull 1.5440011	76.6063	13.2732	16.1803	105.678	5.50777	13.0112	2032.64	0.403947	0.853268	0.824199	0.288038	0.717441	0.578302	1.13956e-09	1	1	1	1	1	1	1.46547e-06	-14247	-13.7984	14247	down	-1.03732	-0.0528653	1.03732	down	-196.972	-7.62184	196.972	down	-1.81282	-0.858238	1.81282	down	-155.87	-7.2842	155.87	down	-1.1415	-0.190929	1.1415	down	-6763.4	-12.7235	6763.4	down
C4 H5 N O	0.3352	17.9955	71.9081	50.9768	10.4776	0.0229619	1377.62	0.995989	0.806406	0.426434	0.54539	0.617673	0.981341	1.95666e-07	1	1	1	1	1	1	0.000251627	-21.7	-4.43963	21.7	down	5.61524	2.48935	5.61524	up	-61.8329	-5.9503	61.8329	down	8.30775	3.05446	8.30775	up	-97.235	-6.6034	97.235	down	4.17556	2.06197	4.17556	up	-289.124	-8.17555	289.124	down
C4 H6 N O4	9.07709	24.3945	82.3794	109.852	34.6676	3.07936	2024.49	0.896472	0.746043	0.375288	0.272222	0.36354	0.785999	1.09959e-09	1	1	1	1	1	1	1.41407e-06	-138.127	-7.10985	138.127	down	36.678	5.19684	36.678	up	-14.6256	-3.87042	14.6256	down	47.5298	5.57076	47.5298	up	-26.283	-4.71606	26.283	down	25.0456	4.64649	25.0456	up	-74.7986	-6.22494	74.7986	down
C4 H7 N	64.1745	18.365	16.104	906.078	70.658	165.444	666.132	0.341624	0.733005	0.761469	2.64986e-06	0.125641	0.0203975	9.65092e-06	1	1	1	0.00340772	1	1	0.0124111	-6.58866	-2.71998	6.58866	down	-7.14464	-2.83686	7.14464	down	-155.13	-7.27733	155.13	down	30.9731	4.95294	30.9731	up	-183.716	-7.52133	183.716	down	68.6197	6.10055	68.6197	up	-1.65975	-0.730964	1.65975	down
C4 H7 N O2	2.34678	3.90541	14.3179	34.7852	130.286	169.509	1959.81	0.954882	0.926077	0.755206	0.507426	0.0264932	0.0117868	4.73516e-13	1	1	1	1	1	1	6.08942e-10	-44.785	-5.48494	44.785	down	-2.56713	-1.36016	2.56713	down	-137.541	-7.10372	137.541	down	2.35301	1.23451	2.35301	up	-240.731	-7.91128	240.731	down	1.33972	0.421929	1.33972	up	-3156.09	-11.6239	3156.09	down
C4 H9 N null 6.989994	101.879	13.9744	63.3904	17.8492	25.563	0.0525813	1030.79	0.311567	0.85029	0.481931	0.813005	0.443114	0.972196	5.67142e-06	1	1	1	1	1	1	0.00729345	-14.7516	-3.8828	14.7516	down	7.07477	2.82268	7.07477	up	-1.76934	-0.823211	1.76934	down	42.7351	5.41735	42.7351	up	-15.6675	-3.96971	15.6675	down	24.294	4.60253	24.294	up	-48.1707	-5.59008	48.1707	down
C41 H58 N4 O2	23.8548	202.915	54.9442	171.224	500.359	86.921	960.082	0.748445	0.0912384	0.514803	0.131265	0.000814106	0.149673	7.06896e-06	1	1	1	1	1	1	0.00909069	89.9237	6.49063	89.9237	up	-8.70584	-3.12198	8.70584	down	-3.35072	-1.74447	3.35072	down	-9.36025	-3.22655	9.36025	down	2.3859	1.25454	2.3859	up	-4.18819	-2.06633	4.18819	down	162.448	7.34383	162.448	up
C41 H81 N2 O5	285.469	39.7507	41.8115	282.583	66.4035	37.4492	3059.45	0.00524104	0.459286	0.441326	0.00550692	0.10934	0.227413	3.71236e-17	1	1	1	1	1	1	4.77409e-14	-6309.98	-12.6234	6309.98	down	-1.75236	-0.809295	1.75236	down	-148568	-17.1808	148568	down	-40.3018	-5.33277	40.3018	down	-175945	-17.4248	175945	down	-1.15307	-0.205476	1.15307	down	-31665.4	-14.9506	31665.4	down
C43 H69 N9 O2	806.406	142.421	140.286	1209.99	0.474388	21.3463	632.712	5.12804e-06	0.0847235	0.0878112	4.02746e-08	0.896584	0.384478	9.41757e-06	0.00659466	1	1	5.17932e-05	1	1	0.012111	-532.008	-9.05531	532.008	down	-8701.67	-13.0871	8701.67	down	-12526.1	-13.6127	12526.1	down	-34991.7	-15.0947	34991.7	down	-14834.3	-13.8566	14834.3	down	39.9957	5.32177	39.9957	up	-12119.7	-13.5651	12119.7	down
C5 H10 O S	38.2884	10.3895	158.541	90.3744	0.000734222	53.5909	1061.18	0.65777	0.89213	0.181931	0.374882	0.996804	0.281053	7.24549e-06	1	1	1	1	1	1	0.00931771	-3.1077	-1.63585	3.1077	down	24.6841	4.62551	24.6841	up	-12.1703	-3.6053	12.1703	down	145.085	7.18076	145.085	up	-36.6143	-5.19433	36.6143	down	19.8119	4.30829	19.8119	up	-10.8289	-3.43682	10.8289	down
C5 H11 N nullnullnull 6.200994	101.824	142.012	4.34941	930.698	24.3238	160.166	1375.96	0.345569	0.229107	0.955018	0.00016264	0.475225	0.0695801	8.00631e-07	1	1	1	0.209155	1	1	0.00102961	-239.665	-7.90487	239.665	down	30.2588	4.91928	30.2588	up	-4.42694	-2.14631	4.42694	down	42.2138	5.39964	42.2138	up	-2.61899	-1.38901	2.61899	down	-45.1307	-5.49604	45.1307	down	-5459.8	-12.4146	5459.8	down
C5 H11 N O2 nullnullnull 7.1829977	14.1358	146.819	82.5143	42.0098	0.761052	0.460518	9538.49	0.758845	0.0627071	0.205534	0.443052	0.863362	0.8935	1.9389e-30	1	1	1	1	1	1	2.49342e-27	143294688	27.0944	143294688	up	6.66576	2.73677	6.66576	up	7.69766e+06	22.876	7.69766e+06	up	1.6457	0.718699	1.6457	up	6.53121e+06	22.6389	6.53121e+06	up	24.4491	4.61171	24.4491	up	17695808	24.0769	17695808	up
C5 H13 N O null 1.5229995	363.757	2.66206	236.208	148.211	85.877	0.000893582	2590.3	0.030946	0.973677	0.100846	0.233108	0.193587	0.996634	4.30927e-10	1	1	1	1	1	1	5.54172e-07	-5.94686	-2.57213	5.94686	down	844.448	9.72186	844.448	up	2.10383	1.07302	2.10383	up	343.097	8.42247	343.097	up	-165.82	-7.37347	165.82	down	117.16	6.87234	117.16	up	-135.476	-7.08189	135.476	down
C5 H13 N O nullnullnull 0.8730006	43.5117	29.5078	10.7505	46.1778	0.726543	20.6827	249.764	0.129581	0.247047	0.597131	0.114748	0.79181	0.161751	5.34887e-06	1	1	1	1	1	1	0.00687865	173.215	7.43642	173.215	up	1.17573	0.233557	1.17573	up	6.19267	2.63056	6.19267	up	1.79177	0.841382	1.79177	up	7.55572	2.91757	7.55572	up	-3.10366	-1.63397	3.10366	down	11.541	3.5287	11.541	up
C5 H5 N2 S	21.6833	23.179	202.604	74.0419	94.1203	5.05044	2414.78	0.796939	0.7846	0.126471	0.463334	0.16399	0.745603	6.20373e-10	1	1	1	1	1	1	7.97799e-07	-49.0318	-5.61565	49.0318	down	7.84762	2.97226	7.84762	up	-110.414	-6.78678	110.414	down	12.1576	3.60379	12.1576	up	-188.958	-7.56192	188.958	down	25.3831	4.6658	25.3831	up	-4568.87	-12.1576	4568.87	down
C5 H7 N4 S	63.7379	114.017	52.6091	432.062	782.806	17.71	1423.62	0.462356	0.254451	0.528402	0.00718591	3.95607e-05	0.512469	1.04598e-07	1	1	1	1	0.0508751	1	0.000134513	-2.33691	-1.2246	2.33691	down	-8510.08	-13.055	8510.08	down	-31.6755	-4.9853	31.6755	down	-2150.58	-11.0705	2150.58	down	-50.918	-5.6701	50.918	down	-1069.71	-10.063	1069.71	down	23.7421	4.56938	23.7421	up
C5 H9 N O2	1079.05	124.144	293.739	1153.95	46.6273	1.71455	2661.31	4.41753e-07	0.133415	0.0100733	1.93132e-07	0.216293	0.811644	3.01345e-14	0.000568094	1	1	0.000248368	1	1	3.8753e-11	104870064	26.644	104870064	up	55.254	5.78801	55.254	up	5436586	22.3743	5436586	up	3579631	21.7714	3579631	up	4143685	21.9825	4143685	up	1011.54	9.98234	1011.54	up	6428517	22.6161	6428517	up
C5 H9 N O2 null 5.480999	54.683	250.213	530.007	46.8639	67.642	0.79722	1406.4	0.526085	0.0578051	0.00304258	0.576292	0.209493	0.89105	1.76612e-07	1	1	1	1	1	1	0.000227124	4.53048	2.17966	4.53048	up	7.12146	2.83217	7.12146	up	1.11474	0.156707	1.11474	up	196.401	7.61766	196.401	up	-6.15466	-2.62168	6.15466	down	12654.3	13.6273	12654.3	up	-5.02839	-2.3301	5.02839	down
C5 H9 N O2 null 7.841994	66.3227	34.0039	528.934	142.872	71.8793	1.1273	3515.46	0.513494	0.709464	0.00670422	0.241479	0.231148	0.880223	2.05777e-12	1	1	1	1	1	1	2.6463e-09	-66.0552	-6.0456	66.0552	down	9.91839	3.31011	9.91839	up	-27.3892	-4.77554	27.3892	down	502.417	8.97274	502.417	up	-107.14	-6.74335	107.14	down	1274.89	10.3162	1274.89	up	-1504.8	-10.5554	1504.8	down
C5 H9 N5 O3	211.716	455.52	282.106	116.906	171.1	319.368	1346.58	0.0529233	0.00234891	0.0209452	0.191669	0.0292338	0.0032966	2.58481e-08	1	1	1	1	1	1	3.32407e-05	59.6416	5.89825	59.6416	up	-21.654	-4.43656	21.654	down	2.98973	1.58002	2.98973	up	-23.0301	-4.52545	23.0301	down	2.43203	1.28216	2.43203	up	-394680	-18.5903	394680	down	4.54079	2.18294	4.54079	up
C6 H13 N O2 null 6.1960006	189.743	279.682	615.511	120.674	22.7379	24.3148	3661.34	0.0900922	0.0303594	0.000681168	0.212453	0.442481	0.427146	6.00827e-15	1	1	0.875982	1	1	1	7.72664e-12	-15.062	-3.91284	15.062	down	-4.60298	-2.20257	4.60298	down	-46.8	-5.54844	46.8	down	2356.68	11.2025	2356.68	up	-419.983	-8.71419	419.983	down	897.864	9.81035	897.864	up	-343.128	-8.4226	343.128	down
C6 H15 N O2 S	78.4957	1.29602	102.193	181.725	920.912	713.184	1605.5	0.368218	0.983419	0.27379	0.103037	6.1624e-06	5.39582e-05	1.13185e-08	1	1	1	1	0.00792485	0.0693902	1.45556e-05	1302203	20.3125	1302203	up	1111.52	10.1183	1111.52	up	66239.5	16.0154	66239.5	up	33220.6	15.0198	33220.6	up	4269.29	12.0598	4269.29	up	20979.7	14.3567	20979.7	up	93216.3	16.5083	93216.3	up
C6 H15 N O2 S null 6.314005	84.0486	185.821	676.875	53.0072	47.5232	2.68709	2673.03	0.364696	0.111479	0.000594938	0.527612	0.285716	0.79888	1.06013e-11	1	1	0.76509	1	1	1	1.36333e-08	-1.88349	-0.91341	1.88349	down	5.19751	2.37782	5.19751	up	-7.27564	-2.86307	7.27564	down	4249.48	12.0531	4249.48	up	-52.5185	-5.71476	52.5185	down	3050.21	11.5747	3050.21	up	-42.9079	-5.42317	42.9079	down
C6 H15 N3	465.546	11.7715	63.4653	233.468	2.86748	49.0325	1317.21	0.0059425	0.870333	0.475883	0.0699237	0.795315	0.285182	3.85926e-07	1	1	1	1	1	1	0.000496301	-22.1842	-4.47146	22.1842	down	7.59052	2.9242	7.59052	up	-522.326	-9.02881	522.326	down	-62.3101	-5.96139	62.3101	down	-618.576	-9.27281	618.576	down	-1.18378	-0.243405	1.18378	down	-505.379	-8.98122	505.379	down
C6 H5 N2	82.9541	234.521	463.041	153.573	51.3112	13.1166	2816.25	0.340141	0.0513012	0.00352198	0.139182	0.248372	0.558136	9.59832e-13	1	1	1	1	1	1	1.23434e-09	-5.60594	-2.48696	5.60594	down	1.54891	0.631251	1.54891	up	-21.0686	-4.39702	21.0686	down	1345.96	10.3944	1345.96	up	-13.2028	-3.72277	13.2028	down	2474.87	11.2731	2474.87	up	-127.709	-6.99672	127.709	down
C6 H7 N3 O2	144.174	446.27	254.428	168.4	5.10404	9.4633	782.145	0.054338	0.000235934	0.00678635	0.0340509	0.644511	0.530087	2.05971e-07	1	0.303411	1	1	1	1	0.000264879	42.4506	5.40771	42.4506	up	-5.17454	-2.37143	5.17454	down	1.76197	0.817188	1.76197	up	1.30906	0.388531	1.30906	up	-1.00165	-0.00237742	1.00165	down	-5606.91	-12.453	5606.91	down	4.73198	2.24244	4.73198	up
C7 H11 N3 O8	48.9879	520.776	127.416	160.591	154.339	2.70584	1952.3	0.453138	0.000477595	0.132108	0.0794018	0.0277654	0.767068	1.4943e-11	1	0.614187	1	1	1	1	1.92167e-08	2.46518	1.30169	2.46518	up	-1516.88	-10.5669	1516.88	down	6.12348	2.61435	6.12348	up	-109.514	-6.77497	109.514	down	-15.8314	-3.98471	15.8314	down	-9577.51	-13.2254	9577.51	down	1.82432	0.867356	1.82432	up
C7 H17 N2 S	237.118	141.69	83.1123	4.63869	204.94	235.734	1058.41	0.047894	0.157857	0.334824	0.93994	0.0219968	0.0142854	1.09685e-06	1	1	1	1	1	1	0.00141055	101.524	6.66568	101.524	up	-15.5897	-3.96252	15.5897	down	5.35675	2.42136	5.35675	up	-67.0887	-6.068	67.0887	down	1.34347	0.425965	1.34347	up	-5127.17	-12.3239	5127.17	down	10.6026	3.40635	10.6026	up
C7 H4 N O8 S2 null 2.3289983	417.57	158.048	11.654	854.508	7.03981	7.05271	872.355	0.000560142	0.0489333	0.793575	8.64586e-07	0.598166	0.597831	1.08424e-07	0.720342	1	1	0.00111186	1	1	0.000139433	-955.269	-9.89976	955.269	down	-3173.66	-11.6319	3173.66	down	-22491.8	-14.4571	22491.8	down	-824.377	-9.68716	824.377	down	-26636.4	-14.7011	26636.4	down	1.10884	0.149056	1.10884	up	-21762	-14.4095	21762	down
C7 H7 N2	5.97699	37.638	49.663	88.8578	4.99106	21.4043	3725.49	0.913233	0.566756	0.473598	0.265369	0.697981	0.422418	1.66972e-16	1	1	1	1	1	1	2.14726e-13	-1025.67	-10.0023	1025.67	down	-3.21	-1.68257	3.21	down	-3655.19	-11.8357	3655.19	down	13.91	3.79805	13.91	up	-2038.74	-10.9935	2038.74	down	6.03196	2.59263	6.03196	up	-3327.94	-11.7004	3327.94	down
C7 H9 N O2	837.764	25.852	151.106	613.42	67.6075	99.8991	1831.6	0.000118034	0.72953	0.164338	0.00107692	0.202134	0.122015	3.74427e-09	0.151791	1	1	1	1	1	4.81513e-06	1.2959e+06	20.3055	1.2959e+06	up	46.9874	5.5542	46.9874	up	66872.9	16.0291	66872.9	up	4718.35	12.2041	4718.35	up	75339.5	16.2011	75339.5	up	-1.2784	-0.354337	1.2784	down	151081	17.205	151081	up
C7 N O5 S2	301.512	203.86	24.0253	285.819	7.61083	59.8882	1776.78	0.0324584	0.0951342	0.751822	0.0384995	0.671395	0.236009	8.38542e-09	1	1	1	1	1	1	1.07837e-05	-1055.63	-10.0439	1055.63	down	-95.0907	-6.57123	95.0907	down	-24854.7	-14.6012	24854.7	down	-703.865	-9.45916	703.865	down	-2688.11	-11.3924	2688.11	down	7.43326	2.89399	7.43326	up	-24048.3	-14.5536	24048.3	down
C7 N O5 S2 null 1.6640011	48.549	25.1471	6.03368	121.819	1.12562	1.5859	2285.82	0.293689	0.527412	0.856818	0.0497961	0.810715	0.776209	7.57368e-17	1	1	1	1	1	1	9.73976e-14	-767.426	-9.58388	767.426	down	-5.76874	-2.52826	5.76874	down	-18069	-14.1412	18069	down	-1.08446	-0.116977	1.08446	down	-2770.93	-11.4362	2770.93	down	1.10079	0.138539	1.10079	up	-3846.82	-11.9095	3846.82	down
C8 H10 O6 null 7.3209977	336.43	213.925	569.173	37.925	61.0996	27.6249	3323.47	0.0212204	0.0823743	0.00183905	0.634311	0.228324	0.416646	2.21223e-13	1	1	1	1	1	1	2.84492e-10	-1.34868	-0.431545	1.34868	down	54.9046	5.77885	54.9046	up	1.131	0.177593	1.131	up	2261.4	11.143	2261.4	up	-37.606	-5.23289	37.606	down	5626.24	12.458	5626.24	up	-30.7242	-4.9413	30.7242	down
C8 H13 N O2 S	15.4136	43.4232	93.3517	124.8	5.70027	3.44488	1100.01	0.860424	0.655777	0.406111	0.301267	0.739491	0.795988	1.51442e-05	1	1	1	1	1	1	0.0194754	-74.2939	-6.21517	74.2939	down	8.28465	3.05044	8.28465	up	-20.5324	-4.35983	20.5324	down	8.89099	3.15234	8.89099	up	-17.2928	-4.1121	17.2928	down	5.33935	2.41667	5.33935	up	-16.354	-4.03157	16.354	down
C8 H13 N O2 S null 6.460999	23.0147	158.434	38.2099	205.165	156.868	0.369039	3822.74	0.715518	0.105973	0.574594	0.0560744	0.0356055	0.917574	2.28181e-16	1	1	1	1	1	1	2.9344e-13	-67.2021	-6.07043	67.2021	down	285.315	8.15641	285.315	up	-222.604	-7.79833	222.604	down	306.131	8.25801	306.131	up	-7.64934	-2.93534	7.64934	down	183.851	7.52239	183.851	up	-1530.93	-10.5802	1530.93	down
C8 H16 N2 O9	382.263	18.5506	63.5784	511.209	0.00116032	143.801	1604.84	0.029551	0.836126	0.543467	0.0096882	0.996233	0.0996375	3.99703e-07	1	1	1	1	1	1	0.000514018	115.539	6.85223	115.539	up	-547.102	-9.09567	547.102	down	1.89367	0.921182	1.89367	up	-143.915	-7.16908	143.915	down	337.48	8.39866	337.48	up	-4.60301	-2.20258	4.60301	down	99.7482	6.64022	99.7482	up
C8 H19 N O8	193.708	130.821	94.3685	33.8531	3.00687	33.2207	463.973	0.00696688	0.0324824	0.081756	0.399254	0.685627	0.180907	3.16258e-06	1	1	1	1	1	1	0.00406708	164.596	7.36279	164.596	up	1.96134	0.971843	1.96134	up	10.8037	3.43345	10.8037	up	3.00315	1.58647	3.00315	up	5.61	2.488	5.61	up	-174.135	-7.44406	174.135	down	13.0533	3.70634	13.0533	up
C8 H19 N O8 null 10.049997	1335.2	11.2567	51.3396	1393.33	17.4444	48.6561	4902.17	1.04383e-08	0.818034	0.403652	5.59671e-09	0.432038	0.191121	4.25562e-21	1.34236e-05	1	1	7.19737e-06	1	1	5.47273e-18	2.44642e+06	21.2222	2.44642e+06	up	1.7694	0.823261	1.7694	up	4796327	22.1935	4796327	up	1.6457	0.718699	1.6457	up	3.88193	1.95678	3.88193	up	3.67799	1.87892	3.67799	up	5835486	22.4764	5835486	up
C8 H19 N10 O3	156.33	168.792	212.94	138.02	32.7975	72.6868	1754.98	0.0438058	0.0345216	0.0150304	0.0623377	0.245557	0.0855953	1.23059e-12	1	1	1	1	1	1	1.58254e-09	1332.55	10.38	1332.55	up	1.7694	0.823261	1.7694	up	1346.25	10.3947	1346.25	up	1.6457	0.718699	1.6457	up	28.8594	4.85097	28.8594	up	3.67799	1.87892	3.67799	up	190304	17.5379	190304	up
C8 H19 N6 null 0.58100057	194.744	206.813	291.285	171.566	15.4731	1.28788	1500.52	0.149117	0.132953	0.0601532	0.186063	0.579123	0.872741	5.6206e-07	1	1	1	1	1	1	0.000722809	599192	19.1927	599192	up	1.7694	0.823261	1.7694	up	29.6462	4.88978	29.6462	up	1.6457	0.718699	1.6457	up	58.5609	5.87187	58.5609	up	3.67799	1.87892	3.67799	up	263.878	8.04373	263.878	up
C8 H5 N2	61.1463	182.035	376.422	124.699	53.1518	19.162	4513.77	0.524537	0.151331	0.0223182	0.271444	0.290913	0.524983	5.89362e-15	1	1	1	1	1	1	7.5792e-12	-112.161	-6.80943	112.161	down	1.26528	0.339451	1.26528	up	-319.879	-8.32138	319.879	down	491.378	8.94069	491.378	up	-162.088	-7.34063	162.088	down	1056.47	10.045	1056.47	up	-2555.14	-11.3192	2555.14	down
C8 H7 N2	10.3454	18.9195	15.141	1.08172	243.086	44.7082	2137.55	0.861671	0.761996	0.804375	0.984525	0.00992137	0.259867	2.67407e-11	1	1	1	1	1	1	3.43885e-08	-83.2015	-6.37854	83.2015	down	3.58114	1.84042	3.58114	up	-59.7169	-5.90007	59.7169	down	3.82386	1.93503	3.82386	up	-80.7238	-6.33492	80.7238	down	15.2286	3.92871	15.2286	up	-1428.65	-10.4804	1428.65	down
C8 H7 N2 O null 11.946008	1040.33	77.0521	15.1407	1296.93	39.6449	6.23	1537.09	1.03992e-07	0.230731	0.746129	4.80532e-09	0.218618	0.62426	4.59007e-11	0.000133734	1	1	6.17964e-06	1	1	5.90283e-08	-7339.92	-12.8415	7339.92	down	-4.67174	-2.22396	4.67174	down	-34654.1	-15.0807	34654.1	down	-87133.5	-16.4109	87133.5	down	-204663	-17.6429	204663	down	-5.66035	-2.50089	5.66035	down	-167211	-17.3513	167211	down
C9 H11 N2 S	1652.61	76.738	4.7669	1590.45	52.947	3.87108	1879	1.06068e-16	0.0587169	0.833041	2.56308e-16	0.0473782	0.587161	5.73051e-19	1.36403e-13	1	1	3.29612e-13	1	1	7.36943e-16	-7021.21	-12.7775	7021.21	down	-1.54127	-0.624115	1.54127	down	-165314	-17.3348	165314	down	-461805	-18.8169	461805	down	-195776	-17.5788	195776	down	3.74728	1.90584	3.74728	up	-159950	-17.2873	159950	down
C9 H11 N2 S null 13.334994	723.317	32.9901	95.318	759.469	10.8252	37.0748	5830.35	2.90933e-07	0.431777	0.0929517	1.57876e-07	0.457645	0.171228	1.39983e-27	0.00037414	1	1	0.000203029	1	1	1.80018e-24	10646584	23.3439	10646584	up	1.7694	0.823261	1.7694	up	2.14904e+06	21.0353	2.14904e+06	up	1.6457	0.718699	1.6457	up	55.8389	5.8032	55.8389	up	3.67799	1.87892	3.67799	up	4.04991e+06	21.9495	4.04991e+06	up
C9 H19 N2 O S	380.337	0.418561	202.025	319.993	1.29335	663.222	2117.91	0.0288162	0.995909	0.145616	0.0494608	0.87398	0.000568806	1.11347e-08	1	1	1	1	1	0.731484	1.43192e-05	1036124	19.9828	1036124	up	9.11683	3.18853	9.11683	up	55429	15.7584	55429	up	2.37141	1.24574	2.37141	up	21625.2	14.4004	21625.2	up	-4.15958	-2.05644	4.15958	down	17269.6	14.0759	17269.6	up
C9 H19 N2 O S null 4.338005	284.941	171.822	413.223	250.252	7.16761	12.672	3912.17	0.0390566	0.136741	0.00991599	0.0570954	0.680784	0.584542	1.13762e-14	1	1	1	1	1	1	1.46297e-11	15557589	23.8911	15557589	up	8.45013	3.07897	8.45013	up	144503	17.1407	144503	up	1.6457	0.718699	1.6457	up	398.202	8.63736	398.202	up	3.67799	1.87892	3.67799	up	260106	17.9887	260106	up
C9 H9 N null 6.6420083	293.735	6.66297	149.32	14.6957	15.637	11.0986	3979.35	0.0220469	0.912928	0.136846	0.818221	0.514969	0.583153	3.97601e-16	1	1	1	1	1	1	5.11315e-13	-79.3265	-6.30973	79.3265	down	163.121	7.3498	163.121	up	-38.7622	-5.27658	38.7622	down	238.416	7.89734	238.416	up	-2211.91	-11.1111	2211.91	down	76.2173	6.25205	76.2173	up	-223.82	-7.8062	223.82	down
Cinnamaldehyde	59.5675	81.0546	117.089	14.8666	30.9662	2.36358	2634.5	0.482627	0.372406	0.242086	0.832614	0.384623	0.80973	1.0508e-11	1	1	1	1	1	1	1.35133e-08	-88.646	-6.46998	88.646	down	1.52524	0.60904	1.52524	up	-61.1087	-5.9333	61.1087	down	52.9433	5.72638	52.9433	up	-221.338	-7.7901	221.338	down	97.3548	6.60518	97.3548	up	-348.712	-8.44589	348.712	down
cis-(Homo)2-aconitate nullnullnull 7.218995	341.173	409.432	220.645	41.3138	149.541	72.3004	2676.77	0.0584516	0.0339766	0.155447	0.700585	0.11195	0.266924	2.36931e-09	1	1	1	1	1	1	3.04693e-06	73.0327	6.19047	73.0327	up	-21.0061	-4.39274	21.0061	down	310.659	8.27919	310.659	up	-79.0577	-6.30483	79.0577	down	27.2333	4.7673	27.2333	up	-1139.38	-10.154	1139.38	down	38.4261	5.26401	38.4261	up
DG(16:1(9Z)/22:5(7Z,10Z,13Z,16Z,19Z)/0:0)[iso2]	185.683	91.6954	618.716	486.875	33.3885	201.262	1572.34	0.0556061	0.233287	0.000142911	0.000793965	0.301823	0.0127658	5.82189e-10	1	1	0.183784	1	1	1	7.48695e-07	-623.495	-9.28423	623.495	down	1.01336	0.0191519	1.01336	up	-54489.4	-15.7337	54489.4	down	-1.3416	-0.423949	1.3416	down	-12.113	-3.59849	12.113	down	-2460.29	-11.2646	2460.29	down	-52721.5	-15.6861	52721.5	down
DG(17:0/20:0/0:0)[iso2]	21.7507	185.154	204.085	67.0853	7.17318	13.5722	1703.84	0.699942	0.0533481	0.0400451	0.336445	0.628228	0.505677	1.24912e-10	1	1	1	1	1	1	1.60637e-07	-133.565	-7.06139	133.565	down	1.12053	0.164186	1.12053	up	-1887.88	-10.8826	1887.88	down	1.0535	0.0751948	1.0535	up	-3773.81	-11.8818	3773.81	down	-1.10518	-0.144278	1.10518	down	-43842.9	-15.4201	43842.9	down
DG(17:0/20:0/0:0)[iso2] null 4.997993	4.18509	108.601	59.3022	87.7405	9.39856	1.16194	1690.2	0.94821	0.257822	0.474069	0.333205	0.626377	0.86399	6.84841e-09	1	1	1	1	1	1	8.80706e-06	-121.255	-6.9219	121.255	down	1.27243	0.347587	1.27243	up	-1816.77	-10.8272	1816.77	down	-4.91575	-2.29741	4.91575	down	-3668.53	-11.841	3668.53	down	1.35298	0.436145	1.35298	up	-7919.02	-12.9511	7919.02	down
DG(17:0/20:0/0:0)[iso2] null 5.385005	94.7163	113.345	125.318	137.748	161.936	16.3112	4649.27	0.0455064	0.0255274	0.0176894	0.0121342	0.00140504	0.295433	2.93829e-28	1	1	1	1	1	1	3.77864e-25	-9590.51	-13.2274	9590.51	down	1.87044	0.903374	1.87044	up	-47542.3	-15.5369	47542.3	down	1.41537	0.501178	1.41537	up	-267418	-18.0287	267418	down	-1.09744	-0.134141	1.09744	down	-218482	-17.7372	218482	down
DG(17:0/20:0/0:0)[iso2] null 5.385005 :12	78.2287	34.5077	169.458	116.963	50.0334	26.918	4590.67	0.0573626	0.275675	0.00265455	0.0150722	0.0549926	0.156857	1.5769e-29	1	1	1	1	1	1	2.02789e-26	-8626.1	-13.0745	8626.1	down	1.78193	0.833439	1.78193	up	-203101	-17.6318	203101	down	-1.46238	-0.548321	1.46238	down	-240527	-17.8758	240527	down	-1.25329	-0.325718	1.25329	down	-196511	-17.5843	196511	down
DG(17:1(9Z)/22:0/0:0)[iso2]	1.95955	177.299	55.0966	111.34	144.698	45.1598	2451.42	0.968378	0.0608952	0.409474	0.16824	0.0325654	0.227422	2.13348e-13	1	1	1	1	1	1	2.74365e-10	-36.8846	-5.20495	36.8846	down	13.7242	3.77865	13.7242	up	-868.445	-9.76229	868.445	down	2.87092	1.52151	2.87092	up	-1028.47	-10.0063	1028.47	down	141.754	7.14724	141.754	up	-840.268	-9.71471	840.268	down
DG(17:1(9Z)/22:0/0:0)[iso2] null 1.6809999	13.1503	126.359	350.597	43.3222	13.5721	2.64038	1875.95	0.759845	0.0775198	0.00123564	0.407762	0.453068	0.740298	3.28367e-13	1	1	1	1	1	1	4.2228e-10	-2.83918	-1.50547	2.83918	down	1.0282	0.0401182	1.0282	up	-66.8483	-6.06282	66.8483	down	35.0974	5.13329	35.0974	up	-79.1665	-6.30682	79.1665	down	413.958	8.69334	413.958	up	-64.6794	-6.01523	64.6794	down
DG(17:1(9Z)/22:0/0:0)[iso2] null 5.3839974	180.904	32.0915	95.1654	84.5805	2.05274	12.691	3072.8	0.0283375	0.517844	0.146913	0.180955	0.771522	0.470942	1.18708e-17	1	1	1	1	1	1	1.52659e-14	-612.188	-9.25783	612.188	down	1.36721	0.451234	1.36721	up	-54864.6	-15.7436	54864.6	down	-5.59341	-2.48373	5.59341	down	-64974.5	-15.9876	64974.5	down	1.23404	0.303389	1.23404	up	-10964.6	-13.4206	10964.6	down
DG(17:1(9Z)/22:0/0:0)[iso2] null 5.3900084	265.442	197.171	489.157	140.187	179.499	9.76215	2485.16	0.00128707	0.00637043	1.0615e-05	0.025595	0.00242237	0.466025	2.14422e-18	1	1	0.0136509	1	1	1	2.75747e-15	-8.85341	-3.14623	8.85341	down	1.15139	0.203375	1.15139	up	-48480.2	-15.5651	48480.2	down	1.17511	0.232792	1.17511	up	-57413.8	-15.8091	57413.8	down	1.22898	0.29746	1.22898	up	-46907.3	-15.5175	46907.3	down
DG(19:0/20:3(8Z,11Z,14Z)/0:0)[iso2]	803.955	110.568	12.7384	1105.17	2.81971	13.1752	724.07	1.48061e-07	0.0736811	0.733346	1.64821e-09	0.711467	0.424772	8.55358e-08	0.000190406	1	1	2.1196e-06	1	1	0.000109999	-2443.04	-11.2545	2443.04	down	-1886.89	-10.8818	1886.89	down	-57521.1	-15.8118	57521.1	down	-160686	-17.2939	160686	down	-68120.7	-16.0558	68120.7	down	1.45908	0.545061	1.45908	up	-55654.8	-15.7642	55654.8	down
Dibenzofuran	25.6604	5.86979	8.47708	1.39804	0.0566471	0.856392	118.049	0.0183896	0.385419	0.254344	0.795048	0.891766	0.597089	2.65194e-08	1	1	1	1	1	1	3.41039e-05	18.7226	4.22671	18.7226	up	1.53736	0.620455	1.53736	up	5.34789	2.41897	5.34789	up	1.98006	0.985544	1.98006	up	3.54266	1.82483	3.54266	up	-1.97484	-0.981733	1.97484	down	6.18253	2.6282	6.18253	up
Ecdysone	64.9653	754.517	320.9	1720.87	18.2312	260.089	1193.26	0.497644	0.000621497	0.0359992	2.83998e-07	0.531408	0.0201669	2.71718e-06	1	0.799245	1	0.000365222	1	1	0.00349429	2302737	21.1349	2302737	up	1.7694	0.823261	1.7694	up	130.85	7.03177	130.85	up	40.6606	5.34556	40.6606	up	303967	18.2136	303967	up	89.961	6.49123	89.961	up	642.749	9.32811	642.749	up
Epimedoside D	308.035	75.0261	233.994	233.357	90.6795	17.7546	2512.44	2.73193e-05	0.0577598	0.0002627	0.000268039	0.00915519	0.23995	1.60495e-22	0.0351326	1	0.337832	0.344698	1	1	2.06397e-19	-913.763	-9.83568	913.763	down	-1.24434	-0.315386	1.24434	down	-21514.5	-14.393	21514.5	down	-4.88337	-2.28788	4.88337	down	-25479	-14.637	25479	down	-1.07323	-0.101961	1.07323	down	-20816.4	-14.3454	20816.4	down
Gaidic acid null 5.1409965	52.9424	169.438	498.255	161.097	265.12	120.419	614.464	0.436823	0.0752387	0.000794347	0.0850999	0.00497626	0.0547614	3.50185e-05	1	1	1	1	1	1	0.0450338	5.6636	2.50172	5.6636	up	1.65105	0.72338	1.65105	up	-4.15724	-2.05563	4.15724	down	119.395	6.8996	119.395	up	-4.9233	-2.29963	4.9233	down	20483.3	14.3222	20483.3	up	-4.02236	-2.00804	4.02236	down
Gaidic acid null 7.50401	130.598	167.985	222.602	90.273	92.4043	2.16407	2316.29	0.125601	0.0708291	0.031164	0.235381	0.0864161	0.791001	6.75079e-13	1	1	1	1	1	1	8.68151e-10	-2265.45	-11.1456	2265.45	down	1.21835	0.284931	1.21835	up	-11688.1	-13.5127	11688.1	down	1.63329	0.707783	1.63329	up	-915.602	-9.83858	915.602	down	-21.7164	-4.44071	21.7164	down	-51609.2	-15.6553	51609.2	down
Isomaltotriose	44.375	102.497	139.415	120.719	88.3724	16.5585	3478.88	0.389048	0.117098	0.0557217	0.0810099	0.0548086	0.400967	2.25757e-19	1	1	1	1	1	1	2.90324e-16	5703.62	12.4777	5703.62	up	-2.02274	-1.01631	2.02274	down	56736.2	15.792	56736.2	up	-2.17479	-1.12088	2.17479	down	72.2842	6.17561	72.2842	up	1.02765	0.0393429	1.02765	up	12530.9	13.6132	12530.9	up
MIPC(t20:0/26:0(2OH))	588.66	60.0307	304.971	427.19	161.249	54.6035	1940.26	1.28346e-05	0.266772	0.00190006	0.000202808	0.0088834	0.122011	4.56222e-14	0.0165053	1	1	0.260811	1	1	5.86702e-11	-74.1961	-6.21327	74.1961	down	7.97563	2.9956	7.97563	up	-1746.94	-10.7706	1746.94	down	-2.39106	-1.25765	2.39106	down	-2068.85	-11.0146	2068.85	down	22.5357	4.49414	22.5357	up	-1690.26	-10.723	1690.26	down
Naphthalene null 7.163007	120.341	258.13	182.906	243.919	113.928	90.3692	1540.5	0.21814	0.0411146	0.101285	0.0486662	0.090442	0.130804	1.93183e-08	1	1	1	1	1	1	2.48433e-05	-3.26864	-1.70869	3.26864	down	768.456	9.58582	768.456	up	-2.61051	-1.38433	2.61051	down	807.929	9.65808	807.929	up	-91.1415	-6.51004	91.1415	down	12.1138	3.59858	12.1138	up	-74.4629	-6.21845	74.4629	down
N-Methyltryptamine nullnullnull 5.1130013	2.60385	278.574	385.198	21.3448	27.0257	0.0300548	2759.89	0.979283	0.113695	0.0511342	0.842609	0.511775	0.982519	4.37161e-09	1	1	1	1	1	1	5.62189e-06	32.515	5.02303	32.515	up	1.4744	0.560125	1.4744	up	107.053	6.74218	107.053	up	-136.63	-7.09413	136.63	down	73.2795	6.19534	73.2795	up	-1532.14	-10.5813	1532.14	down	150.83	7.23678	150.83	up
PA(15:1(9Z)/18:4(6Z,9Z,12Z,15Z))	68.1615	14.4824	72.5151	1.26823	62.26	6.66436	3403.96	0.0973383	0.601963	0.0842958	0.956256	0.0395217	0.494981	8.61795e-25	1	1	1	1	1	1	1.10827e-21	-67.2026	-6.07045	67.2026	down	20.9082	4.386	20.9082	up	-1582.28	-10.6278	1582.28	down	15.7606	3.97825	15.7606	up	-1873.85	-10.8718	1873.85	down	24.4164	4.60978	24.4164	up	-1530.94	-10.5802	1530.94	down
PA(19:0/20:3(8Z,11Z,14Z))	253.833	115.103	450.736	70.3806	407.981	221.7	2604.61	0.00914415	0.110372	0.000348717	0.255808	0.000143542	0.0041673	1.40616e-15	1	1	0.44845	1	0.184595	1	1.80832e-12	-1.47031	-0.556125	1.47031	down	683.123	9.416	683.123	up	-34.6185	-5.11347	34.6185	down	1951.84	10.9306	1951.84	up	-40.9977	-5.35747	40.9977	down	5783.53	12.4977	5783.53	up	-33.4952	-5.06588	33.4952	down
PA(21:0/0:0) null 7.450993	141.308	22.4906	19.6295	117.599	0.069892	9.38267	1503.12	0.224452	0.785111	0.809578	0.287184	0.969123	0.654022	2.41727e-07	1	1	1	1	1	1	0.00031086	2415.33	11.238	2415.33	up	1.7694	0.823261	1.7694	up	158.681	7.30999	158.681	up	1.6457	0.718699	1.6457	up	397.549	8.63499	397.549	up	3.67799	1.87892	3.67799	up	18279.7	14.158	18279.7	up
PA(22:2(13Z,16Z)/20:4(5Z,8Z,11Z,14Z))	431.362	54.8207	92.3078	447.168	17.8314	49.301	1992.87	0.0049006	0.486525	0.299671	0.0040897	0.493632	0.256363	3.2323e-10	1	1	1	1	1	1	4.15674e-07	140596	17.1012	140596	up	1.7694	0.823261	1.7694	up	674.715	9.39813	674.715	up	1.6457	0.718699	1.6457	up	3.88193	1.95678	3.88193	up	3.67799	1.87892	3.67799	up	19817	14.2745	19817	up
PA(O-18:0/15:0)	174.494	22.4522	184.903	81.9659	5.01334	144.73	1684.09	0.192957	0.805812	0.175323	0.457448	0.756708	0.0990331	2.3835e-07	1	1	1	1	1	1	0.000306518	-89.8398	-6.48928	89.8398	down	1.14811	0.199266	1.14811	up	-2115.27	-11.0466	2115.27	down	1.00363	0.00522804	1.00363	up	-316.862	-8.30771	316.862	down	-107.228	-6.74453	107.228	down	-2046.64	-10.999	2046.64	down
PA(O-18:0/15:1(9Z))	191.753	23.6588	83.5001	432.6	42.1692	200.606	1094.23	0.0801937	0.725475	0.326184	0.00423704	0.287272	0.0221287	6.24178e-07	1	1	1	1	1	1	0.000802693	-92.3852	-6.52959	92.3852	down	1.11835	0.16137	1.11835	up	-1040.35	-10.0228	1040.35	down	1.0431	0.0608828	1.0431	up	-1.33031	-0.411761	1.33031	down	-24.2284	-4.59863	24.2284	down	-200.387	-7.64664	200.387	down
PA(O-18:0/17:0)	217.38	229.349	23.9244	146.035	1.65097	16.1931	754.751	0.0408201	0.0344996	0.693453	0.113112	0.822345	0.482609	7.65727e-06	1	1	1	1	1	1	0.00984725	-30.4333	-4.92758	30.4333	down	4.70967	2.23563	4.70967	up	-716.549	-9.48492	716.549	down	-563.248	-9.13763	563.248	down	-848.589	-9.72892	848.589	down	-3.10567	-1.6349	3.10567	down	-693.3	-9.43734	693.3	down
PA(O-20:0/0:0) null 1.5220019	123.456	27.8738	101.216	6.24774	104.897	45.1151	3148.74	0.00854826	0.322788	0.0192782	0.773743	0.0043924	0.0577292	9.73656e-26	1	1	1	1	1	1	1.25212e-22	-653.226	-9.35144	653.226	down	-1.79923	-0.847378	1.79923	down	-55000.2	-15.7471	55000.2	down	-3.36865	-1.75217	3.36865	down	-1080.07	-10.0769	1080.07	down	1.22808	0.296402	1.22808	up	-53215.7	-15.6996	53215.7	down
PA(O-20:0/0:0) null 1.6719983	47.3888	362.179	612.132	177.439	32.1641	0.950201	992.871	0.519937	0.00887621	0.000470714	0.0915385	0.347021	0.871219	1.39049e-06	1	1	0.605339	1	1	1	0.00178817	4.9498	2.30737	4.9498	up	-2.68282	-1.42375	2.68282	down	-4.75675	-2.24998	4.75675	down	539.229	9.07475	539.229	up	1.59868	0.676881	1.59868	up	10836.4	13.4036	10836.4	up	-4.60241	-2.20239	4.60241	down
PA(O-20:0/0:0) null 9.077011	28.3265	94.5883	76.1211	144.306	65.1894	70.3628	3183.49	0.641063	0.231303	0.306428	0.109631	0.155579	0.140329	2.26695e-15	1	1	1	1	1	1	2.91529e-12	-161.311	-7.3337	161.311	down	1.15907	0.21297	1.15907	up	-620.434	-9.27713	620.434	down	46.1651	5.52873	46.1651	up	-26.0849	-4.70514	26.0849	down	30.0198	4.90784	30.0198	up	-3674.83	-11.8435	3674.83	down
PA(O-20:0/0:0) nullnullnull 4.4700007	140.482	182.915	69.1864	338.404	8.08872	413.546	2452.69	0.237014	0.155123	0.488652	0.0341796	0.682121	0.00438956	5.2429e-10	1	1	1	1	1	1	6.74238e-07	-204.573	-7.67647	204.573	down	-224.562	-7.81097	224.562	down	-66348.3	-16.0178	66348.3	down	-1890.27	-10.8844	1890.27	down	-44033.8	-15.4263	44033.8	down	-2.00112	-1.00081	2.00112	down	-344610	-18.3946	344610	down
PA(O-20:0/0:0) nullnullnull 4.856996	405.275	107.152	87.7522	198.391	45.9909	116.574	1309.13	0.00648393	0.2463	0.31617	0.0778212	0.27178	0.0820879	1.01831e-07	1	1	1	1	1	1	0.000130955	-3120.95	-11.6078	3120.95	down	-6.80844	-2.76733	6.80844	down	-290.319	-8.1815	290.319	down	-1.5207	-0.60474	1.5207	down	-1.06547	-0.0914867	1.06547	down	1.30526	0.384341	1.30526	up	-63937.1	-15.9644	63937.1	down
PA(O-20:0/0:0) nullnullnull 7.205003	239.868	594.636	378.757	100.962	125.637	328.265	817.472	0.0319852	0.000334141	0.00500789	0.225663	0.0556688	0.00241436	4.44224e-06	1	0.429705	1	1	1	1	0.00571271	15.9985	3.99986	15.9985	up	-6.58288	-2.71872	6.58288	down	-1.46045	-0.546412	1.46045	down	-45.7038	-5.51424	45.7038	down	-1.39419	-0.479429	1.39419	down	-962925	-19.8771	962925	down	-1.44291	-0.528986	1.44291	down
PA(O-20:0/0:0) nullnullnull 7.432006	239.243	371.804	38.6062	99.5459	39.4381	28.3655	2695.57	0.187326	0.0764677	0.759169	0.493484	0.454643	0.525787	2.86644e-08	1	1	1	1	1	1	3.68624e-05	1.19493e+06	20.1885	1.19493e+06	up	122.661	6.93853	122.661	up	843.237	9.71979	843.237	up	10.5812	3.40343	10.5812	up	10219.3	13.319	10219.3	up	3.67799	1.87892	3.67799	up	78811.9	16.2661	78811.9	up
PA(O-20:0/0:0) nullnullnull 9.088992	204.956	160.121	78.1841	106.052	27.645	105.826	333.558	0.0022214	0.00776784	0.0860565	0.0373053	0.184578	0.0106703	1.42781e-05	1	1	1	1	1	1	0.0183616	92.2346	6.52724	92.2346	up	-1.05296	-0.0744505	1.05296	down	4.001	2.00036	4.001	up	1.82957	0.871502	1.82957	up	3.50315	1.80865	3.50315	up	-704.584	-9.46063	704.584	down	4.21383	2.07513	4.21383	up
PA(P-20:0/0:0)	92.1112	124.837	95.7601	67.1632	32.0709	22.2616	5838.94	0.0316236	0.00998887	0.0277598	0.078067	0.11655	0.18988	3.21721e-33	1	1	1	1	1	1	4.13733e-30	642814	19.294	642814	up	1.7694	0.823261	1.7694	up	572321	19.1265	572321	up	1.6457	0.718699	1.6457	up	521079	18.9911	521079	up	3.67799	1.87892	3.67799	up	610351	19.2193	610351	up
PA(P-20:0/0:0) null 4.459997	611.116	10.9003	164.045	72.1309	4.82744	33.9113	1628.89	0.00116868	0.876297	0.143919	0.42102	0.733102	0.367255	2.1123e-08	1	1	1	1	1	1	2.71642e-05	-2492.3	-11.2833	2492.3	down	-24.2528	-4.60008	24.2528	down	-58681	-15.8406	58681	down	-119.111	-6.89617	119.111	down	-673.286	-9.39508	673.286	down	-4.11181	-2.03977	4.11181	down	-56777	-15.793	56777	down
PA(P-20:0/0:0) null 5.422998	41.1965	312.093	612.398	129.89	83.0026	206.041	1709.26	0.532945	0.0109156	0.000226442	0.142485	0.114059	0.0139271	3.45564e-10	1	1	0.291205	1	1	1	4.44396e-07	-2579.73	-11.333	2579.73	down	1.10341	0.141972	1.10341	up	-60739.5	-15.8903	60739.5	down	1.46794	0.553792	1.46794	up	-71932.1	-16.1343	71932.1	down	-126.966	-6.98829	126.966	down	-10123.5	-13.3054	10123.5	down
PA(P-20:0/0:0) null 7.1309958	370.828	13.7614	38.2019	389.754	1.26057	15.3781	4961.94	0.000741494	0.744916	0.444098	0.000531866	0.816613	0.418912	2.35667e-23	0.953561	1	1	0.683979	1	1	3.03067e-20	3.23334e+06	21.6246	3.23334e+06	up	1.7694	0.823261	1.7694	up	130712	16.996	130712	up	1.6457	0.718699	1.6457	up	536.476	9.06737	536.476	up	3.67799	1.87892	3.67799	up	877397	19.7429	877397	up
PA(P-20:0/0:0) nullnullnull 7.426008	88.2389	430.671	235.53	247.814	56.1919	146.046	4959.36	0.258644	0.00208794	0.0300877	0.0252872	0.189427	0.0360744	1.01473e-19	1	1	1	1	1	1	1.30495e-16	293.31	8.19628	293.31	up	-2686.91	-11.3917	2686.91	down	8.77895	3.13405	8.77895	up	-13150.6	-13.6828	13150.6	down	12.8277	3.68119	12.8277	up	-28938.9	-14.8207	28938.9	down	16.6823	4.06025	16.6823	up
PE(18:3(6Z,9Z,12Z)/19:0)	57.0807	99.7831	22.6133	3.32724	489.572	752.692	1644.52	0.332067	0.148688	0.643567	0.936897	3.87695e-05	6.966e-07	1.23328e-11	1	1	1	1	0.0498575	0.000895828	1.58599e-08	-3821.94	-11.9001	3821.94	down	-883.406	-9.78693	883.406	down	-89987.4	-16.4574	89987.4	down	-4385.4	-12.0985	4385.4	down	-106570	-16.7014	106570	down	-22290.9	-14.4442	22290.9	down	-87067.8	-16.4099	87067.8	down
PE(19:1(9Z)/20:5(5Z,8Z,11Z,14Z,17Z))	8.42743	196.443	557.88	41.7857	20.9302	0.538761	2089.75	0.876548	0.0521251	0.000396031	0.522724	0.420723	0.896992	9.49742e-12	1	1	0.509296	1	1	1	1.22137e-08	-4.596	-2.20038	4.596	down	-3.33544	-1.73788	3.33544	down	-108.213	-6.75773	108.213	down	89.8055	6.48873	89.8055	up	-128.153	-7.00173	128.153	down	597.282	9.22227	597.282	up	-104.702	-6.71014	104.702	down
PE(20:1(11Z)/18:3(9Z,12Z,15Z))	55.7227	36.2549	31.6972	74.2516	0.13354	7.71392	5035.3	0.178085	0.322425	0.371017	0.102116	0.926929	0.486504	2.26511e-28	1	1	1	1	1	1	2.91293e-25	833428	19.6687	833428	up	1.7694	0.823261	1.7694	up	196336	17.583	196336	up	5.70988	2.51346	5.70988	up	134225	17.0343	134225	up	3.67799	1.87892	3.67799	up	216989	17.7273	216989	up
PE(P-20:0/18:1(9Z))	17.8547	62.1457	150.179	12.347	2163.45	1649.34	643.507	0.741252	0.356394	0.0867229	0.812763	1.38575e-12	1.49441e-10	1.41427e-05	1	1	1	1	1.78208e-09	1.92181e-07	0.0181875	-8623.08	-13.074	8623.08	down	-527513	-19.0088	527513	down	-32343.3	-14.9812	32343.3	down	-567166	-19.1134	567166	down	-240442	-17.8753	240442	down	-253775	-17.9532	253775	down	-34117.8	-15.0582	34117.8	down
PG(14:1(9Z)/18:4(6Z,9Z,12Z,15Z))	62.7219	2.14737	29.1264	65.2966	12.8324	0.61386	5156.66	0.237271	0.951039	0.509114	0.223932	0.440933	0.865895	7.66516e-25	1	1	1	1	1	1	9.85739e-22	986502	19.912	986502	up	1.7694	0.823261	1.7694	up	246773	17.9128	246773	up	1.6457	0.718699	1.6457	up	15341.7	13.9052	15341.7	up	3.67799	1.87892	3.67799	up	244389	17.8988	244389	up
PG(19:0/20:5(5Z,8Z,11Z,14Z,17Z))	21.6451	34.2296	29.0085	28.7115	4.01463	6.85521	7971.7	0.431606	0.267131	0.325715	0.329421	0.576163	0.465447	1.50641e-37	1	1	1	1	1	1	1.93725e-34	20611900	24.297	20611900	up	1.7694	0.823261	1.7694	up	1.43931e+06	20.4569	1.43931e+06	up	1.6457	0.718699	1.6457	up	929365	19.8259	929365	up	3.67799	1.87892	3.67799	up	1.58154e+06	20.5929	1.58154e+06	up
PG(20:5(5Z,8Z,11Z,14Z,17Z)/21:0)	126.497	25.2448	243.318	18.8625	154.393	50.6454	3004.78	0.0904077	0.611125	0.0112131	0.691716	0.0161532	0.162663	6.62887e-17	1	1	1	1	1	1	8.52473e-14	-24.7641	-4.63018	24.7641	down	28.8493	4.85046	28.8493	up	-583.07	-9.18753	583.07	down	78.1133	6.2875	78.1133	up	-690.513	-9.43153	690.513	down	113.558	6.82728	113.558	up	-564.152	-9.13994	564.152	down
PG(P-18:0/20:1(11Z))	521.171	362.235	551.9	340.861	117.447	30.5623	2674.78	1.99192e-06	6.77925e-05	1.04575e-06	0.000111935	0.00938733	0.177653	3.19289e-20	0.00256161	0.0871812	0.00134484	0.143949	1	1	4.10606e-17	-4074.62	-11.9924	4074.62	down	1.21477	0.280678	1.21477	up	-95936.7	-16.5498	95936.7	down	-4.99901	-2.32164	4.99901	down	-113615	-16.7938	113615	down	-36.7294	-5.19886	36.7294	down	-92824	-16.5022	92824	down
PI(22:0/22:4(7Z,10Z,13Z,16Z))	27.4147	10.3917	188.365	416.037	24.672	288.043	1949.83	0.655669	0.851655	0.0604249	0.00264962	0.3849	0.00383562	3.78719e-11	1	1	1	1	1	1	4.87032e-08	-3340.65	-11.7059	3340.65	down	1.07827	0.10872	1.07827	up	-2589.04	-11.3382	2589.04	down	-1.51481	-0.599135	1.51481	down	-7.43046	-2.89345	7.43046	down	-163.846	-7.3562	163.846	down	-76103.4	-16.2157	76103.4	down
PS(18:0/19:1(9Z))	68.0233	153.471	267.834	317.505	3.61462	16.0329	2908.13	0.337186	0.0899622	0.0164893	0.00808218	0.732996	0.473073	8.6637e-15	1	1	1	1	1	1	1.11415e-11	-4434	-12.1144	4434	down	-1.43887	-0.524936	1.43887	down	-12629.1	-13.6245	12629.1	down	-3.02049	-1.59478	3.02049	down	-49726.2	-15.6017	49726.2	down	-1.59009	-0.669109	1.59009	down	-402138	-18.6173	402138	down
PS(19:0/20:2(11Z,14Z))	10.533	71.1922	144.376	19.2272	181.162	131.512	3731.41	0.834796	0.300165	0.0906727	0.719682	0.0148441	0.0368784	9.7288e-18	1	1	1	1	1	1	1.25112e-14	-47.5426	-5.57115	47.5426	down	96.7859	6.59672	96.7859	up	-1119.39	-10.1285	1119.39	down	39.9341	5.31955	39.9341	up	-1325.66	-10.3725	1325.66	down	1255.38	10.2939	1255.38	up	-1083.07	-10.0809	1083.07	down
PS(19:0/20:2(11Z,14Z)) null 1.5149995	173.423	295.239	656.474	36.1892	220.426	90.9697	2229.53	0.0918084	0.0187476	0.000244109	0.599661	0.0144879	0.111919	1.63241e-11	1	1	0.313925	1	1	1	2.09927e-08	21.1397	4.40188	21.1397	up	772.768	9.59389	772.768	up	-1.11378	-0.155463	1.11378	down	42172.7	15.364	42172.7	up	-1.31902	-0.399463	1.31902	down	103449	16.6586	103449	up	-1.07764	-0.107878	1.07764	down
PS(19:1(9Z)/22:6(4Z,7Z,10Z,13Z,16Z,19Z))	344.539	119.252	313.31	75.5272	185.255	14.4898	2883.26	0.054895	0.356692	0.0707517	0.518782	0.0756147	0.61573	6.49539e-10	1	1	1	1	1	1	8.35307e-07	-2123.32	-11.0521	2123.32	down	-95.5943	-6.57885	95.5943	down	-801652	-19.6126	801652	down	-841.127	-9.71618	841.127	down	-949374	-19.8566	949374	down	-2.03653	-1.02611	2.03653	down	-137045	-17.0643	137045	down
PS(19:1(9Z)/22:6(4Z,7Z,10Z,13Z,16Z,19Z)) null 1.5229995	35.187	376.512	77.3216	302.147	1964.88	10.8745	1348.59	0.670884	0.0172467	0.418342	0.0371348	3.81064e-09	0.619933	4.42068e-07	1	1	1	1	4.90049e-06	1	0.0005685	5.04732	2.33552	5.04732	up	-4147.52	-12.018	4147.52	down	-1596.3	-10.6405	1596.3	down	-4459.28	-12.1226	4459.28	down	-23.4934	-4.55418	23.4934	down	-1995.28	-10.9624	1995.28	down	61.1082	5.9333	61.1082	up
PS(20:0/17:0)	219.437	136.554	126.917	278.776	35.089	7.85354	1004.5	0.033467	0.116378	0.134903	0.0140657	0.28946	0.615205	2.29141e-07	1	1	1	1	1	1	0.000294675	-205.609	-7.68376	205.609	down	-1.49785	-0.582893	1.49785	down	-55.0286	-5.78211	55.0286	down	-3.53345	-1.82108	3.53345	down	-58.2044	-5.86306	58.2044	down	4.93003	2.3016	4.93003	up	-71065.8	-16.1169	71065.8	down
PS(20:0/17:0) null 2.436002	67.7213	179.58	538.46	2.97578	172.191	61.0459	2534.9	0.356567	0.0690282	0.000557497	0.955108	0.0239368	0.173893	3.57711e-13	1	1	0.716941	1	1	1	4.60017e-10	-1.65622	-0.727898	1.65622	down	22.4625	4.48944	22.4625	up	-38.9957	-5.28524	38.9957	down	1231.17	10.2658	1231.17	up	-46.1815	-5.52924	46.1815	down	5431.26	12.4071	5431.26	up	-37.7305	-5.23766	37.7305	down
PS(20:0/17:0) nullnullnull 1.5210004	193.254	502.02	137.689	233.559	4.24507	109.376	2404.56	0.195421	0.0165997	0.310173	0.140284	0.787281	0.173413	1.08985e-08	1	1	1	1	1	1	1.40155e-05	1235.1	10.2704	1235.1	up	1.00593	0.00853014	1.00593	up	111.791	6.80466	111.791	up	-863.375	-9.75384	863.375	down	3.4745	1.79681	3.4745	up	-2012.83	-10.975	2012.83	down	17.1376	4.09909	17.1376	up
PS(21:0/0:0)	222.881	31.0819	40.91	208.889	221.153	199.831	3023.74	0.020125	0.565292	0.472869	0.0254126	0.00551696	0.00817967	2.21894e-16	1	1	1	1	1	1	2.85355e-13	-15001.6	-13.8728	15001.6	down	-1.05297	-0.0744624	1.05297	down	-1338.08	-10.386	1338.08	down	1.12608	0.171316	1.12608	up	-7.58436	-2.92303	7.58436	down	-1.06614	-0.0923905	1.06614	down	-341752	-18.3826	341752	down
PS(21:0/0:0) null 4.5429997	257.516	631.446	1250.25	59.3744	591.89	361.754	1538.03	0.023118	0.000179344	1.90978e-07	0.405068	5.77698e-05	0.00132603	1.70088e-09	1	0.230636	0.000245597	1	0.074292	1	2.18733e-06	108.242	6.75812	108.242	up	1523.78	10.5734	1523.78	up	4.59726	2.20078	4.59726	up	323207	18.3021	323207	up	3.88193	1.95678	3.88193	up	1.82038e+06	20.7958	1.82038e+06	up	4.75143	2.24836	4.75143	up
PS(21:0/0:0) nullnullnull 1.5189985	138.403	14.2095	86.2176	319.097	12.9454	11.7742	1683.17	0.247484	0.864286	0.416388	0.0431694	0.607395	0.624103	1.12312e-07	1	1	1	1	1	1	0.000144434	1308.25	10.3534	1308.25	up	-7.28387	-2.8647	7.28387	down	35.2201	5.13833	35.2201	up	-29.636	-4.88928	29.636	down	84.1034	6.39409	84.1034	up	1.03833	0.0542669	1.03833	up	1039.35	10.0215	1039.35	up
TG(14:1(9Z)/14:1(9Z)/14:1(9Z)) null 1.6790007	272.271	198.118	303.31	140.034	180.645	66.1205	509.539	0.00276479	0.0125467	0.00149482	0.0429304	0.00475356	0.0822406	5.78571e-06	1	1	1	1	1	1	0.00744043	29.7617	4.89538	29.7617	up	631.78	9.30328	631.78	up	1.26404	0.338037	1.26404	up	4.94222	2.30516	4.94222	up	1.06735	0.094038	1.06735	up	18205	14.152	18205	up	1.30642	0.385623	1.30642	up
Triacetin	29.7204	574.762	485.955	205.893	81.3571	141.88	1236.12	0.675386	0.000978495	0.00262929	0.0716425	0.145913	0.0561215	2.11346e-07	1	1	1	1	1	1	0.000271791	-8.60533	-3.10523	8.60533	down	-2.12556	-1.08784	2.12556	down	16.8912	4.0782	16.8912	up	-138.856	-7.11745	138.856	down	-42.1487	-5.39742	42.1487	down	-3303.03	-11.6896	3303.03	down	23.6144	4.5616	23.6144	up
Trypanothione disulfide	39.8616	28.9749	74.7283	112.568	38.6485	67.5094	1902.96	0.221246	0.331992	0.0621201	0.0164253	0.088193	0.0252829	3.65686e-19	1	1	1	1	1	1	4.70273e-16	-180.535	-7.49614	180.535	down	1.87488	0.906802	1.87488	up	-4250.69	-12.0535	4250.69	down	1.40481	0.490375	1.40481	up	-19.3476	-4.27408	19.3476	down	-3.15732	-1.6587	3.15732	down	-4112.78	-12.0059	4112.78	down
Tylosin	34.1987	22.2242	51.4155	59.7362	1125.25	1509.61	761.282	0.259053	0.413358	0.133685	0.0975161	2.0207e-14	3.42563e-17	2.97487e-11	1	1	1	1	2.59862e-11	4.40535e-14	3.82569e-08	-5406.93	-12.4006	5406.93	down	-330767	-18.3355	330767	down	-127306	-16.9579	127306	down	-355630	-18.44	355630	down	-150765	-17.2019	150765	down	-159125	-17.2798	159125	down	-123175	-16.9104	123175	down
[truncated: 189 more columns]
